# Supplementary material for: TCF7L2 rs7903146 polymorphism association with diabetes and obesity in an elderly cohort from Brazil
Source: PubMed Central journal article supplement (PMC8106398; doi:10.7717/peerj.11349), 2021-05-05
Supplement: peerj-09-11349-s009.pdf [file peerj-09-11349-s009.pdf]

# QUESTIONÁRIO C10

DATA DESTA ENTREVISTA: Dia |\_\_|\_| | Mês |\_\_|\_| | 201\_\_

Nome da entrevistadora: \_\_\_\_\_

Hora de início: |\_\_|\_|:|\_\_|\_| | Hora de término: |\_\_|\_|:|\_\_|\_| |

## ESTUDO SABE - SAUDE, BEM ESTAR E ENVELHECIMENTO

NUMERO DO QUESTIONÁRIO

|  |  |  |  |  |  |  |  |  |  |
|--|--|--|--|--|--|--|--|--|--|
|  |  |  |  |  |  |  |  |  |  |
|--|--|--|--|--|--|--|--|--|--|

Sexo: Mulher  1

Nome completo do entrevistado \_\_\_\_\_

Homem  2

Telefone do(a) idoso(a): \_\_\_\_\_

Endereço: (rua, numero externo e interno, CEP) \_\_\_\_\_

1. Nome: \_\_\_\_\_ Parentesco com idoso: \_\_\_\_\_

Telefones de contato: \_\_\_\_\_

2. Nome: \_\_\_\_\_ Parentesco com idoso: \_\_\_\_\_

Telefones de contato: \_\_\_\_\_

3. Nome: \_\_\_\_\_ Parentesco com idoso: \_\_\_\_\_

Telefones de contato: \_\_\_\_\_

4. Nome: \_\_\_\_\_ Parentesco com idoso: \_\_\_\_\_

Telefones de contato: \_\_\_\_\_

**ATENÇÃO: PREENCHER**

**ATENÇÃO: REVISAR AO FINAL DA ENTREVISTA CÓD. RESULTADOS**

Resultado\*   \* Códigos de Resultados:

- 01 Entrevista completa ( ) 1 dia ( ) + de um dia
- 02 Entrevista completa com informante auxiliar
- 03 Entrevista completa com informante substituto
- 04 Entrevista incompleta (anote em observações)
- 05 Entrevista adiada (anote em observações)

- 06 Ausente temporário
- 07 Nunca encontrou a pessoa
- 08 Recusou-se
- 09 Incapacitado e sem informante
- 10 Outros (anote em observações)

Nome do informante: \_\_\_\_\_ Parentesco com idoso: \_\_\_\_\_

Caso não seja familiar, há quanto tempo conhece o(a) idoso(a): \_\_\_\_\_

| Entregue | Crítica | Revisto | P/digit | Checagem | Codificação | Digitação | REGISTRO EPIDATA |
|----------|---------|---------|---------|----------|-------------|-----------|------------------|
|          |         |         |         |          |             |           |                  |

Observações: \_\_\_\_\_

**SEÇÃO A - INFORMAÇÕES PESSOAIS**

HORA DE INÍCIO: |\_|\_|:|\_|\_|

**DECLARAÇÃO VOLUNTÁRIA**

Antes de começar, gostaria de assegurar-lhe que esta entrevista é completamente voluntária e confidencial. Se houver alguma pergunta que o Sr (a) não deseje responder, simplesmente me avise e seguiremos para a próxima pergunta.

A.1a  
Em que dia, mês e ano o(a) Sr(a) nasceu?

**A. 01**

DIA E MÊS.....|\_|\_|.....|\_|\_|.....  
DIA MÊS

ANO.....|\_|\_|.....|\_|\_|.....

A.1b  
Quantos anos completos o(a) Sr.(a) tem?

**A. 02**

Nº DE ANOS.....|\_|\_|.....|\_|\_|.....

A.2  
O(a) Sr(a) nasceu no Brasil?

**A. 03**

SIM ..... 1 → **A. 06**  
 NÃO ..... 2  
 NS ..... 8  
 NR ..... 9

A.3  
Em que país o(a) Sr(a) nasceu?

**A. 04**

País \_\_\_\_\_  
 \_\_\_\_\_  
 \_\_\_\_\_

A.4a  
No total, há quantos anos o(a) Sr(a) vive no Brasil?

**A. 05**

IDADE.....|\_|\_|.....|\_|\_|.....  
 NS ..... 998  
 NR ..... 999

A.4b  
Desde que o Sr.(a) nasceu até os 15 anos, viveu no campo por 5 anos ou mais?

**A. 06**

SIM ..... 1  
 NÃO ..... 2  
 NS ..... 8  
 NR ..... 9

A.5a  
O(a) Sr.(a) sabe ler e escrever um recado?

**A. 07**

SIM ..... 1  
 NÃO..... 2  
 NR ..... 9

A.5b  
O(a) Sr.(a) foi à escola?

**A. 08**

SIM ..... 1  
 NÃO ..... 2 } **A.10**  
 NS ..... 8 }  
 NR ..... 9 }

**SEÇÃO A - INFORMAÇÕES PESSOAIS**

A.6

**Qual a última série (e de que grau) da escola em que o Sr(a) obteve aprovação?**

**ANOTE A SÉRIE DO ÚLTIMO GRAU APROVADO**

**A.09**

ÚLTIMA SÉRIE(ano escolar) CURSADA PELO (A) IDOSO(A):

Primeiro grau (ou primário + ginásio) ..... 01 |\_\_\_|

Segundo grau (antigo clássico e científico) .... 02 |\_\_\_|

Técnico de nível médio (ex: técnico em contabilidade, laboratório) ..... 04 |\_\_\_|

Magistério - segundo grau (antigo normal) ..... 06 |\_\_\_|

Graduação (nível superior) ..... 07 |\_\_\_|

Pós-graduação ..... 08 |\_\_\_|

Supletivo/Madureza..... 09 |\_\_\_|

NS..... 988

NR..... 999

A.7

**Atualmente o(a) Sr(a). vive sozinho(a) ou acompanhado(a)**

**A.10**

SOZINHO ..... 1

ACOMPANHADO ..... 2

NR..... 9

A.7a

**Há 5 anos, o Sr(a) morava: - exatamente com as MESMAS PESSOAS com quem mora agora OU SOZINHO?**

UTILIZE A REDAÇÃO CORRESPONDENTE SEGUNDO O CASO

**A.11**

SIM ..... 1 → **A. 15**

NÃO ..... 2

NR ..... 9

A.7b

**Há 5 anos o(a) Sr.(a) vivia...**

LEIA CADA OPÇÃO E CIRCULE TODAS AS AFIRMATIVAS

**A.12**

SÓ? ..... 10

COM ESPOSO(A) OU COMPANHEIRO (A)? ..... 20

COM UM OU MAIS FILHO(A)(S) CASADO(A)(S) ? ..... 30

COM UM OU MAIS FILHO(A)(S) SOLTEIRO(A)(S) ? ..... 40

COM OUTRO FAMILIAR? ..... 50

COM OUTRO NÃO FAMILIAR REMUNERADO QUE O AJUDAVA? ..... 61

COM OUTRO NÃO FAMILIAR NÃO REMUNERADO? .... 62

COM EMPREGADA DOMÉSTICA? ..... 70

NS ..... 98

NR ..... 99

**SEÇÃO A - INFORMAÇÕES PESSOAIS**

A.7c

**Por que o(a) Sr(a) já não mora com as mesmas pessoas com quem morava há 5 anos?**

ANOTE TODAS AS OPÇÕES MENCIONADAS ESPONTANEAMENTE

**A. 13**

**RAZÕES RELACIONADAS AOS FILHOS DO(A) IDOSO(A):**

- ECONÔMICAS ..... 01
- SEPARAÇÃO CONJUGAL ..... 02
- UNIÃO CONJUGAL ..... 03
- PARA CUIDAR DAS CRIANÇAS ..... 04

**RAZÕES RELACIONADAS COM O(A) IDOSO(A):**

- ECONÔMICAS ..... 05
- SEPARAÇÃO CONJUGAL ..... 06
- UNIÃO CONJUGAL ..... 13
- FALECIMENTO ..... 07

*Especifique*

- SE SENTIA SÓ ..... 08
- PRECISAVA DE AJUDA ..... 09

*Especifique*

- OUTRO ..... 11

*Especifique*

- ACOLHIMENTO DE PARENTE (neto, sobrinho, etc) ..... 12
- NS ..... 98
- NR ..... 99

A.9

**Se o(a) Sr(a) pudesse escolher, preferiria morar...**

LEIA AS OPÇÕES E ANOTE TODAS AS AFIRMATIVAS

**A. 15**

- SÓ?..... 10
- COM ESPOSO(A) OU COMPANHEIRO (A)?..... 20
- COM UM OU MAIS FILHO(A)(S) CASADO(A)(S) ?..... 30
- COM UM OU MAIS FILHO(A)(S) SOLTEIRO(A)(S) ?..... 31
- COM NETO..... 40
- COM OUTRO FAMILIAR?..... 50
- COM OUTRO NÃO FAMILIAR REMUNERADO QUE O AJUDAVA?..... 61
- COM OUTRO NÃO FAMILIAR NÃO REMUNERADO? ..... 62
- EMPREGADA DOMÉSTICA?..... 70
- NS..... 98
- NR..... 99

**SEÇÃO A - INFORMAÇÕES PESSOAIS**

A.10a

Há 5 anos, o(a) Sr.(a) morava nesta mesma casa?

**A. 16**

SIM ..... 1 → **A. 18**  
 NÃO ..... 2  
 NR ..... 9

A.10b

Qual a principal razão pela qual o(a) Sr.(a) se mudou?

ANOTE SOMENTE **UMA** RESPOSTA

**A. 17**

ESTAR PERTO DE OU COM O(A) FILHO(A) ..... 01  
 ESTAR PERTO DE OU COM FAMILIARES OU AMIGOS ..... 02  
 ESTAR PERTO DOS SERVIÇOS DE SAÚDE ..... 03  
 PARA SE SENTIR MAIS SEGURO (**MEDO DA VIOLÊNCIA**) ..... 04  
 FALECIMENTO DO(A) ESPOSO(A)/COMPANHEIRO(A) ..... 05  
 POR SEPARAÇÃO CONJUGAL (do(a) entrevistado(a) ..... 06  
 POR UNIÃO CONJUGAL (do(a) entrevistado(a) ..... 07  
 DIMINUIR DESPESAS ..... 08  
 PELAS CONDIÇÕES DA MORADIA ..... 10  
 (BARREIRAS ARQUITETÔNICAS)  
 QUESTÕES IMOBILIÁRIAS ..... 11  
 OUTRO ..... 09  
 NS ..... *ESPECIFIQUE* ..... 98  
 NR ..... 99

A.11a

Qual é sua religião/credo?

**A. 18**

CATÓLICA ..... 10  
 PROTESTANTE ..... 21  
 EVANGÉLICA ..... 22  
 JUDAICA ..... 30  
 ESPÍRITA KARDECISTA ..... 71  
 BUDISTA ..... 72  
 OUTRO ..... 50  
 \_\_\_\_\_  
*Especifique*  
 NENHUMA ..... 60 → **A. 26**  
 NS ..... 98  
 NR ..... 99

A.11b

Qual a importância da religião em sua vida?

**A. 19**

IMPORTANTE ..... 1  
 REGULAR (+ ou -) ..... 2  
 NADA IMPORTANTE ..... 3  
 NS ..... 8  
 NR ..... 9

A.11c

Com que frequência o(a) Sr.(a) vai a igreja ou ao serviço religioso?

**A. 20**

NUNCA ..... 1  
 VÁRIAS VEZES AO ANO ..... 2  
 UMA OU DUAS VEZES POR MÊS ..... 3  
 QUASE TODA SEMANA ..... 4  
 MAIS DE UMA VEZ POR SEMANA ..... 5  
 NS ..... 8  
 NR ..... 9

**SEÇÃO A - INFORMAÇÕES PESSOAIS**

A.11d

**Quanto, na sua opinião, a sua religião lhe dá FORÇAS PARA ENFRENTAR as dificuldades?**

**A. 21**

|                     |   |
|---------------------|---|
| COMPLETAMENTE ..... | 1 |
| MUITO .....         | 2 |
| NÃO MUITO .....     | 3 |
| NADA.....           | 4 |
| NS .....            | 8 |
| NR .....            | 9 |

A.11e

**Quanto, na sua opinião, sua religião o(a) AJUDA A ENTENDER as dificuldades na vida?**

**A. 22**

|                     |   |
|---------------------|---|
| COMPLETAMENTE ..... | 1 |
| MUITO .....         | 2 |
| NÃO MUITO .....     | 3 |
| NADA.....           | 4 |
| NS .....            | 8 |
| NR .....            | 9 |

A.11f

**Na sua opinião, sua religião DÁ SENTIDO à sua vida?**

**A. 23**

|                 |   |
|-----------------|---|
| TOTALMENTE..... | 1 |
| MUITO.....      | 2 |
| ÀS VEZES.....   | 3 |
| NUNCA.....      | 4 |
| NS.....         | 8 |
| NR .....        | 9 |

A.11g

**Quanto o(a) Sr.(a) SE CONSIDERA religioso(a)?**

**A. 24**

|                |   |
|----------------|---|
| MUITO.....     | 1 |
| UM POUCO.....  | 2 |
| NÃO MUITO..... | 3 |
| NADA.....      | 4 |
| NS.....        | 8 |
| NR.....        | 9 |

A.11h

**Com que frequência o(a) Sr(a) reza (ora) ou realiza suas práticas religiosas?**

**A. 25**

|                                    |   |
|------------------------------------|---|
| VÁRIAS VEZES AO DIA.....           | 1 |
| UMA VEZ AO DIA.....                | 2 |
| VÁRIAS VEZES POR SEMANA.....       | 3 |
| SOMENTE EM OCASIÕES ESPECIAIS..... | 4 |
| QUASE NUNCA OU NUNCA.....          | 5 |
| NS.....                            | 8 |
| NR.....                            | 9 |

A.12

**Qual destas opções o descreve melhor?**

**A. 26**

|                                                          |   |
|----------------------------------------------------------|---|
| BRANCO (de origem européia) .....                        | 1 |
| PARDO / MULATO / MORENO (combinação de branco e preto) . | 3 |
| PRETO .....                                              | 4 |
| INDÍGENA .....                                           | 5 |
| AMARELO .....                                            | 6 |
| OUTRA _____                                              | 7 |
| <i>Especifique</i>                                       |   |
| NS .....                                                 | 8 |
| NR .....                                                 | 9 |

**SEÇÃO A - INFORMAÇÕES PESSOAIS**

A.12a

**O(A) Sr(a) tem algum parente: (mãe ou pai), (avó/avô) ou (bisavó/bisavô) nascido no Japão?**

**A. 27**

**SIM**

- 1ª geração (mãe / pai) ..... 1
- 2ª geração (avó / avô)..... 2
- 3ª geração (bisavó / bisavô) ..... 3
- NÃO ..... 4
- NÃO SABE ..... 8
- NÃO RESPONDE ..... 9

**HISTÓRIA DE UNIÕES**

A.13a

**Com relação ao seu estado marital, alguma vez o(a) Sr.(a) foi casado(a) ou teve uma união livre?**

**A. 28**

- SIM ..... 1
- NÃO ..... 2 →
- NR ..... 9

**A. 32**

A.13b

**No total, quantas vezes, o(a) Sr.(a) esteve casado(a) ou em união?**

**A. 29**

Nº DE VEZES .....|\_|\_|

A.13c

**Qual o seu estado marital hoje?**

**A. 30**

- DIVORCIADO..... 1
- SEPARADO..... 2
- VIÚVO..... 3
- CASADO..... 4
- AMASIADO. .... 5
- SOLTEIRO ..... 6
- NS..... 8
- NR..... 9

**A. 32**

A.13d

**Há quanto tempo o(a) Sr(a) é divorciado(a)/ separado(a) / viúvo(a)?**

UTILIZE A REDAÇÃO CONFORME A SITUAÇÃO

**A. 31**

MESES .....|\_|\_|

ANOS .....|\_|\_|

SEÇÃO A - INFORMAÇÕES PESSOAIS

AGORA QUERO FAZER-LHE ALGUMAS PERGUNTAS SOBRE SUA HISTÓRIA FAMILIAR:

A.18a

Quantos filhos e filhas nascidos vivos o(a) Sr.(a) TEVE?

**A. 32**

NÚMERO DE FILHOS: ..... |\_\_|\_\_| →

Desses filhos, quantos são PRÓPRIOS ..... |\_\_|\_\_|

ENTEADOS..... |\_\_|\_\_|

ADOTIVOS..... |\_\_|\_\_|

NS ..... 98

NR ..... 99

**SE 0 (ZERO)  
VÁ PARA  
A. 34**

A.18b

Quantos filhos e filhas vivos o(a) Sr.(a) TEM HOJE?

(coloque o número total de filhos e, em seguida, especifique por 'tipo')

**A. 33**

NÚMERO TOTAL DE FILHOS VIVOS HOJE: |\_\_|\_\_|

Quantos desses filhos são:

Próprios |\_\_|\_\_|

Enteados |\_\_|\_\_|

Adotivos |\_\_|\_\_|

NS ..... 98

NR..... 99

A.30

As perguntas A.1 a A 33 foram respondidas...

**A. 34**

PELO PRÓPRIO IDOSO ..... 1

IDOSO + INFORMANTE AUXILIAR ..... 2

INFORMANTE SUBSTITUTO ..... 3



SEÇÃO B - AVALIAÇÃO COGNITIVA

A SEÇÃO B SÓ DEVE SER RESPONDIDA PELO(A) IDOSO(A).

NESTE ESTUDO ESTAMOS INVESTIGANDO COMO O(A) SR(A) SE SENTE A RESPEITO DE ALGUNS PROBLEMAS DE SAÚDE. GOSTARIAMOS DE COMEÇAR COM ALGUMAS PERGUNTAS SOBRE SUA MEMÓRIA.

B.1

Como o(a) sr(a) avalia sua memória atualmente? (leia as opções)

**B. 01**

EXCELENTE ..... 1  
 MUITO BOA ..... 2  
 BOA ..... 3  
 REGULAR ..... 4  
 MÁ ..... 5  
 NS ..... 8  
 NR ..... 9

B.2

Comparando com um ano atrás, o(a) sr(a) diria que agora sua memória está melhor, igual ou pior?

**B. 02**

MELHOR ..... 1  
 IGUAL ..... 2  
 PIOR ..... 3  
 NS ..... 8  
 NR ..... 9

B.2a

Durante um minuto, diga o nome de todos os animais que conseguir lembrar.

(ANOTE TUDO O QUE O IDOSO FALAR NO PERÍODO DE UM MINUTO)

**B. 03**

\_\_\_\_\_

\_\_\_\_\_

\_\_\_\_\_

\_\_\_\_\_

\_\_\_\_\_

\_\_\_\_\_

\_\_\_\_\_

\_\_\_\_\_

\_\_\_\_\_

\_\_\_\_\_

NR ..... 99

B.3

Por favor me diga a data de hoje.

PERGUNTE MÊS, DIA, ANO, E DIA DA SEMANA. ANOTE UM PONTO EM CADA RESPOSTA CORRETA

**B. 04**

Correto

DIA DO MÊS ..... |\_\_|\_\_|  Segunda feira ... 01  
 Terça feira ..... 02  
 MÊS ..... |\_\_|\_\_|  Quarta feira ..... 03  
 Quinta feira ..... 04  
 ANO ..... |\_\_|\_\_|  Sexta feira ..... 05  
 Sábado. .... 06  
 DIA DA SEMANA .... |\_\_|\_\_|  Domingo ..... 07

HORA APROXIMADA |\_\_|\_\_| |\_\_|\_\_|  → NÃO SOMAR HORA

TOTAL

**SEÇÃO B - AVALIAÇÃO COGNITIVA**

**B.4**  
Agora vou lhe dar o nome de três objetos. Quando eu terminar lhe pedirei que repita em voz alta todas as palavras que puder lembrar, em qualquer ordem. Guarde quais são porque vou voltar a perguntar mais adiante. O Sr. tem alguma pergunta?

**LEIA OS NOMES DOS OBJETOS DEVAGAR E DE FORMA CLARA SOMENTE UMA VEZ E ANOTE.**

SE O TOTAL É DIFERENTE DE "3":

- 1) REPITA TODOS OS OBJETOS ATÉ QUE O ENTREVISTADO OS APRENDA. MÁXIMO DE REPETIÇÕES: 5 VEZES
- 2) ANOTE O NUMERO DE REPETIÇÕES QUE TEVE QUE FAZER
- 3) NUNCA CORRIJA A PRIMEIRA PARTE
- 4) ANOTA-SE UM PONTO POR CADA OBJETO LEMBRADO E ZERO PARA OS NÃO LEMBRADOS

**B. 05**

|                |                          |                 |
|----------------|--------------------------|-----------------|
|                | Correto                  | Lembrou.....1   |
| ÁRVORE .....   | <input type="checkbox"/> | Não lembrou...0 |
| MESA .....     | <input type="checkbox"/> |                 |
| CACHORRO ..... | <input type="checkbox"/> |                 |
| TOTAL          | <input type="checkbox"/> |                 |

NÚMERO DE REPETIÇÕES: ..... | \_\_\_\_ |

**(FALE DEVAGAR E OLHANDO DE FRENTE PARA O(A) IDOSO(A).)**

**B.5**  
Agora vou dizer alguns números e gostaria que o Sr. repetisse de trás para frente:

**1 3 5 7 9**

**ANOTE A RESPOSTA NO ESPAÇO CORRESPONDENTE.**

**B. 06**

RESPOSTA DO ENTREVISTADO:

|   |   |   |   |   |
|---|---|---|---|---|
| 9 | 7 | 5 | 3 | 1 |
|---|---|---|---|---|

RESPOSTA CORRETA:

**ACERTOS**

Número de dígitos na ordem correta:

**B.6**  
Vou lhe dar um papel e quando eu o entregar, apanhe o papel com sua mão direita, dobre-o na metade com as duas mãos e coloque-o sobre suas pernas.

**PASSE O PAPEL E ANOTE 1 PONTO PARA CADA AÇÃO CORRETA.**

**(FALE DEVAGAR E OLHANDO DE FRENTE PARA O(A) IDOSO(A).)**

**B. 07**

**AÇÃO CORRETA = 1      AÇÃO INCORRETA = 0**

|                                       |                          |
|---------------------------------------|--------------------------|
|                                       | CORRETO                  |
| PEGA O PAPEL COM A MÃO DIREITA.....   | <input type="checkbox"/> |
| DOBRA NA METADE COM AS DUAS MÃOS..... | <input type="checkbox"/> |
| COLOCA O PAPEL SOBRE AS PERNAS.....   | <input type="checkbox"/> |
| TOTAL                                 | <input type="checkbox"/> |

**B.7**  
Há alguns minutos, lí uma série de 3 palavras e o(a) sr(a) repetiu as que lembrou. Por favor, diga-me agora quais ainda se lembra.

**ANOTE 1 PONTO POR RESPOSTA CORRETA EM QUALQUER ORDEM.**

**B. 08**

|                |                          |                 |
|----------------|--------------------------|-----------------|
|                | Correto                  | Lembrou.....1   |
| ÁRVORE .....   | <input type="checkbox"/> | Não lembrou...0 |
| MESA .....     | <input type="checkbox"/> |                 |
| CACHORRO ..... | <input type="checkbox"/> |                 |
| TOTAL          | <input type="checkbox"/> |                 |

**SEÇÃO B - AVALIAÇÃO COGNITIVA**

B.8

Por favor, copie este desenho.

ENTREGUE AO ENTREVISTADO O DESENHO COM OS CÍRCULOS QUE SE CRUZAM. A AÇÃO ESTÁ CORRETA SE OS CÍRCULOS NÃO SE CRUZAM MAIS DO QUE A METADE. ANOTE UM PONTO SE O DESENHO ESTIVER CORRETO

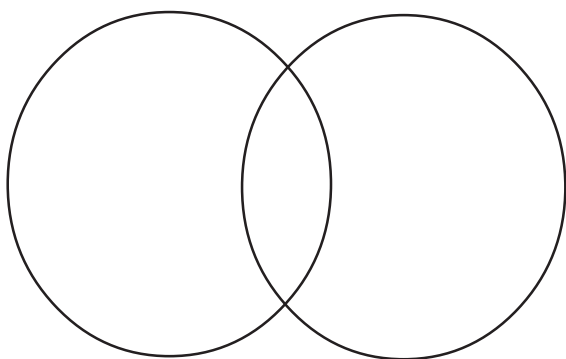

**B. 09**

Correto

TOTAL

**B.9 FILTRO**

SOME AS RESPOSTAS CORRETAS ANOTADAS NAS PERGUNTAS B.04 A B.09 E ANOTE O TOTAL NA CASELA.

(A PONTUAÇÃO MÁXIMA É 19)

**B. 10**

TOTAL

A SOMA É 13 OU MAIS ..... 1 →

**VÁ PARA B.12**

A SOMA É 12 OU MENOS ..... 2

B.9a

Se em **B10** a soma **for 12 ou menos** pergunte se há outra pessoa na casa que possa ajudar a responder o questionário a partir da **SEÇÃO C**.

**B. 11**

HÁ UM INFORMANTE AUXILIAR?

SIM ..... 1

NÃO ..... 2

ANOTE O NOME DO INFORMANTE E APLIQUE A ELE A ESCALA PFEFFER: \_\_\_\_\_

NOME

SEÇÃO B - AVALIAÇÃO COGNITIVA

OBS. AS PERGUNTAS **B31**, **B32** e **B12 A B16** DEVEM SER RESPONDIDAS SÓ PELA PESSOA IDOSA.

B.12

Por favor me diga O LOCAL em que o(a) Sr(a) está

ANOTE UM PONTO EM CADA  
RESPOSTA CORRETA

**B. 31**

Correto

LOCAL DA CASA  (quarto, sala, etc)

LOCAL (CASA OU APTO)

ENDEREÇO

CIDADE

ESTADO

TOTAL

B.13

Por favor, gostaria que o(a) Sr(a) subtraísse 7 de 100 por cinco vezes.

ANOTE A RESPOSTA NO ESPAÇO  
CORRESPONDENTE

**B. 32**

RESPOSTA DO ENTREVISTADO:

RESPOSTA CORRETA:

|    |    |    |    |    |
|----|----|----|----|----|
|    |    |    |    |    |
| 93 | 86 | 79 | 72 | 65 |

respostas corretas:

SEÇÃO B - AVALIAÇÃO COGNITIVA

OBS. AS PERGUNTAS B12 A B16 DEVEM SER RESPONDIDAS SÓ PELA PESSOA IDOSA.

B.14

Mostrar uma caneta e um relógio e pedir para o(a) idoso(a) nomeá-los

**B. 12**

Caneta:

Relógio:

CADA RESPOSTA CORRETA = 1 ponto

Total de pontos:

B.15

Agora, vou dizer uma frase e gostaria que, em seguida, o(a) Sr(a) a repetisse:

**"NEM AQUI, NEM ALI, NEM LÁ"**

**FALE DEVAGAR E OLHANDO DE FRENTE PARA O(A) IDOSO(A).**

**B. 13**

RESPOSTA CORRETA = 1 ponto

Total de pontos:

B.16

Agora, vou lhe mostrar uma frase e gostaria que, em seguida, o(a) Sr(a) fizesse o que leu:

Mostre a frase **"FECHE OS OLHOS"**

**B. 14**

RESPOSTA CORRETA = 1 ponto

Total de pontos:

B.17

Agora, vou lhe **PEDIR PARA ESCREVER** uma frase qualquer:

**B. 15**

\_\_\_\_\_  
\_\_\_\_\_  
\_\_\_\_\_  
\_\_\_\_\_

Total de pontos:

B.18

**Por favor, copie este desenho.**

ENTREGUE AO ENTREVISTADO O DESENHO COM OS PENTÁGONOS QUE SE CRUZAM. A AÇÃO ESTÁ CORRETA SE OS PENTÁGONOS NÃO SE CRUZAM MAIS DO QUE A METADE. ANOTE UM PONTO SE O DESENHO ESTIVER CORRETO.

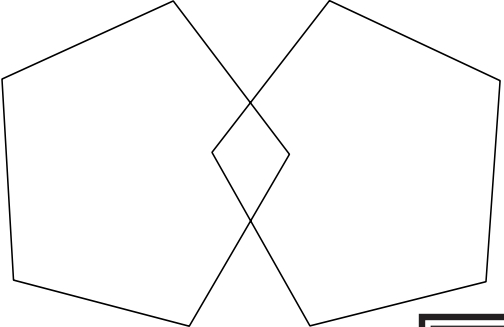

**B. 16**

Correto

TOTAL

## TESTE DO RELÓGIO

ESTE CÍRCULO É UM RELÓGIO. DESENHE OS NÚMEROS QUE HÁ NO RELÓGIO MARCANDO 11 HORAS E 10 MINUTOS.

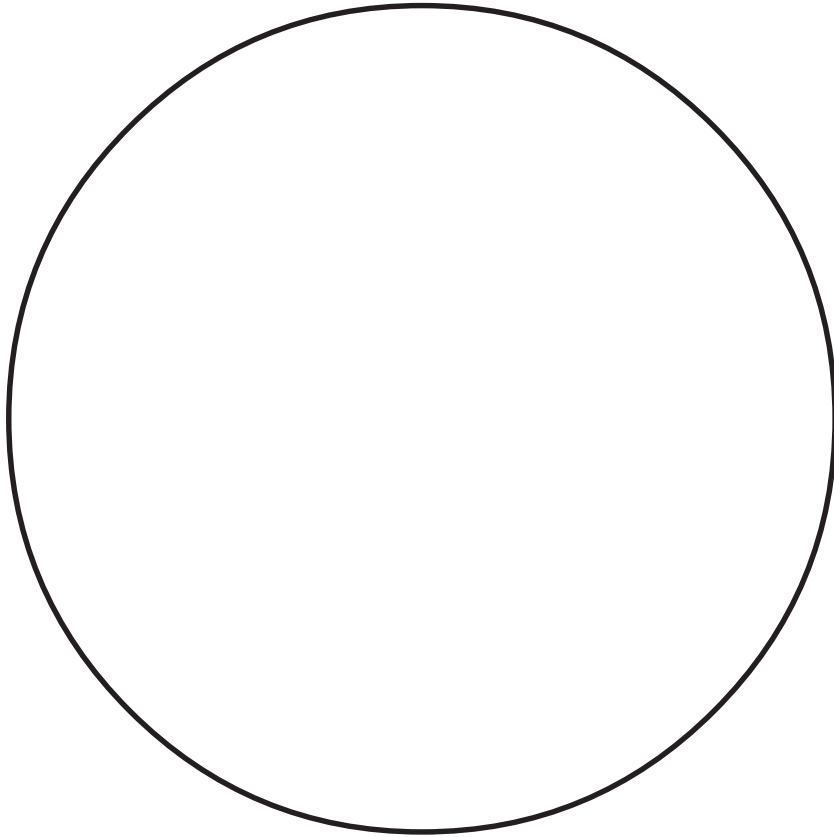

|   |                                                                                                                                                                                                         |
|---|---------------------------------------------------------------------------------------------------------------------------------------------------------------------------------------------------------|
| 0 | Inabilidade absoluta para representar o relógio.                                                                                                                                                        |
| 1 | O desenho tem algo a ver com o relógio mas com desorganização visuoespacial grave.                                                                                                                      |
| 2 | Desorganização visuoespacial moderada que leva à uma marcação de hora incorreta, perseverança, confusão esquerda-direita, números faltando, números repetidos, sem ponteiros, com ponteiros em excesso. |
| 3 | Distribuição visuoespacial correta com marcação errada da hora.                                                                                                                                         |
| 4 | Pequenos erros espaciais com dígitos e hora corretos.                                                                                                                                                   |
| 5 | Relógio perfeito.                                                                                                                                                                                       |

**RESULTADO**

**OBSERVAÇÕES:**

---

---

**SEÇÃO B - AVALIAÇÃO COGNITIVA (ESCALA PFEFFER)**

**SE O(A) IDOSO(A) OBTVEU 12 PONTOS OU MENOS NA QUEST. B10 APLICAR ESTA ESCALA.**

|                                                                                                                 |   |
|-----------------------------------------------------------------------------------------------------------------|---|
| <b>MOSTRE AO INFORMANTE A SEGUINTE CARTELA COM AS OPÇÕES E LEIA AS PERGUNTAS. ANOTE A PONTUAÇÃO COMO SEGUE:</b> |   |
| SIM É CAPAZ .....                                                                                               | 0 |
| NUNCA O FEZ, MAS PODERIA FAZER AGORA .....                                                                      | 0 |
| COM ALGUMA DIFICULDADE, MAS FAZ .....                                                                           | 1 |
| NUNCA FEZ E TERIA DIFICULDADE AGORA .....                                                                       | 1 |
| NECESSITA DE AJUDA .....                                                                                        | 2 |
| NÃO É CAPAZ .....                                                                                               | 3 |

|                                                                                                                             | Pontuação    |
|-----------------------------------------------------------------------------------------------------------------------------|--------------|
| B.10a <b>(NOME)</b> é capaz de cuidar do seu próprio dinheiro?                                                              | <b>B. 17</b> |
| B.10b <b>(NOME)</b> é capaz de fazer as compras sozinho (por exemplo de comida e roupa)?                                    | <b>B. 18</b> |
| B.10c <b>(NOME)</b> é capaz de esquentar água para café ou chá e apagar o fogo?                                             | <b>B. 19</b> |
| B.10d <b>(NOME)</b> é capaz de preparar comida?                                                                             | <b>B. 20</b> |
| B.10e <b>(NOME)</b> é capaz de manter-se a par dos acontecimentos e do que se passa na vizinhança?                          | <b>B. 21</b> |
| B.10f <b>(NOME)</b> é capaz de prestar atenção, entender e discutir um programa de radio, televisão ou um artigo do jornal? | <b>B. 22</b> |
| B.10g <b>(NOME)</b> é capaz de lembrar de compromissos e acontecimentos familiares?                                         | <b>B. 23</b> |
| B.10h <b>(NOME)</b> é capaz de cuidar de seus próprios medicamentos?                                                        | <b>B. 24</b> |
| B.10i <b>(NOME)</b> é capaz de andar pela vizinhança e encontrar o caminho de volta para casa?                              | <b>B. 25</b> |
| B.10j <b>(NOME)</b> é capaz de cumprimentar seus amigos adequadamente?                                                      | <b>B. 26</b> |
| B.10k <b>(NOME)</b> é capaz de ficar sozinho(a) em casa sem problemas?                                                      | <b>B. 27</b> |

**B.11 FILTRO**

**Some os pontos das perguntas B.17 a B.27 e anote na casela denominada "TOTAL".**

**B. 28**

TOTAL

A soma é 6 ou mais..... 1 →

A soma é 5 ou menos..... 2 →

**CONTINUE A ENTREVISTA COM AJUDA DO INFORMANTE SUBSTITUTO. REVISE A SEÇÃO A**

**CONTINUE A ENTREVISTA COM O ENTREVISTADO. CASO A PESSOA NECESSITE DE AJUDA PARA RESPONDER ALGUMAS PERGUNTAS, CONTINUE COM UM INFORMANTE AUXILIAR**

SEÇÃO C - ESTADO DE SAÚDE

**OBSERVAÇÃO:**  
**Somente o(a) idoso(a) pode responder as perguntas C1, C2 e C3.**  
**Se ele não puder responder assinale "NR"**

C.1

Agora gostaria de lhe fazer algumas perguntas sobre a sua saúde. O(a) Sr(a) diria que sua saúde é ...

**C. 01**

- MUITO BOA ..... 2
- BOA ..... 3
- REGULAR ..... 4
- RUIM ..... 6
- MUITO RUIM ..... 7
- NS ..... 8
- NR ..... 9

C.2

Comparando sua saúde de **HOJE** com a de **DOZE MESES ATRÁS**, o(a) Sr(a) diria que agora sua saúde está...

**C. 02**

- MELHOR ..... 1
- IGUAL ..... 2
- PIOR ..... 3
- NS ..... 8
- NR ..... 9

C.3

Comparando-se com outras pessoas de sua idade, o(a) Sr(a) diria que sua saúde é ...

**C. 03**

- MELHOR ..... 1
- IGUAL ..... 2
- PIOR ..... 3
- NS ..... 8
- NR ..... 9

C.3a

Pense nas **DUAS ÚLTIMAS SEMANAS** e me diga por quantos dias o(a) Sr(a) deixou de realizar suas atividades habituais por motivo de saúde:

**C. 04**

- NÚMERO DE DIAS..... | | | |
- NS ..... 98
- NR ..... 99

C.3c

Pense nas **DUAS ÚLTIMAS SEMANAS** e me diga por quantos dias o Sr(a) esteve acamado?

**C. 05**

- NÚMERO DE DIAS ..... | | | |
- NS ..... 98
- NR ..... 99

**HIPERTENSÃO**

C.4

Alguma vez um médico ou enfermeiro lhe disse que o(a) Sr(a) tem pressão sanguínea alta, quer dizer, HIPERTENSÃO?

**C. 06**

- SIM ..... 1
  - QUANDO? \_\_\_\_\_ (ANO)
  - NÃO ..... 2
  - NS ..... 8
  - NR ..... 9
- C. 13**



**SEÇÃO C - ESTADO DE SAÚDE**

C.4g

Para baixar ou controlar sua pressão sangüínea, o(a) Sr(a):

**ASSINALE TODAS AS RESPOSTAS DO(A) IDOSO(A).**

**C. 07**

- NÃO FAZ NADA ..... 1
- TOMAMEDICAMENTO ..... 2
- FAZ DIETA / COME COM POUCO SAL ..... 3
- PERDEU PESO ..... 4
- FAZ EXERCÍCIOS / ATIV. FÍSICA ..... 5
- OUTRO ..... 6
- \_\_\_\_\_
- Especifique*
- NS ..... 8
- NR ..... 9

Vá para  
C.9

C.4h

Porquê?

**C. 08**

- NÃO SENTE NECESSIDADE ..... 1
- NUNCA FOI ORIENTADO / NÃO SABIA ..... 2
- FOI ORIENTADO MAS NÃO GOSTA / NÃO CONSEGUE ..... 3
- OUTRO ..... 4
- \_\_\_\_\_
- Especifique*
- NS ..... 8
- NR ..... 9

C.4e

O(a) Sr.(a) costuma ir ao serviço de saúde para controle de sua HIPERTENSÃO ?

**C. 09**

- NUNCA ..... 1
- SIM, UMA OU MAIS VEZES AO MÊS ..... 2
- SIM, A CADA DOIS OU 3 MESES ..... 3
- SIM, A CADA 6 MESES ..... 4
- SIM, PELO MENOS UMA VEZ POR ANO ..... 5
- QUANDO NÃO ME SINTO BEM ..... 6
- NS ..... 8
- NR ..... 9

C.4c

**Na sua opinião**, sua pressão sangüínea geralmente está controlada, ou seja, nos níveis considerados normais?

**C. 10**

- SIM ..... 1
- NÃO ..... 2
- NS ..... 8
- NR ..... 9

## SEÇÃO C - ESTADO DE SAÚDE

C.4d

Em comparação com 12 meses atrás, na sua opinião, seu problema de pressão alta está:

**C. 11**

MELHOR ..... 1  
 IGUAL ..... 2  
 PIOR ..... 3  
 NS ..... 8  
 NR ..... 9

C.4f

Alguma vez, o(a) Sr.(a) precisou ser hospitalizado, por PELO MENOS UMA NOITE por causa de sua hipertensão?

**C. 12**

NUNCA ..... 1  
 SIM, UMA VEZ..... 2  
 SIM, DUAS OU 3 VEZES..... 3  
 SIM, MAIS DE 3 VEZES..... 4  
 NS ..... 8  
 NR ..... 9

## DIABETES

C.5

Alguma vez um médico ou enfermeiro lhe disse que o(a) Sr(a) tem DIABETES, quer dizer, níveis altos de açúcar no sangue?

**C. 13**

SIM ..... 1  
 QUANDO? \_\_\_\_\_ (ANO)  
 NÃO ..... 2  
 NS ..... 8  
 NR ..... 9

**C.32**

C.5a3

Para controlar seu diabetes ou ajudar a baixar os níveis de açúcar no sangue o(a) Sr(a):

**C.14**

NÃO FAZ NADA ..... 1  
 FAZ DIETA ..... 2  
 NÃO INGERE AÇÚCAR/ DOCES ..... 3  
 PERDEU PESO ..... 4  
 FAZ EXERCÍCIOS/ ATIVIDADE FÍSICA ..... 5  
 OUTRO ..... 6  
 \_\_\_\_\_  
*Especifique*  
 NS ..... 8  
 NR ..... 9

C.5a1

Para tratar seu diabetes o(a) Sr(a) toma...

**C. 15**

NADA ..... 1  
 MEDICAMENTO ORAL ..... 2  
 INSULINA ..... 3  
 MEDICAÇÃO ORAL E INSULINA ..... 4  
 NS ..... 8  
 NR ..... 9

C.5d9

O(a) Sr.(a) costuma verificar/medir sua glicemia, ou seja, o nível de açúcar no seu sangue?

**C. 16**

**SIM:**  
 FAÇO EXAME DE SANGUE NO LABORATÓRIO ..... 1  
 VERIFICO COM FITAS DOSADORAS NO SANGUE QUE TIRO DO DEDO DA MÃO ..... 3  
 OUTRO ..... 5  
 \_\_\_\_\_  
*Especifique*  
 NÃO COSTUMO VERIFICAR ..... 4 →  
 NS ..... 8  
 NR ..... 9

**C.18**

**SEÇÃO C - ESTADO DE SAÚDE**

C.5d10

Com que frequência o(a) Sr.(a) costuma verificar o nível de seu açúcar no sangue?

**C. 17**

- ANTES DE IR À CONSULTA MÉDICA ..... 1
- QUANDO NÃO ME SINTO BEM ..... 2
- DIARIAMENTE ..... 3
- OUTROS \_\_\_\_\_ 4
- ESPECIFIQUE*
- NS ..... 8
- NR ..... 9

**C. 19**

C.5d11

Por que o(a) Sr(a) não costuma verificar sua glicemia ou seja os níveis de açúcar no seu sangue?

**C. 18**

- NÃO ACHOU NECESSÁRIO ..... 1
- NUNCA FUI ORIENTADO / NÃO SABIA ..... 6
- FUI ORIENTADO MAS NÃO GOSTA / NÃO CONSEGUE ..... 7
- OUTRO ..... 5
- \_\_\_\_\_
- Especifique*
- NS ..... 8
- NR ..... 9

C.5d

Na sua opinião, seu diabetes, geralmente, está controlado?

**C. 19**

- SIM ..... 1
- NÃO ..... 2
- NS ..... 8
- NR ..... 9

C.5e

Em comparação com 12 meses atrás, na sua opinião, seu diabetes está ...

**C.20**

- MELHOR ..... 1
- IGUAL ..... 2
- PIOR ..... 3
- NS ..... 8
- NR ..... 9

C.5e1

**Como consequência do seu diabetes o(a) Sr.(a) tem (teve) algum problema/ complicação?**

**ASSINALE TODAS AS ALTERNATIVAS REFERIDAS PELO(A) IDOSO(A).**

**C. 21**

- SIM, NOS RINS ..... 1
- SIM, NOS OLHOS ..... 2
- SIM, DE CIRCULAÇÃO ..... 3
- SIM, NOS PÉS ..... 4
- SIM, OUTROS: \_\_\_\_\_ 5
- ESPECIFIQUE*
- NÃO ..... 6
- NS ..... 8
- NR ..... 9

**C. 23**

**SEÇÃO C - ESTADO DE SAÚDE**

C.5h

O Sr.(a) faz (fez) tratamento para seu problema nos rins?

**ANOTAR TODAS AS RESPOSTAS**

**C. 22**

SIM, MEDICAÇÃO/DIETA ..... 1  
 SIM, DIALISE PERITONIAL ..... 2  
 SIM, HEMODIÁLISE..... 3  
 SIM, TRANSPLANTE..... 4  
 NÃO..... 5  
 NS ..... 8  
 NR ..... 9

C.5m

O(a) Sr.(a) sabe que o diabetes pode afetar a sua visão?

**C. 23**

SIM..... 1  
 NÃO..... 2  
 NS ..... 8  
 NR ..... 9

C.5n

Por causa do diabetes o (a) Sr.(a) foi encaminhado ao oculista?

**C. 24**

SIM..... 1  
 NÃO..... 2  
 NS ..... 8  
 NR ..... 9

C.5j

Como conseqüência do seu diabetes o(a) Sr.(a) teve que amputar alguma parte do seu corpo?

**C. 25**

SIM ..... 1  
 QUAL? \_\_\_\_\_  
 NÃO ..... 2  
 NS ..... 8  
 NR ..... 9

C.5k

Com que frequência o(a) Sr.(a) vai aos serviços de saúde para controlar o seu diabetes?

**C. 26**

NUNCA ..... 1  
 SIM, UMA OU MAIS VEZES POR MÊS ..... 2  
 SIM, A CADA DOIS OU TRÊS MESES ..... 3  
 SIM, A CADA SEIS MESES ..... 4  
 SIM, PELO MENOS UMA VEZ POR ANO ..... 5  
 SIM, QUANDO ACHO NECESSÁRIO ..... 6  
 NS ..... 8  
 NR ..... 9

C.5l

Alguma vez o(a) Sr.(a) precisou ser hospitalizado por **PELO MENOS UMA NOITE** por causa de seu diabetes?

**C. 27**

NUNCA ..... 1  
 SIM, UMA VEZ..... 2  
 SIM, DUAS OU TRÊS VEZES..... 3  
 SIM, MAIS DE TRÊS VEZES ..... 4  
 NS ..... 8  
 NR ..... 9

**SEÇÃO C - ESTADO DE SAÚDE**

C.5d1

O(A) Sr(a) já apresentou hipoglicemia ou açúcar baixo no sangue?

**C. 28**

SIM ..... 1  
 NÃO ..... 2 → **C. 30**  
 NS ..... 8  
 NR ..... 9

C.5d4

O que o(a) Sr(a) fez na última vez que apresentou esse(s) sintomas ?

ANOTAR ATÉ 3  
 RESPOSTAS.

**C. 29**

NADA ..... 1  
 TOMOU LÍQUIDOS COM AÇÚCAR OU CHUPOU BALA ..... 2  
 PROCUROU ASSISTÊNCIA MÉDICA (HOSPITAL,  
 PRONTO-SOCORRO OU POSTO DE SAÚDE) ..... 4  
 ALIMENTOU-SE ..... 3  
 OUTROS ..... 5  
ESPECIFIQUE  
 NS ..... 8  
 NR ..... 9

C.5d5

O(A) Sr(a) já apresentou hiperglicemia ou açúcar elevado no sangue?

**C. 30**

SIM ..... 1  
 NÃO ..... 2 → **C. 32**  
 NS ..... 8  
 NR ..... 9

C.5d8

O que o(a) Sr(a) fez na última vez que apresentou esse(s) sintomas ?

**C. 31**

NADA ..... 1  
 TOMOU MEDICAÇÃO (ORAL OU INSULINA) ..... 2  
 PROCUROU ASSISTÊNCIA MÉDICA (HOSPITAL,  
 PRONTO-SOCORRO OU POSTO DE SAÚDE) ..... 4  
 OUTROS ..... 5  
ESPECIFIQUE  
 NS ..... 8  
 NR ..... 9

**AGORA GOSTARIA DE LHE FAZER ALGUMAS PERGUNTAS SOBRE SEUS PULMÕES:**

C.7

Alguma vez um médico ou enfermeiro lhe disse que tem **ALGUMA DOENÇA CRÔNICA DO PULMÃO**, como asma, bronquite ou enfisema?

**OBS.: PNEUMONIA e GRIPE NÃO SÃO doenças crônicas.**

**C. 32**

SIM ..... 1  
 QUAL? \_\_\_\_\_ QUANDO? \_\_\_\_\_ (ANO)  
 QUAL? \_\_\_\_\_ QUANDO? \_\_\_\_\_ (ANO)  
 NÃO ..... 2  
 NS ..... 8  
 NR ..... 9 } **C. 38**

SEÇÃO C - ESTADO DE SAÚDE

C.7a1

O(a) Sr(a) recebe algum medicamento ou está recebendo algum outro tratamento para sua doença crônica do pulmão?

**ASSINALE TODAS AS ALTERNATIVAS CITADAS PELO(A) IDOSO(A).**

**C. 33**

- SIM
- OXIGÊNIOCONTÍNUO ..... 1
- OXIGÊNIOQUANDONECESSÁRIO ..... 2
- TOMAMEDICAMENTO ..... 3
- FAZFISIOTERAPIA ..... 4
- OUTRO \_\_\_\_\_ 5  
*Especifique*
- NÃO ..... 6
- NS ..... 8
- NR ..... 9

C.7b

Em comparação com doze meses atrás, sua doença pulmonar está...

**C. 34**

- MELHOR ..... 1
- IGUAL ..... 2
- PIOR ..... 3
- NS ..... 8
- NR ..... 9

C.7e

Na sua opinião, quanto sua doença pulmonar limita suas atividades diárias como trabalhar ou fazer suas tarefas domésticas?

**C. 35**

- MUITO ..... 1
- POUCO ..... 2
- NÃO INTERFERE ..... 3
- NS ..... 8
- NR ..... 9

C.7g

Com que frequência o(a) Sr (a) vai aos serviços de saúde por causa de sua doença crônica do pulmão?

**C. 36**

- NUNCA ..... 1
- SIM, VÁRIAS VEZES NA SEMANA ..... 2
- SIM, UMA VEZ NO MÊS ..... 3
- SIM, A CADA DOIS OU TRÊS MESES ..... 4
- SIM, A CADA SEIS MESES ..... 5
- SIM, PELO MENOS UMA VEZ POR ANO. .... 6
- SIM, QUANDONECESSÁRIO. .... 7
- NS ..... 8
- NR ..... 9

C.7h

Alguma vez o(a) Sr(a) precisou ser hospitalizado por pelo **MENOS UMA NOITE** por causa da sua doença crônica do pulmão?

**C. 37**

- NUNCA ..... 1
- SIM, UMA VEZ..... 2
- SIM, DUAS OU TRÊS VEZES..... 3
- SIM, MAIS DE TRÊS VEZES..... 4
- NS ..... 8
- NR ..... 9

SEÇÃO C - ESTADO DE SAÚDE

**AGORA GOSTARIA DE LHE FAZER ALGUMAS PERGUNTAS SOBRE SEU CORAÇÃO:**

C.8

Alguma vez um médico ou enfermeiro lhe disse que o(a) Sr(a) tem **ALGUM PROBLEMA ou DOENÇA NO CORAÇÃO**, como doença congestiva, doença coronariana ou infarto (ataque do coração)?

QUAL: \_\_\_\_\_

OBS: excluir dessa pergunta a **HIPERTENSÃO**.

**C. 38**

SIM ..... 1  
 QUANDO? \_\_\_\_\_ (ANO)  
 (PARA DOENÇA)  
 QUANDO? \_\_\_\_\_ (ANO)  
 (PARA INFARTO)  
 NÃO ..... 2  
 NS ..... 8  
 NR ..... 9

**C. 45**

C.8b

Nos últimos 12 meses seu problema de coração está ....

**C. 39**

MELHOR ..... 1  
 IGUAL ..... 2  
 PIOR ..... 3  
 NS ..... 8  
 NR ..... 9

C.8c

O(a) Sr(a) toma algum medicamento para seu problema cardíaco?

**C. 40**

SIM ..... 1  
 NÃO ..... 2  
 NS ..... 8  
 NR ..... 9

C.8d

Com que frequência o(a) Sr (a) vai aos serviços de saúde por causa de seu problema de coração?

**C. 41**

NUNCA ..... 2  
 SIM, UMA OU MAIS VEZES POR MÊS ..... 3  
 SIM, A CADA DOIS OU TRÊS MESES ..... 4  
 SIM, A CADA SEIS MESES ..... 5  
 SIM, PELO MENOS UMA VEZ POR ANO ..... 6  
 SIM, QUANDO NECESSÁRIO ..... 7  
 NS ..... 8  
 NR ..... 9

C.8e

Alguma vez o(a) Sr.(a) precisou ser hospitalizado por **PELO MENOS UMA NOITE** por causa de seu problema no coração?

**C. 42**

NUNCA ..... 6  
 SIM, UMA VEZ ..... 3  
 SIM, DUAS OU TRÊS VEZES ..... 4  
 SIM, MAIS DE TRÊS VEZES ..... 5  
 NS ..... 8  
 NR ..... 9

C.8f

Na sua opinião, quanto seu problema de coração interfere no seu trabalho ou em suas atividades domésticas?

**C. 43**

MUITO ..... 1  
 POUCO ..... 2  
 NÃO INTERFERE ..... 3  
 NS ..... 8  
 NR ..... 9

## SEÇÃO C - ESTADO DE SAÚDE

C.8g

Em consequência de sua doença cardíaca o(a) Sr(a) fez algum tratamento especial?

OBS.: **CATETERISMO** é um exame; se o(a) idoso(a) fez esse exame e dilatou artérias (colocou stent) assinale **ANGIOPLASTIA**.

**C. 44**

SIM, ANGIOPLASTIA (DILATAÇÃO ARTERIAL) .... 1  
 SIM, COLOCOU MARCA PASSO ..... 2  
 SIM, CIRURGIA (PONTE, REVASCULARIZAÇÃO) ... 3  
 SIM, TRANSPLANTE ..... 5  
 NÃO ..... 4  
 NS ..... 8  
 NR ..... 9

## DERRAMES / AVC

C.9

Alguma vez algum médico ou enfermeira disse que o(a) Sr(a) teve um **DERRAME** ou **ISQUEMIA** cerebral (também chamado **EMBOLIA** ou **AVC**? (Incluir **ANEURISMA**).

**C. 45**

SIM ..... 1  
 QUANDO? \_\_\_\_\_ (ANO DO ÚLTIMO)  
 NÃO ..... 2  
 NS ..... 8  
 NR ..... 9

**C. 55**

C.9c

O(a) Sr(a) ficou com alguma seqüela ou problema derivado do(s) derrame(s) cerebral(is)?

**C. 46**

SIM ..... 1  
 NÃO ..... 2  
 NS ..... 8  
 NR ..... 9

**C. 55**

## DEPOIS DO DERRAME, O(A) SENHOR(A) PASSOU A APRESENTAR...

C.9d

Alguma fraqueza nos braços e nas pernas ou dificuldade de movimentar ou usar seus braços ou pernas?

**C. 47**

SIM ..... 1  
 NÃO ..... 2  
 NS ..... 8  
 NR ..... 9

C.9e

Dificuldade para falar?

**C. 48**

SIM ..... 1  
 NÃO ..... 2  
 NS ..... 8  
 NR ..... 9

C.9e1

Alguma dificuldade para engolir?

**C. 49**

SIM, QUALQUER ALIMENTO ..... 1  
 SIM, APENAS LÍQUIDOS ..... 2  
 SIM, APENAS SÓLIDOS ..... 3  
 NÃO ..... 4  
 NS ..... 8  
 NR ..... 9

C.9f

Depois do derrame o(a) Sr(a). passou a ter dificuldade **COM SUA VISÃO**?

**C. 50**

SIM ..... 1  
 NÃO ..... 2  
 NS ..... 8  
 NR ..... 9



## SEÇÃO C - ESTADO DE SAÚDE

C.9g

Depois do derrame o(a) Sr(a). passou a ter dificuldade para **PENSAR** ou **ENCONTRAR** as palavras certas?

**C. 51**

SIM ..... 1  
 NÃO ..... 2  
 NS ..... 8  
 NR ..... 9

C.9g1

Depois do derrame o(a) Sr(a). passou a ter dificuldade com a sua **MEMÓRIA**?

**C. 52**

SIM ..... 1  
 NÃO ..... 2  
 NS ..... 8  
 NR ..... 9

C.9j

Quanto as sequelas ou complicações após o derrame interferem em suas atividades diárias?

**C. 53**

MUITO ..... 1  
 POUCO ..... 2  
 NADA ..... 3  
 NS ..... 8  
 NR ..... 9

C.9i

O(a) Sr(a). recebe ou recebeu algum tipo de **TRATAMENTO DE REABILITAÇÃO** por causa do derrame ou suas complicações?

ANOTAR ATÉ 3  
 RESPOSTAS.

**C. 54**

SIM, FISIOTERAPIA ..... 3  
 SIM, TERAPIA OCUPACIONAL ..... 4  
 SIM, FONOAUDIOLOGIA ..... 5  
 NÃO ..... 2  
 NS ..... 8  
 NR ..... 9

## DOENÇA ARTICULAR

C.10

Alguma vez um médico ou enfermeira disse que o(a) Sr(a). tem alguma **DOENÇA ARTICULAR** (nas articulações ou juntas) tais como: artrite, reumatismo, artrose?

**OBS.: Articulação** é a parte do corpo que "junta" um osso a outro. Como ela "dobra", permite o movimento (ex: joelhos, cotovelos, tornozelos, punhos, etc)

**C. 55**

SIM ..... 1  
 QUANDO? \_\_\_\_\_ (ANO)  
 QUE DOENÇA O SR(A) TEM? \_\_\_\_\_  
 NÃO ..... 2  
 NS ..... 8  
 NR ..... 9

**C. 62**

C.10b

Em comparação com 12 meses atrás, sua **DOENÇA ARTICULAR** está.....

**C. 56**

MELHOR ..... 1  
 IGUAL ..... 2  
 PIOR ..... 3  
 NS ..... 8  
 NR ..... 9

C.10c

Nos últimos 12 meses o(a) Sr(a) consultou um médico especificamente por causa de sua **DOENÇA ARTICULAR**?

**C. 57**

SIM ..... 1  
 NÃO ..... 2  
 NS ..... 8  
 NR ..... 9

**SEÇÃO C - ESTADO DE SAÚDE**

C.10d

O(a) Sr(a) está tomando algum medicamento ou está recebendo tratamento para sua **DOENÇA ARTICULAR**?

**C. 58**

|           |   |               |
|-----------|---|---------------|
| SIM ..... | 1 | } <b>C.60</b> |
| NÃO ..... | 2 |               |
| NS .....  | 8 |               |
| NR .....  | 9 |               |

C.10d1

Foi prescrito pelo médico?

**C. 59**

|           |   |
|-----------|---|
| SIM ..... | 1 |
| NÃO ..... | 2 |
| NS .....  | 8 |
| NR .....  | 9 |

C.10f

O(a) Sr.(a) sofreu alguma cirurgia por causa de sua **DOENÇA ARTICULAR**?

**C. 60**

|           |   |               |
|-----------|---|---------------|
| SIM ..... | 1 | } <b>C.62</b> |
| NÃO ..... | 2 |               |
| NS .....  | 8 |               |
| NR .....  | 9 |               |

C.10g

Qual articulação foi operada?

**C. 61**

|                      |                    |
|----------------------|--------------------|
| QUADRIL/BACIA .....  | 1                  |
| JOELHOS .....        | 2                  |
| TORNOZELOS/PÉS ..... | 4                  |
| MÃOS/DEDOS .....     | 5                  |
| OMBRO(S) .....       | 6                  |
| OUTRO LOCAL _____    | 3                  |
|                      | <i>ESPECIFIQUE</i> |
| NS .....             | 8                  |
| NR .....             | 9                  |

C.10a2

O(a) Sr.(a) sente **DOR** ou **DESCONFORTO** quando faz algum **ESFORÇO FÍSICO** ou **MOVIMENTO** como por exemplo levantar e andar?

**C. 62**

|                           |   |               |
|---------------------------|---|---------------|
| SIM .....                 | 1 | } <b>C.64</b> |
| DESDE QUANDO? _____ (ANO) |   |               |
| NÃO .....                 | 2 |               |
| NS .....                  | 8 |               |
| NR .....                  | 9 |               |

C.10a3

Em que local o(a) Sr(a). sente dor ou desconforto quando faz esforço físico ou se movimenta?

**OBS.:** Anotar até no máximo 3 alternativas (as mais importantes).

**C. 63**

|                                          |                    |
|------------------------------------------|--------------------|
| NAS COSTAS (lombalgia/ dor lombar) ..... | 1                  |
| NO QUADRIL/BACIA .....                   | 2                  |
| NOS JOELHOS.....                         | 3                  |
| NOS TORNOZELOS/PÉS.....                  | 4                  |
| NAS MÃOS.....                            | 5                  |
| NO CORPO TODO.....                       | 6                  |
| NO(S) OMBRO(S) .....                     | 7                  |
| OUTRO LOCAL _____                        | 8                  |
|                                          | <i>ESPECIFIQUE</i> |
| NS .....                                 | 98                 |
| NR .....                                 | 99                 |

SEÇÃO C - ESTADO DE SAÚDE

C.10e

Quanto sua **doença articular** e/ou **essa dor** ou **desconforto** interferem em suas atividades diárias?

**C.64**

|             |   |
|-------------|---|
| MUITO ..... | 1 |
| POUCO ..... | 2 |
| NADA .....  | 3 |
| NS .....    | 8 |
| NR .....    | 9 |

**NESTE ESTUDO TAMBÉM ESTAMOS INVESTIGANDO A PRESENÇA DE OUTRAS DORES QUE NÃO AS RELACIONADAS ÀS ARTICULAÇÕES.**

**AS PERGUNTAS A SEGUIR DIZEM RESPEITO A QUALQUER OUTRO TIPO DE DOR QUE O(A) SR(A) SINTA.**

C.10h

O(a) Sr(a) tem alguma **DOR** há mais de 3 meses, que dói continuamente ou que vai e vem pelo menos uma vez por mês?

**EXCLUIR A DOR ARTICULAR**

**C.65**

|           |   |
|-----------|---|
| SIM ..... | 1 |
| NÃO ..... | 2 |
| NS .....  | 8 |
| NR .....  | 9 |

**C. 74**

C.10i

Em que local(ais) o(a) Sr(a) tem essas dores?

**OBS.:** Anotar até no máximo 5 alternativas (as mais importantes).

**C. 66**

|                                                  |    |
|--------------------------------------------------|----|
| CABEÇA, FACE E/OU BOCA.....                      | 1  |
| PESCOÇO .....                                    | 2  |
| OMBROS E BRAÇOS .....                            | 3  |
| PEITO.....                                       | 4  |
| COSTAS (acima da cintura).....                   | 5  |
| COSTAS (na cintura e abaixo-região lombar) ..... | 6  |
| ABDOMEM (barriga) .....                          | 7  |
| PERNAS .....                                     | 8  |
| PELVE.....                                       | 9  |
| REGIÃO ANAL E GENITAL .....                      | 10 |
| NS .....                                         | 98 |
| NR .....                                         | 99 |

**SE  
RESPONDER  
SÓ UMA  
VÁ PARA  
C.68**

C.10j

De todos esses locais, qual é o **LOCAL DA DOR** que **MAIS** o(a) incomoda?

**ASSINALE O MAIS IMPORTANTE  
(APENAS UM LOCAL)**

**C. 67**

|                                                  |    |
|--------------------------------------------------|----|
| CABEÇA, FACE E/OU BOCA.....                      | 1  |
| PESCOÇO .....                                    | 2  |
| OMBROS E BRAÇOS .....                            | 3  |
| PEITO.....                                       | 4  |
| COSTAS (acima da cintura).....                   | 5  |
| COSTAS (na cintura e abaixo-região lombar) ..... | 6  |
| ABDOMEM (barriga) .....                          | 7  |
| PERNAS .....                                     | 8  |
| PELVE.....                                       | 9  |
| REGIÃO ANAL E GENITAL .....                      | 10 |
| NS .....                                         | 98 |
| NR .....                                         | 99 |

## SEÇÃO C - ESTADO DE SAÚDE

**C.10k**

Há quanto tempo o(a) Sr(a). sente essa dor?

**C.68**

|                       |   |
|-----------------------|---|
| 3 a 6 meses .....     | 1 |
| 6 meses a 1 ano ..... | 2 |
| 1 a 2 anos .....      | 3 |
| mais de 2 anos .....  | 4 |
| NS .....              | 8 |
| NR .....              | 9 |

**C.10l**

Essa dor (a que mais o(a) incomoda) é?

**C.69**

|                                   |   |
|-----------------------------------|---|
| MUITO FORTE / MUITO INTENSA ..... | 1 |
| FORTE / INTENSA .....             | 2 |
| MÉDIA / MODERADA .....            | 3 |
| FRACA .....                       | 4 |
| NS .....                          | 8 |
| NR .....                          | 9 |

**C.10m**

Essa dor (a que mais o(a) incomoda) dói em média?

**C.70**

|                                    |   |
|------------------------------------|---|
| QUASE TODOS OS DIAS .....          | 1 |
| UMA OU DUAS VEZES POR SEMANA ..... | 2 |
| UMA VEZ A CADA 15 DIAS .....       | 3 |
| UMA VEZ POR MÊS .....              | 4 |
| NS .....                           | 8 |
| NR .....                           | 9 |

**C.10n**

O que essa **DOR** (a que mais o(a) incomoda) prejudica mais?

**OBS.:** Anotar até no máximo 3 alternativas (as mais importantes).

**C.71**

|                                                                                 |    |
|---------------------------------------------------------------------------------|----|
| SONO .....                                                                      | 1  |
| HUMOR .....                                                                     | 2  |
| ANDAR .....                                                                     | 3  |
| APETITE .....                                                                   | 4  |
| LAZER .....                                                                     | 5  |
| TRABALHO .....                                                                  | 6  |
| ATIVIDADE SEXUAL .....                                                          | 7  |
| RELACIONAMENTO COM AS PESSOAS .....                                             | 8  |
| FAZER COMPRAS / IR AO BANCO .....                                               | 9  |
| CUIDAR DE SI MESMO (tomar banho, vestir-se, alimentar-se, ir ao banheiro) ..... | 10 |
| NÃO ATRAPALHA EM NADA .....                                                     | 11 |
| OUTROS _____                                                                    | 12 |
| _____ <i>ESPECIFIQUE</i>                                                        |    |
| NS .....                                                                        | 98 |
| NR .....                                                                        | 99 |

**C.10o**

Dê uma nota de 0 (zero) a 10 (dez) ao quanto o(a) Sr(a) acha que essa dor o incomoda na atividade citada:

**0 (zero) = nenhum prejuízo**  
**10 (dez) = prejuízo total**

**C.72**

|            |           |
|------------|-----------|
| NOTA ..... | ____ ____ |
| NS .....   | 98        |
| NR .....   | 99        |

## SEÇÃO C - ESTADO DE SAÚDE

**C.10p**

Para melhorar essa dor (a que mais o incomoda), o(a) Sr(a):

**ASSINALE SOMENTE A MAIS IMPORTANTE**

**C.73**

|                                           |    |
|-------------------------------------------|----|
| TOMOREMÉDIO(S) .....                      | 1  |
| APLICO CALOR E FRIO NO LOCAL DA DOR ..... | 2  |
| FAÇO MASSAGEM .....                       | 3  |
| PRATICO EXERCÍCIOS FÍSICOS .....          | 4  |
| FAÇO REPOUSO .....                        | 5  |
| TOMO CHÁ(S) .....                         | 6  |
| APLICO POMADA(S)/EMPLASTRO .....          | 7  |
| OUTRO _____                               | 8  |
| <i>ESPECIFIQUE</i>                        |    |
| NS .....                                  | 98 |
| NR .....                                  | 99 |

## OSTEOPOROSE

**C.11e**

Alguma vez um médico ou enfermeiro disse que o sr. tem **OSTEOPOROSE** (osso fraco)?

**C.74**

|                     |   |
|---------------------|---|
| SIM .....           | 1 |
| QUANDO? _____ (ANO) |   |
| NÃO .....           | 2 |
| NS .....            | 8 |
| NR .....            | 9 |

**C.76**

**C. 11e1**

O(a) Sr(a) está tomando algum medicamento ou está recebendo tratamento para sua **OSTEOPOROSE**?

**C.75**

|           |   |
|-----------|---|
| SIM ..... | 1 |
| NÃO ..... | 2 |
| NS .....  | 8 |
| NR .....  | 9 |

## DEPRESSÃO

**C.20**

Alguma vez um médico ou enfermeiro lhe disse que tem algum **PROBLEMA NERVOSO OU PSIQUIÁTRICO**?  
(Excluir depressão)

**C.76**

|           |   |
|-----------|---|
| SIM ..... | 1 |
| NÃO ..... | 2 |
| NS .....  | 8 |
| NR .....  | 9 |

**C.78**

**C.20b**

O(A) sr(a) está fazendo tratamento para esse problema?

**C.77**

|           |   |
|-----------|---|
| SIM ..... | 1 |
| NÃO ..... | 2 |
| NS .....  | 8 |
| NR .....  | 9 |

**C.20b2**

Alguma vez um médico ou enfermeiro lhe disse que tem **DEPRESSÃO**?

**C.78**

|           |   |
|-----------|---|
| SIM ..... | 1 |
| NÃO ..... | 2 |
| NS .....  | 8 |
| NR .....  | 9 |

**C.81**

**C.20c**

Durante os últimos 12 meses, o(a) sr(a) tomou algum remédio para **DEPRESSÃO**?

**C.79**

|           |   |
|-----------|---|
| SIM ..... | 1 |
| NÃO ..... | 2 |
| NS .....  | 8 |
| NR .....  | 9 |

**C.20d**

Quanto sua **DEPRESSÃO** interfere em suas atividades do dia-a-dia?

**C.80**

|             |   |
|-------------|---|
| MUITO ..... | 1 |
| POUCO ..... | 2 |
| NADA .....  | 3 |
| NS .....    | 8 |
| NR .....    | 9 |

**SEÇÃO C - ESTADO DE SAÚDE - GDS**

**AGORA PENSE NAS ÚLTIMAS DUAS SEMANAS E DIGA COMO SE SENTIU NA MAIOR PARTE DO TEMPO NESSE PERÍODO...**

| <b>(APLICAR SOMENTE AO IDOSO)</b> |                                                                                                                                            | <b>SIM</b> | <b>NÃO</b> | <b>NS</b> | <b>NR</b> |
|-----------------------------------|--------------------------------------------------------------------------------------------------------------------------------------------|------------|------------|-----------|-----------|
| C.21a                             | <b>O(a) Sr.(a) está basicamente satisfeito com a sua vida?</b> <span style="float: right;"><b>C.81</b></span>                              | 1          | 2          | 8         | 9         |
| C.21b                             | <b>Tem diminuído ou abandonado muitos dos seus interesses ou atividades anteriores?</b> <span style="float: right;"><b>C.82</b></span>     | 1          | 2          | 8         | 9         |
| C.21c                             | <b>Sente que sua vida está vazia?</b> <span style="float: right;"><b>C.83</b></span>                                                       | 1          | 2          | 8         | 9         |
| C.21d                             | <b>Tem estado aborrecido freqüentemente?</b> <span style="float: right;"><b>C.84</b></span>                                                | 1          | 2          | 8         | 9         |
| C.21e                             | <b>Tem estado de bom humor a maior parte do tempo?</b> <span style="float: right;"><b>C.85</b></span>                                      | 1          | 2          | 8         | 9         |
| C.21f                             | <b>Tem estado preocupado ou tem medo de que alguma coisa ruim vá lhe acontecer?</b> <span style="float: right;"><b>C.86</b></span>         | 1          | 2          | 8         | 9         |
| C.21g                             | <b>Sente-se feliz a maior parte do tempo?</b> <span style="float: right;"><b>C.87</b></span>                                               | 1          | 2          | 8         | 9         |
| C.21h                             | <b>Com freqüência se sente desamparado ou desvalido?</b> <span style="float: right;"><b>C.88</b></span>                                    | 1          | 2          | 8         | 9         |
| C.21i                             | <b>Tem preferido ficar em casa em vez de sair e fazer coisas?</b> <span style="float: right;"><b>C.89</b></span>                           | 1          | 2          | 8         | 9         |
| C.21j                             | <b>Tem sentido que tem mais problemas com a memória do que outras pessoas de sua idade?</b> <span style="float: right;"><b>C.90</b></span> | 1          | 2          | 8         | 9         |
| C.21k                             | <b>O(a) sr(a) acredita que é maravilhoso estar vivo?</b> <span style="float: right;"><b>C.91</b></span>                                    | 1          | 2          | 8         | 9         |
| C.21l                             | <b>Sente-se inútil ou desvalorizado em sua situação atual?</b> <span style="float: right;"><b>C.92</b></span>                              | 1          | 2          | 8         | 9         |
| C.21m                             | <b>Sente-se cheio de energia?</b> <span style="float: right;"><b>C.93</b></span>                                                           | 1          | 2          | 8         | 9         |
| C.21n                             | <b>Se sente sem esperança diante da sua situação atual?</b> <span style="float: right;"><b>C.94</b></span>                                 | 1          | 2          | 8         | 9         |
| C.21o                             | <b>O(a) sr(a) acredita que as outras pessoas estão em situação melhor?</b> <span style="float: right;"><b>C.95</b></span>                  | 1          | 2          | 8         | 9         |

**C.21p**  
As perguntas C81 a C95 foram respondidas .....

**C.96**

PELOPRÓPRIOIDOSO ..... 1  
IDOSO+INFORMANTE AUXILIAR ..... 2  
INFORMANTE SUBSTITUTO ..... 3

**GOSTARIA AGORA DE LHE FAZER ALGUMAS PERGUNTAS RELACIONADAS À OCORRÊNCIA DE ALGUNS ACIDENTES, ESPECIALMENTE QUEDAS.**

**C.11\_1**  
**O(A) Sr(a) teve alguma queda depois que completou 60 anos?**

**C.97**

SIM ..... 1  
NÃO ..... 2  
NS ..... 8  
NR ..... 9

**C.99**

SEÇÃO C - ESTADO DE SAÚDE

C.11\_2

Quantas vezes caiu depois que completou 60 anos?

**C.98**

|                         |   |
|-------------------------|---|
| UMA VEZ.....            | 1 |
| DUAS VEZES.....         | 2 |
| TRÊS VEZES OU MAIS..... | 3 |
| NS .....                | 8 |
| NR .....                | 9 |

C.11

O(A) Sr(a) teve alguma queda nos últimos 12 meses (último ano)?

**C.99**

|           |   |                 |
|-----------|---|-----------------|
| SIM ..... | 1 | } <b>C. 109</b> |
| NÃO ..... | 2 |                 |
| NS .....  | 8 |                 |
| NR .....  | 9 |                 |
|           |   |                 |

C.11a

Quantas vezes caiu nos últimos 12 meses (último ano)?

**C.100**

|                         |   |
|-------------------------|---|
| UMA VEZ.....            | 1 |
| DUAS VEZES.....         | 2 |
| TRÊS VEZES OU MAIS..... | 3 |
| NS .....                | 8 |
| NR.....                 | 9 |

C.11a1

Quando foi sua última queda?

**C.101**

|                           |   |
|---------------------------|---|
| HÁ MENOS DE 15 DIAS ..... | 1 |
| 15 A 30 DIAS.....         | 2 |
| 30 A 90 DIAS .....        | 3 |
| HÁ MAIS DE 90 DIAS .....  | 4 |
| NS .....                  | 8 |
| NR.....                   | 9 |

C.11a2

Onde o(a) Sr(a) sofreu essa queda?

**C.102**

|                                    |    |
|------------------------------------|----|
| <b>EM CASA:</b> BANHEIRO .....     | 1  |
| QUARTO .....                       | 2  |
| COZINHA .....                      | 3  |
| SALA .....                         | 4  |
| QUINTAL .....                      | 5  |
| ESCADA .....                       | 6  |
| NA RUA .....                       | 7  |
| AOSUBIR/DESCERDOÔNIBUS/METRÔ ..... | 8  |
| NOINTERIORDOÔNIBUS/METRÔ .....     | 9  |
| OUTRO _____                        | 10 |
| <i>ESPECIFIQUE</i>                 |    |
| NS .....                           | 98 |
| NR.....                            | 99 |

C.11a3

Como foi essa última queda?

**C.103**

|                           |    |
|---------------------------|----|
| ESCORREGOU .....          | 1  |
| TROPEÇOU .....            | 2  |
| FICOU COM TONTURA .....   | 3  |
| DESMAIOU (SÍNCOPE) .....  | 4  |
| FRAQUEZA NAS PERNAS ..... | 5  |
| FOI EMPURRADO(A) .....    | 6  |
| NÃO LEMBRA .....          | 7  |
| OUTRO _____               | 8  |
| <i>ESPECIFIQUE</i>        |    |
| NS .....                  | 98 |
| NR.....                   | 99 |

# SEÇÃO C - ESTADO DE SAÚDE

C.11b

**Por causa dessa (as) queda (as) o(a) Sr(a) precisou de atendimento médico?**

**104**

SIM ..... 1  
NÃO ..... 2  
NS ..... 8  
NR ..... 9

C.11c

**Como consequência dessa(s) queda(s) o(a) Sr(a) fraturou o quadril/bacia ou fêmur?**

(últimos 12 meses)

**C.105**

SIM ..... 1  
NÃO ..... 2  
NS ..... 8  
NR ..... 9

C.11d

**Como consequência dessa(s) queda(s) o(a) Sr(a) fraturou o punho?**

**C.106**

SIM ..... 1  
NÃO ..... 2  
NS ..... 8  
NR ..... 9

C.11d1

**Como consequência dessa(s) queda(s) o(a) Sr.(a) teve alguma outra fratura?**

**C.107**

SIM ..... 1  
ONDE? \_\_\_\_\_  
*ESPECIFIQUE*  
NÃO ..... 2  
NS ..... 8  
NR ..... 9

C.11d3

**Depois de sua(s) queda(s) o(a) Sr(a)?**

**C.108**

FICOU COM MEDO DE CAIR NOVAMENTE ..... 1  
SAI MENOS DE CASA POR RECEIO DE CAIR ..... 2  
SÓ SAI DE CASA ACOMPANHADO(A) ..... 3  
OUTROS \_\_\_\_\_ 4  
*ESPECIFIQUE*  
NENHUMA DAS ANTERIORES ..... 5  
NS ..... 8  
NR ..... 9

C.11d2

**Desde que o(a) Sr(a) completou 60 anos teve alguma fratura além dessa relatada não relacionada à quedas?**

(utilize a redação mais adequada)

**C.109**

SIM ..... 1  
ONDE? \_\_\_\_\_  
*ESPECIFIQUE*  
NÃO ..... 2  
NS ..... 8  
NR ..... 9



SEÇÃO C - ESTADO DE SAÚDE

MUITAS PESSOAS PERDEM URINA DE VEZ EM QUANDO. ESTAMOS TENTANDO DESCOBRIR, ENTRE AS PESSOAS COM 60 ANOS E MAIS, QUANTAS TÊM ESSE TIPO DE PROBLEMA E O QUANTO ISSO AS ABORRECE. AGORA QUERO QUE O(A) SR(A) ME CONTE SE TEVE/TEM ALGUM PROBLEMA RELACIONADO COM O ATO DE URINAR, PENSANDO NAS ÚLTIMAS QUATRO SEMANAS (ÚLTIMO MÊS):

C.12

Nas últimas 4 semanas, o(a) Sr(a),  
ALGUMA VEZ, perdeu urina sem  
querer?

C.110

SIM ..... 1  
NÃO ..... 2  
NS ..... 8  
NR ..... 9

C.115

C.12c1

Com que frequência o(a) Sr(a) PERDE  
URINA?

ASSINALE APENAS UMA RESPOSTA

C.111

NUNCA ..... 1 (0 pontos)  
UMA VEZ POR SEMANA OU MENOS ..... 2 (1 ponto)  
DUAS OU TRÊS VEZES POR SEMANA ..... 3 (2 pontos)  
UMA VEZ AO DIA ..... 4 (3 pontos)  
DIVERSAS VEZES AO DIA ..... 5 (4 pontos)  
O TEMPO TODO ..... 6 (5 pontos)  
NS ..... 8  
NR ..... 9

C.12c2

Gostaríamos de saber a quantidade de  
urina que o(a) Sr(a) ACREDITA que PERDE.

ASSINALE APENAS  
UMA RESPOSTA

C.112

NENHUMA ..... 1 (0 pontos)  
PEQUENA QUANTIDADE ..... 2 (2 pontos)  
MODERADA QUANTIDADE ..... 3 (4 pontos)  
GRANDE QUANTIDADE ..... 4 (6 pontos)  
NS ..... 8  
NR ..... 9

C.12c3

Gostaríamos de saber o quanto o fato de  
perder urina interfere em sua vida  
cotidiana. Para isso gostaria que o(a)  
Sr(a) desse uma nota de 0(zero) a 10(dez)  
nessa interferência:

0 (zero) = não interfere em nada  
10 (dez) = interfere muito

C.113

CIRCULE A NOTA DADA:

0 1 2 3 4 5 6 7 8 9 10

NS ..... 98

NR ..... 99

C.12c18

Por causa de sua perda de urina o(a)  
Sr(a) necessita usar:

OBS.: Anotar até no máximo 3 alternativas  
(as mais importantes).

C.114

FRALDA ..... 1  
SONDA ..... 2  
ABSORVENTES, FORRO DE PROTEÇÃO (uso pessoal) .. 3  
FORRO DE PROTEÇÃO NA CAMA ..... 4  
NÃO USA NADA ..... 5  
NS ..... 8  
NR ..... 9

C.12c4

ICQI SCORE

Se o(a) idoso responde "NÃO" em  
C110 marque 00 (zero) em C115.

C.115

SOME OS RESULTADOS DE C.111 + C.112 + C.113

C.12c7

O(a) Sr(a) tem tido infecções urinárias?

C.116

SIM ..... 1  
NÃO ..... 2  
NS ..... 8  
NR ..... 9

**SEÇÃO C - ESTADO DE SAÚDE**

C.12c8

**O(a) Sr(a) levanta durante a noite para urinar?**

**C.117**

- SIM ..... 1
- NÃO ..... 2
- DORME COM ABSORVENTE OU FRALDA ..... 3
- URINA NA CAMA ..... 4
- NS ..... 8
- NR ..... 9

**AGORA QUERO QUE O(A) SR(A) ME CONTE SE TEVE/TEM ALGUM PROBLEMA RELACIONADO COMO O ATO DE EVACUAR:**

C.12b

**Nos últimos 12 meses, alguma vez perdeu controle dos movimentos intestinais ou das fezes?**

**C.118**

- SIM ..... 1
- NÃO ..... 2
- NS ..... 8
- NR ..... 9

**C.121**

C.12b1

**Com que frequência isso ocorre?**

**C.119**

- UMA VEZ POR SEMANA OU MENOS ..... 2
- DUAS OU TRÊS VEZES POR SEMANA ..... 1
- UMA VEZ AO DIA ..... 3
- O TEMPO TODO ..... 4
- NS ..... 8
- NR ..... 9

C.12b2

**Por causa do(s) problema(s) com seu intestino o(a) Sr(a) costuma usar:**

**OBS.:** Anotar até no máximo 3 alternativas (as mais importantes).

**C.120**

- FRALDA ..... 1
- FORRO DE PROTEÇÃO (uso pessoal)/ABSORVENTE ... 3
- FORRO DE PROTEÇÃO NA CAMA ..... 4
- NÃO USA NADA ..... 5
- NS ..... 8
- NR ..... 9

C.12b3

**Com que frequência, quando ficou com vontade de evacuar, o(a) Sr(a) teve dificuldade ou não conseguiu fazê-lo?**

**C.121**

- NUNCA ..... 1 →
- UMA VEZ A CADA 15 DIAS ..... 2
- DUAS OU TRÊS VEZES POR SEMANA ..... 3
- UMA VEZ POR SEMANA OU MENOS ..... 4
- DIARIAMENTE ..... 5
- NS ..... 8
- NR ..... 9

**C.123**

C.12b7

**Para ajudá-lo(a) a EVACUAR o(a) Sr(a):**

(Assinale todas as alternativas citadas).

**C.122**

- TOMA MEDICAMENTO/LAXANTE ..... 1
- FAZ DIETA ..... 2
- INGERE MAIOR QUANTIDADE DE ÁGUA/LÍQUIDOS 3
- OUTRO ..... 4
- NÃO FAZ NADA ..... 5
- NS ..... 8
- NR ..... 9

SEÇÃO C - ESTADO DE SAÚDE

**CÂNCER**

C.6

**Alguma vez um médico lhe disse que o(a) Sr(a) tem (teve) câncer (excluir tumores menores da pele)?**

**C.123**

|           |   |                |
|-----------|---|----------------|
| SIM ..... | 1 | } <b>C.129</b> |
| NÃO ..... | 2 |                |
| NS .....  | 8 |                |
| NR .....  | 9 |                |

C.6d

**Em que ano ou com que idade foi diagnosticado esse câncer?**

**OBS.:** Se teve mais de 1 coloque a **data do último**.

**C.124**

|             |         |           |
|-------------|---------|-----------|
| ANO .....   | _ _ _ _ | DO ÚLTIMO |
| IDADE ..... | _ _ _ _ | anos      |
| NS .....    | 9998    |           |
| NR .....    | 9999    |           |

C.6d1

**Onde era esse câncer?**

**OBS.:** Anotar até no máximo 3 alternativas (as mais importantes).

**C.125**

ÓRGÃO(S) OU PARTE(S) DO CORPO:

\_\_\_\_\_

\_\_\_\_\_

\_\_\_\_\_

\_\_\_\_\_

\_\_\_\_\_

NS..... 98

NR..... 99

C.6e

**O(a) Sr(a) recebeu algum tratamento para o câncer?**

OMAISSRECENTE

**C.126**

|           |   |                |
|-----------|---|----------------|
| SIM ..... | 1 | } <b>C.128</b> |
| NÃO ..... | 2 |                |
| NS .....  | 8 |                |
| NR .....  | 9 |                |

C.6f

**Que tipo de tratamento o(a) Sr(a) recebeu para seu câncer mais recente?**

ANOTE TODOS OS TIPOS MENCIONADOS ESPONTANEAMENTE

**C.127**

|                                                             |                    |
|-------------------------------------------------------------|--------------------|
| QUIMIOTERAPIA OU MEDICAÇÃO .....                            | 1                  |
| CIRURGIA OU BIÓPSIA .....                                   | 2                  |
| RADIAÇÃO/RAIOS X/RADIOTERAPIA .....                         | 3                  |
| MEDICAMENTOS PARA OS SINTOMAS (DOR, NÁUSEA, ALERGIAS) ..... | 4                  |
| OUTRO _____                                                 | 5                  |
|                                                             | <i>Especifique</i> |
| NS .....                                                    | 8                  |
| NR .....                                                    | 9                  |

C.6f1

**Esse câncer que o(a) Sr.(a) referiu foi único que teve?**

**C.128**

|          |   |
|----------|---|
| SIM..... | 1 |
| NÃO..... | 2 |
| NS ..... | 8 |
| NR ..... | 9 |

SEÇÃO C - ESTADO DE SAÚDE

**ANEMIA**

C.13a1

**Alguma vez algum médico ou enfermeira disse que o(a) Sr(a) tem ou teve ANEMIA?**

**C.129**

SIM ..... 1

QUANDO? \_\_\_\_\_ (ANO)

NÃO ..... 2

NS ..... 8

NR ..... 9

**C.131**

C.13a2

**O(a) Sr(a) faz ou fez tratamento para ANEMIA?**

**C.130**

SIM, DIETA ..... 1

SIM, MEDICAÇÃO ..... 2

SIM, DIETA E MEDICAÇÃO ..... 3

NÃO ..... 4

NÃO LEMBRA / NÃO SABE ..... 8

NR ..... 9

**DST**

C.13a3

**Alguma vez um médico ou enfermeira lhe disse que o(a) Sr(a) tem alguma doença sexualmente transmissível como sífilis, portador do vírus da AIDS, etc?**

**C.131**

SIM, É PORTADOR DO VÍRUS DA AIDS (HIV+) ..... 1

SIM, TEMAIDS ..... 2

DESDE QUANDO? \_\_\_\_\_ (ANO)

SIM, TEM OUTRA DOENÇA ..... 3

\_\_\_\_\_

*ESPECIFIQUE*

NÃO ..... 4

NS ..... 8

NR ..... 9

**C.133**

C.13a4

**O(a) Sr(a) fez/faz tratamento para esse problema?**

**C.132**

SIM ..... 1

NÃO ..... 2

NS ..... 8

NR ..... 9

**TRANSPLANTE**

C.13a5

**O(a) Sr(a) já fez algum transplante (substituição de um órgão do corpo por outro doado por outra pessoa)?**

**C.133**

SIM ..... 1

DE QUE? \_\_\_\_\_

QUANDO? \_\_\_\_\_ (ANO)

NÃO ..... 2

NS ..... 8

NR ..... 9

SEÇÃO C - ESTADO DE SAÚDE

AGORA QUERO QUE O(A) SR(A) ME CONTE SE, NOS ÚLTIMOS 12 MESES TEVE ALGUM DOS SEGUINTE PROBLEMAS:

| NOS ÚLTIMOS 12 MESES, O(A) SR(A) TEVE....                                                                                                                 | SIM | NÃO | NS | NR |
|-----------------------------------------------------------------------------------------------------------------------------------------------------------|-----|-----|----|----|
| C.13a<br>DOR NO PEITO? <span style="float: right;">C.134</span>                                                                                           | 1   | 2   | 8  | 9  |
| C.13b<br>INCHAÇO PERSISTENTE NOS PÉS OU TORNOZELOS? <span style="float: right;">C.135</span>                                                              | 1   | 2   | 8  | 9  |
| C.13c<br>FALTA DE AR QUANDO ESTÁ ACORDADO? <span style="float: right;">C.136</span>                                                                       | 1   | 2   | 8  | 9  |
| C.13d<br>VERTIGEM OU TONTURA PERSISTENTES? <span style="float: right;">C.137</span>                                                                       | 1   | 2   | 8  | 9  |
| C.13g<br>FADIGA OU CANSAÇO IMPORTANTE? <span style="float: right;">C.138</span>                                                                           | 1   | 2   | 8  | 9  |
| C.13l<br>TOSSE PERSISTENTE HÁ MAIS DE 3 SEMANAS?<br>OBS: (Encaminhar ao Posto de Saúde / comunicar a supervisão) <span style="float: right;">C.139</span> | 1   | 2   | 8  | 9  |
| C.13j<br>NÁUSEA PERSISTENTE E VÔMITO? <span style="float: right;">C.140</span>                                                                            | 1   | 2   | 8  | 9  |
| C.13m<br>FALTA DE APETITE (NÃO SENTE VONTADE DE COMER)? <span style="float: right;">C.141</span>                                                          | 1   | 2   | 8  | 9  |

C.13

O(a) Sr.(a) sente **ALGUM OUTRO DESCONFORTO OU MALESTAR** ou tem **ALGUMA OUTRA DOENÇA** que o(a) incomoda ou interfere no seu dia-a-dia e **QUE NÃO FOI CITADO** até agora?

C.142

SIM ..... 1

O QUE? .....

NÃO ..... 2

NS ..... 8

NR ..... 9

C.22h\_1

Nos últimos **3 MESES**, o(a) Sr(a) **PERDEU** peso sem fazer nenhuma dieta?

C.143

SIM, QUANTOS QUILOS? \_\_\_\_\_  
*Especifique*

Entre 1 e 3 kg ..... 1

Mais de 3 kg ..... 2

NÃO ..... 3

NS ..... 8

NR ..... 9

C.22h\_2

Nos últimos **12 MESES**, o(a) Sr(a) **PERDEU** peso sem fazer nenhuma dieta?

C.144

SIM, QUANTOS QUILOS? \_\_\_\_\_  
*Especifique*

ENTRE 1 E 3 KG ..... 1

MAIS DE 3 KG ..... 2

NÃO ..... 3

NS ..... 8

NR ..... 9

## SEÇÃO C - ESTADO DE SAÚDE

C.22h\_3

Nos últimos 12 meses, o(a) Sr(a) **SE SENTE** mais enfraquecido(a), acha que sua **FORÇA DIMINUIU?**

**C.145**

SIM ..... 1  
 NÃO ..... 2  
 NS ..... 8  
 NR ..... 9

C.22h\_4

Atualmente, o(a) Sr(a) faz **MENOS ATIVIDADES FÍSICAS** do que fazia há 12 meses atrás (há um ano).

**C.146**

SIM ..... 1  
 NÃO ..... 2  
 NS ..... 8  
 NR ..... 9

C.22h\_5

Atualmente, o(a) Sr(a) **ACREDITA QUE ESTÁ CAMINHANDO MAIS DEVAGAR** do que há 12 meses atrás (há um ano / demora mais tempo para fazer o mesmo percurso que fazia antes, como ir ao banco, à igreja, às compras, etc)?

**C.147**

SIM ..... 1  
 NÃO ..... 2  
 É ACAMADO ..... 3  
 É CADEIRANTE ..... 4  
 NS ..... 8  
 NR ..... 9

### NA ÚLTIMA SEMANA...

C.13g\_1

Com que frequência, **NA ÚLTIMA SEMANA**, o(a) Sr(a) sentiu que não **CONSEGUIRIA LEVAR ADIANTE SUAS COISAS** (iniciava alguma coisa mas não conseguia terminar):

**C.148**

NUNCA OU RARAMENTE (MENOS DE 1 DIA) ..... 1  
 POUCAS VEZES (1-2 DIAS) ..... 2  
 ALGUMAS VEZES (3-4 DIAS) ..... 3  
 A MAIOR PARTE DO TEMPO ..... 4  
 NS ..... 8  
 NR ..... 9

C.13g\_2

Com que frequência, **NA ÚLTIMA SEMANA**, a realização de suas atividades rotineiras exigiram do(a) Sr(a) um grande esforço para serem realizadas:

**C.149**

RARAMENTE (MENOS DE 1 DIA) OU NUNCA ..... 1  
 POUCAS VEZES (1-2 DIAS) ..... 2  
 ALGUMAS VEZES (3-4 DIAS) ..... 3  
 A MAIOR PARTE DO TEMPO ..... 4  
 NS ..... 8  
 NR ..... 9

SEÇÃO C - ESTADO DE SAÚDE

AGORA GOSTARIA DE SABER ALGUNS DETALHES SOBRE A SAÚDE DOS OLHOS, OUVIDOS E BOCA.

C.14a

O(a) Sr(a). usa óculos ou lentes de contato PARA ENXERGAR DE LONGE?

C.150

SIM ..... 1  
 NÃO ..... 2  
 NS ..... 8  
 NR ..... 9

C.14d

O(a) Sr(a). usa óculos PARA ENXERGAR DE PERTO?

C.151

SIM ..... 1  
 NÃO ..... 2  
 NS ..... 8  
 NR ..... 9

C.14b1

Em geral, como o(a) Sr(a) classificaria sua visão:

**OBS.:** se o(a) idoso usar óculos, peça que ele(a) classifique sua visão considerando o uso do mesmo.

C.152

MUITO BOA ..... 2  
 BOA ..... 3  
 REGULAR ..... 4  
 RUIM ..... 7  
 MUITO RUIM ..... 10  
 CEGO ..... 6  
 NS ..... 8  
 NR ..... 9

C.14

Em um ambiente iluminado, peça a(o) idosa(o) para ficar com ambos os olhos abertos e, a uma distância de 3 metros, mostre a prancha com o **OPTOTIPO (E)** nas **4 POSIÇÕES** e peça a ele(a) para identificar cada posição mostrada (conforme o desenho abaixo).

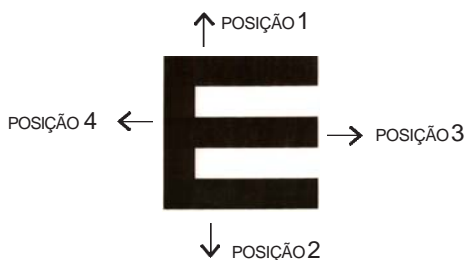

**OBS.:** se o(a) idoso usar óculos, peça que ele(a) faça o exercício usando o mesmo.

C.153

Assinale um “X” em cada posição que for identificada corretamente pelo(a) idoso(a).

|         |   |   |   |   |
|---------|---|---|---|---|
| POSIÇÃO | 1 | 2 | 3 | 4 |
|         |   |   |   |   |

Acertou 3 ou 4 vezes ..... 1  
 Acertou 1 ou 2 vezes ..... 2  
 Não acertou nenhuma vez ..... 3  
 Não fez o teste ..... 9

C.14f2

Alguma vez um médico ou enfermeira lhe disse que o(a) sr(a) tem/teve **CATARATA**?

C.154

SIM ..... 1  
 QUANDO? \_\_\_\_\_ (ANO)  
 NÃO ..... 2  
 NS ..... 8  
 NR ..... 9

Vá para C.156

SEÇÃO C - ESTADO DE SAÚDE

C.14f

O(a) Sr(a) já foi operado de **CATARATA**?

**C.155**

SIM ..... 1  
 OLHO DIREITO (QUANDO?) ..... (ANO)  
 OLHO ESQUERDO (QUANDO?) ..... (ANO)  
 NÃO ..... 2  
 NS ..... 8  
 NR ..... 9

C.14h

Alguma vez um médico ou enfermeira lhe disse que o(a) sr(a) tem **GLAUCOMA** (pressão aumentada no olho)?

**C.156**

SIM, MAS NÃO FAZ TRATAMENTO ..... 1  
 SIM FAZ TRATAMENTO ..... 2  
 NÃO ..... 3  
 NS ..... 8  
 NR ..... 9

C.14h2

Nos últimos 12 meses (último ano), o(a) Sr(a) diria que a sua **VISÃO MELHOROU, ESTÁ IGUAL** ou **PIOROU**?

**C.157**

MELHOROU ..... 1  
 IGUAL ..... 2  
 PIOROU ..... 3  
 NS ..... 8  
 NR ..... 9

C15a

Como o(a) Sr(a) CLASSIFICARIA A SUA **AUDIÇÃO**?

**OBS.:** se o(a) idoso costumar usar aparelho rotineiramente (todos os dias), peça que ele(a) classifique sua audição considerando o uso do mesmo.

**C.158**

EXCELENTE ..... 1  
 MUITO BOA ..... 2  
 BOA ..... 3  
 REGULAR ..... 4  
 MÁ ..... 5  
 SURDO(A) ..... 6  
 NS ..... 8  
 NR ..... 9

C.15\_1

O(a) Sr(a) usa aparelho auditivo (aparelho para surdez) rotineiramente?

**C.159**

SIM, ROTINEIRAMENTE ..... 1  
 SIM, DE VEZ EM QUANDO ..... 2  
 NÃO (TEM O APARELHO MAS NÃO USA) ..... 3  
 NÃO (NÃO TEM APARELHO / NÃO PRECISA) ..... 4  
 NS ..... 8  
 NR ..... 9



SEÇÃO C - ESTADO DE SAÚDE

C.18 **FILTRO**

**SEXO DO ENTREVISTADO**

**C.160**

MULHER ..... 1

HOMEM ..... 2 → **C.172**

**SÓ PARA AS MULHERES....**

C.18c2

A Sra. já fez **MAMOGRAFIA** (radiografia (RX) das mamas) alguma vez?

**C.161**

SIM ..... 1

NUNCAFEZ ..... 2 } **Vá para C.163**

NS ..... 8

NR ..... 9

C.18c3

Quando foi que a Sra. fez **MAMOGRAFIA** pela última vez?

**C.162**

NOS ÚLTIMOS 6 MESES ..... 1

6 MESES A 12 MESES ..... 2

12 MESES A 24 MESES ..... 3

HÁ MAIS DE 2 ANOS ..... 4

NS ..... 8

NR ..... 9

C.18d2

A Sra. já fez **TESTE DE PAPANICOLAU**, ou seja, o exame para verificar a existência de câncer no colo do útero?

**C.163**

SIM ..... 1

NUNCAFEZ ..... 2 } **Vá para C.165**

NS ..... 8

NR ..... 9

C.18d3

Quando foi que a Sra. fez esse exame (**PAPANICOLAU**) pela última vez?

**C.164**

NOS ÚLTIMOS 6 MESES ..... 1

6 MESES A 12 MESES ..... 2

12 MESES A 24 MESES ..... 3

HÁ MAIS DE 2 ANOS ..... 4

NS ..... 8

NR ..... 9

C.18d4

A Sra. retornou à **consulta médica** após a realização desses exames (**PAPANICOLAU** e ou **MAMOGRAFIA**)?

**C.165**

SIM ..... 1 → **Vá para C.167**

NÃO ..... 2

NS ..... 8 } **Vá para C.167**

NR ..... 9

C.18d5

Porque não retornou?

**C.166**

NÃO ACHOU IMPORTANTE/ESQUECEU ..... 1

NÃO CONSEGUIU AGENDAR ..... 2

OUTRO MOTIVO ..... 3

\_\_\_\_\_ *Especifique*

NS ..... 8

NR ..... 9

**SEÇÃO C - ESTADO DE SAÚDE**

C.18e

A senhora fez alguma cirurgia para tirar o útero e/ou os ovários?

**C.167**

SIM, ÚTERO E OVÁRIOS ..... 1  
 SIM, APENAS ÚTERO ..... 2  
 SIM, APENAS OVÁRIOS ..... 4  
 NÃO ..... 3  
 NS ..... 8  
 NR ..... 9

**C.169**

C.18f

Que idade tinha quando foi realizada essa cirurgia?

**C.168**

IDADE ..... | | | anos  
 NS ..... 98  
 NR ..... 99

C.18g

Que idade tinha quando menstruou pela última vez?

**C.169**

IDADE ..... | | | anos  
 AINDA MENSTRUA ..... 00  
 NS ..... 98  
 NR ..... 99

C.18h\_1

Alguma vez a senhora fez REPOSIÇÃO HORMONAL, ou seja, tomou HORMÔNIO de mulher por causa da menopausa?

**C.170**

SIM, TOMEI, MAS JÁ NÃO TOMO MAIS ..... 1  
 AINDA TOMO ..... 2  
 NUNCA TOMEI ..... 3  
 NS ..... 8  
 NR ..... 9

**Vá para C.178**

C.18k\_1

Por quanto tempo a senhora fez reposição hormonal?

**C.171**

NÚMERO DE MESES ..... | | |  
 NÚMERO DE anos ..... | | |  
 NS ..... 98  
 NR ..... 99

**C.178**

**SÓ PARA OS HOMENS....****C.172****QUADRO 4: QUESTIONÁRIO I-PSS (versão em português)**

| <b>C.31</b>                                                                                                                            | NENHUMA VEZ | MENOS DE 1 VEZ EM CADA 5 | MENOS QUE A METADE DAS VEZES | CERCA DE METADE DAS VEZES | MAIS QUE A METADE DAS VEZES | QUASE SEMPRE | NS | NR |
|----------------------------------------------------------------------------------------------------------------------------------------|-------------|--------------------------|------------------------------|---------------------------|-----------------------------|--------------|----|----|
| 1- No último mês, quantas vezes, em média, o Sr. teve a sensação de não esvaziar completamente a bexiga, depois de terminar de urinar? | 0           | 1                        | 2                            | 3                         | 4                           | 5            | 8  | 9  |
| 2- No último mês, quantas vezes, em média, o Sr. teve que urinar de novo menos de 2 horas depois de terminar de urinar?                | 0           | 1                        | 2                            | 3                         | 4                           | 5            | 8  | 9  |
| 3- No último mês, quantas vezes, em média, o Sr. notou que parava e recomeçava várias vezes quando urinava?                            | 0           | 1                        | 2                            | 3                         | 4                           | 5            | 8  | 9  |
| 4- No último mês, quantas vezes, em média, o Sr. notou que foi difícil conter a vontade de urinar?                                     | 0           | 1                        | 2                            | 3                         | 4                           | 5            | 8  | 9  |
| 5- No último mês, quantas vezes, em média, o Sr. notou que o jato urinário estava fraco?                                               | 0           | 1                        | 2                            | 3                         | 4                           | 5            | 8  | 9  |
| 6- No último mês, quantas vezes, em média, o Sr. teve que fazer força para começar a urinar?                                           | 0           | 1                        | 2                            | 3                         | 4                           | 5            | 8  | 9  |

|                                                                                                  | NENHUMA VEZ | 1 VEZ | 2 VEZES | 3 VEZES | 4 VEZES | 5 VEZES OU MAIS | NS | NR |
|--------------------------------------------------------------------------------------------------|-------------|-------|---------|---------|---------|-----------------|----|----|
| 7- No último mês, quantas vezes, em média, o Sr. teve que se levantar em cada noite para urinar? | 0           | 1     | 2       | 3       | 4       | 5               | 8  | 9  |

Escore I-PSS (Escore Internacional de Sintomas Prostáticos): 0 - 35

TOTAL =

|                                                                                                         | ÓTIMO | MUITO BEM | SATISFEITO | MAIS OU MENOS | INSATISFEITO | MAL | PÉSSIMO | NS | NR |
|---------------------------------------------------------------------------------------------------------|-------|-----------|------------|---------------|--------------|-----|---------|----|----|
| 8 - Se o sr. tivesse que passar o resto da vida urinando como está agora, como é que o sr. se sentiria? | 0     | 1         | 2          | 3             | 4            | 5   | 6       | 8  | 9  |

Escore QI (Qualidade de vida): 0 - 6

**SEÇÃO C - ESTADO DE SAÚDE**

C.19a

O Sr. já fez **EXAME DE PRÓSTATA**?

**C.173**

|                |   |                        |
|----------------|---|------------------------|
| SIM .....      | 1 | } <b>Vá para C.178</b> |
| NUNCAFEZ ..... | 2 |                        |
| NS .....       | 8 |                        |
| NR .....       | 9 |                        |

C.19b

Quando foi que o Sr. fez o **EXAME DE PRÓSTATA** pela última vez?

**C.174**

|                           |   |
|---------------------------|---|
| NOS ÚLTIMOS 6 MESES ..... | 1 |
| 6 MESES A 12 MESES .....  | 2 |
| 12 MESES A 24 MESES ..... | 3 |
| HÁ MAIS DE 2 ANOS .....   | 4 |
| NS .....                  | 8 |
| NR .....                  | 9 |

C.19c

O Sr. retornou à consulta médica após a realização do **EXAME DE PROSTÁTA**?

**C.175**

|           |   |                        |
|-----------|---|------------------------|
| SIM ..... | 1 | → <b>Vá para C.177</b> |
| NÃO ..... | 2 |                        |
| NS .....  | 8 | } <b>Vá para C.177</b> |
| NR .....  | 9 |                        |

C.19d

Porque a Sr. não retornou?

**C.176**

|                                     |   |
|-------------------------------------|---|
| NÃO ACHOU IMPORTANTE/ESQUECEU ..... | 1 |
| NÃO CONSEGUIU AGENDAR .....         | 2 |
| OUTRO MOTIVO .....                  | 3 |
| _____                               |   |
| <i>(Especifique)</i>                |   |
| NS .....                            | 8 |
| NR .....                            | 9 |

C.19g

O Sr. fez cirurgia para retirar a **PRÓSTATA**?

**C.177**

|           |   |
|-----------|---|
| SIM ..... | 1 |
| NÃO ..... | 2 |
| NS .....  | 8 |
| NR .....  | 9 |

**PARA TODOS (homens e mulheres)....**

C.19\_06  
 O(a) Sr(a) já tomou **VACINA CONTRA GRIPE?**

**C.178**

|           |   |               |
|-----------|---|---------------|
| SIM ..... | 1 | Vá para C.180 |
| NÃO ..... | 2 |               |
| NS .....  | 8 |               |
| NR .....  | 9 |               |

C.19\_7  
 Quando tomou a **VACINA CONTRA GRIPE** pela última vez?

**C.179**

|                            |   |
|----------------------------|---|
| NOS ÚLTIMOS 6 MESES .....  | 1 |
| NOS ÚLTIMOS 12 MESES ..... | 2 |
| HÁ MAIS DE 12 MESES .....  | 3 |
| NS/NÃO LEMBRA .....        | 8 |
| NR .....                   | 9 |

C.19\_8  
 O(a) Sr(a) tomou **VACINA CONTRA GRIPE SUÍNA (H1N1)?**

**C.180**

|           |   |
|-----------|---|
| SIM ..... | 1 |
| NÃO ..... | 2 |
| NS .....  | 8 |
| NR .....  | 9 |

C.19\_9  
 O(a) Sr.(a) **TEVE GRIPE** nos últimos 12 meses?

**C.181**

|                     |   |
|---------------------|---|
| SIM .....           | 1 |
| NÃO .....           | 2 |
| NS/NÃO LEMBRA ..... | 8 |
| NR .....            | 9 |

C.19\_10  
 O(a) Sr.(a) já tomou **VACINA CONTRA PNEUMONIA?**

**C.182**

|                     |   |
|---------------------|---|
| SIM .....           | 1 |
| NÃO .....           | 2 |
| NS/NÃO LEMBRA ..... | 8 |
| NR .....            | 9 |

C.19\_12  
 O(a) Sr.(a) já tomou **VACINA CONTRA TÉTANO?**

**C.183**

|                     |   |               |
|---------------------|---|---------------|
| Sim .....           | 1 | Vá para C.185 |
| Não .....           | 2 |               |
| NS/Não lembra ..... | 8 |               |
| NR .....            | 9 |               |

C.19\_13  
 Quando tomou a **vacina contra tétano** pela última vez?

**C.184**

|                            |   |
|----------------------------|---|
| Nos últimos 6 meses .....  | 1 |
| Nos últimos 12 meses ..... | 2 |
| Há mais de 12 meses .....  | 4 |
| NS/Não lembra .....        | 8 |
| NR .....                   | 9 |

SEÇÃO C - ESTADO DE SAÚDE  
**PARA TODOS (homens e mulheres)....**

**SÓ O(A) IDOSO(A)**

AGORA GOSTARIA DE LHE FAZER ALGUMAS PERGUNTAS SOBRE A SUA VIDA SEXUAL. A SEXUALIDADE É UMA PARTE NATURAL E IMPORTANTE DE TODAS AS ETAPAS DE NOSSA VIDA. GOSTARIA DE LEMBRÁ-LO(A) QUE TODAS AS SUAS RESPOSTAS SERÃO CONFIDENCIAIS E O SR. PODE SE RECUSAR A RESPONDER.

C.19\_1

Para o(a) Sr(a), quanto foi importante sua vida sexual?

(PENSE EM SUA VIDA INTEIRA)

**C.185**

- MUITO IMPORTANTE ..... 1
- IMPORTANTE ..... 2
- NADA IMPORTANTE ..... 3
- NÃO TEVE VIDA SEXUAL ATIVA ..... 4
- NS ..... 8
- NR ..... 9

C.19\_2

Pensando em como se sente agora, em geral, quanto tem sido importante para o(a) Sr(a) a sua vida sexual?

**C.186**

- MUITO IMPORTANTE ..... 1
- IMPORTANTE ..... 2
- NADA IMPORTANTE ..... 3
- NÃO TEM VIDA SEXUAL ATIVA ..... 4
- NS ..... 8
- NR ..... 9

C.19\_3

No último ano o(a) Sr(a) manteve algum tipo de atividade sexual?

**C.187**

- SIM ..... 1
- NÃO ..... 2
- NS ..... 8
- NR ..... 9

**C.190**

C.19\_4

Com que frequência ocorre essa atividade sexual citada?

**C.188**

- 2 OU 3 VEZES POR SEMANA ..... 1
- UMA VEZ POR SEMANA ..... 2
- 2 OU 3 VEZES POR MÊS ..... 3
- UMA VEZ AO MÊS OU MENOS ..... 4
- OUTRO ..... 5
- \_\_\_\_\_ (Especifique) ..... 8
- NS ..... 8
- NR ..... 9

C.19\_6

No último ano quantos parceiro(a)s diferentes o(a) Sr(a) teve?

**C.189**

|  |  |
|--|--|
|  |  |
|--|--|

C.19\_5

Quão satisfeito(a) o(a) Sr(a) diria que está com seu nível de atividade sexual?

**C.190**

- MUITO SATISFEITO(A) ..... 1
- SATISFEITO(A) ..... 2
- NADA SATISFEITO(A) ..... 3
- NS ..... 8
- NR ..... 9

**SEÇÃO C - ESTADO DE SAÚDE**

**AGORA VAMOS FALAR DA BOCA E DOS SEUS DENTES.**

C.16

Falta-lhe algum dente?

**C.191**

SIM ..... 1

NÃO ..... 2

NS ..... 8

NR ..... 9

C.16a

O Sr(a) consegue contar o número de dentes presentes em sua boca?

SÓ O(A) IDOSO(A) RESPONDE.

**C.192**

SIM ..... 1

QUANTOS NO ARCO SUPERIOR? \_\_\_\_\_

QUANTOS NO ARCO INFERIOR? \_\_\_\_\_

NÃO ..... 2

NS ..... 8

NR ..... 9

C.16\_1

Porque o(a) Sr(a) acha que perdeu os dentes?

SÓ O(A) IDOSO(A) RESPONDE.

**C.193**

\_\_\_\_\_

\_\_\_\_\_

\_\_\_\_\_

NS ..... 8

NR ..... 9

C.16b

Quando o(a) Sr(a) foi ao dentista pela última vez?

**C.194**

MENOS DE 1 ANO ..... 1

DE 1 A 2 ANOS ..... 2

3 ANOS OU MAIS ..... 3

NUNCA FOI AO DENTISTA ..... 4 } **C.197**

NS ..... 8

NR ..... 9

C.16c

Para que foi ao dentista pela última vez?

**C.195**

URGÊNCIA ..... 1

TRATAMENTO ..... 2

MANUTENÇÃO ..... 3

NS ..... 8

NR ..... 9

C.16c1

Sua última consulta odontológica foi:

**C.196**

GRATUITA, NO SERVIÇO PÚBLICO OU SUS ..... 1

GRATUITA, NO SERV. SOCIAL (SINDICATO, ONG, IGREJA) ..... 2

PAGA, PARTE, DIRETAMENTE NO SERVIÇO SOCIAL ..... 3

PAGA, INDIRETAMENTE P/PLANO SAÚDE (CONVÊNIO, COOPERATIVA, EMPRESA) ..... 4

PAGA, EM CONSULTÓRIO/CLÍNICA PRIVADA ..... 5

NS ..... 8

NR ..... 9

C.16d

O(a) Sr(a) diria que sua saúde bucal é muito boa, boa, regular, ruim ou muito ruim?

SÓ O(A) IDOSO(A) RESPONDE.

**C.197**

MUITO BOA ..... 2

BOA ..... 3

REGULAR ..... 4

RUIM ..... 6

MUITO RUIM ..... 7

NS ..... 8

NR ..... 9

## SEÇÃO C - ESTADO DE SAÚDE

**AGORA GOSTARIA QUE ME RESPONDESSE SE O QUE LHE PERGUNTO ACONTECEU SEMPRE, FREQUENTEMENTE, ALGUMAS VEZES, RARAMENTE OU NUNCA, NOS ÚLTIMOS 12 MESES.**

SEMPRE: a situação ocorre nos 7 dias da semana

FREQUENTEMENTE: a situação ocorre de 3 a 6 dias por semana

ALGUMAS VEZES: a situação ocorre de 1 a 2 vezes por semana

RARAMENTE: a situação ocorre menos de 1 vez por semana mas ocorre em algumas ocasiões

NUNCA: a situação não ocorre em nenhum momento

### GOHAI

| NOS ÚLTIMOS 12 MESES...                                                                                                                                       | Sempre | Frequen-<br>temente | Algumas<br>vezes | Raramente | Nunca | NS | NR |
|---------------------------------------------------------------------------------------------------------------------------------------------------------------|--------|---------------------|------------------|-----------|-------|----|----|
| C.17<br>Nos últimos 12 meses, com que frequência teve que comer menos ou mudar de comida por causa dos seus dentes, pontes ou dentadura postiça? <b>C.198</b> | 1      | 2                   | 3                | 4         | 5     | 8  | 9  |
| C.17a<br>Quantas vezes teve problemas para mastigar comidas duras como carne ou maçã? <b>C.199</b>                                                            | 1      | 2                   | 3                | 4         | 5     | 8  | 9  |
| C.17b<br>Quantas vezes conseguiu engolir bem? <b>C.200</b>                                                                                                    | 1      | 2                   | 3                | 4         | 5     | 8  | 9  |
| C.17c<br>Quantas vezes não conseguiu falar bem por causa dos seus dentes ou dentadura? <b>C.201</b>                                                           | 1      | 2                   | 3                | 4         | 5     | 8  | 9  |
| C.17d<br>Quantas vezes não conseguiu comer as coisas que queria por ter algum problema com seus dentes ou com sua dentadura? <b>C.202</b>                     | 1      | 2                   | 3                | 4         | 5     | 8  | 9  |
| C.17e<br>Quantas vezes não quis sair à rua ou falar com outras pessoas por causa de seus dentes ou da sua dentadura? <b>C.203</b>                             | 1      | 2                   | 3                | 4         | 5     | 8  | 9  |
| C.17f<br>Quando se olha no espelho, quantas vezes esteve contente com seus dentes ou dentadura? <b>C.204</b>                                                  | 1      | 2                   | 3                | 4         | 5     | 8  | 9  |
| C.17g<br>Quantas vezes teve que usar algum remédio para aliviar a dor de seus dentes ou os problemas na sua boca? <b>C.205</b>                                | 1      | 2                   | 3                | 4         | 5     | 8  | 9  |
| C.17h<br>Quantas vezes esteve preocupado ou se deu conta de que seus dentes ou sua dentadura não estão bem? <b>C.206</b>                                      | 1      | 2                   | 3                | 4         | 5     | 8  | 9  |
| C.17i<br>Quantas vezes ficou nervoso por problemas de dentes ou da dentadura? <b>C.207</b>                                                                    | 1      | 2                   | 3                | 4         | 5     | 8  | 9  |
| C.17j<br>Quantas vezes não comeu como queria diante de outras pessoas por causa dos seus dentes ou da dentadura? <b>C.208</b>                                 | 1      | 2                   | 3                | 4         | 5     | 8  | 9  |
| C.17k<br>Quantas vezes teve dor nos dentes ou gengivas por causa de alimentos frios, quentes ou doces? <b>C.209</b>                                           | 1      | 2                   | 3                | 4         | 5     | 8  | 9  |



SEÇÃO C - ESTADO DE SAÚDE

OS ESTUDOS FEITOS MOSTRAM QUE A NUTRIÇÃO E O ESTILO DE VIDA SÃO FATORES MUITO IMPORTANTES PARA A SAÚDE. POR ISSO GOSTARIA DE FAZER ALGUMAS PERGUNTAS SOBRE A SUA ALIMENTAÇÃO.

C.22i

Com relação a seu estado nutricional o(a) Sr(a) se considera bem nutrido?

C. 210

SIM ..... 1  
NÃO ..... 2  
NS ..... 8  
NR ..... 9

C.22a

Quantas refeições o(a) Sr(a) faz por dia?

CONSIDERAR O CAFÉ DA MANHÃ  
COMO UMA REFEIÇÃO

C. 211

UMA ..... 1  
DUAS ..... 2  
TRÊS OU MAIS ..... 3  
NS ..... 8  
NR ..... 9

C.22f

Tem comido menos por problemas digestivos ou falta de apetite ou dificuldade de mastigação ou de engolir nos últimos 3 meses?

C. 212

SIM, MUITO ..... 1  
SIM, MAIS OU MENOS ..... 3  
NÃO ..... 2  
NS ..... 8  
NR ..... 9

C.22g

Quantos copos ou xícaras de líquido consome diariamente? (incluir água, café, chá, leite, suco etc.)

C. 213

MENOS DE 3 COPOS ..... 1  
DE 3 A 5 COPOS ..... 2  
MAIS DE 5 COPOS ..... 3  
NS ..... 8  
NR ..... 9

## SEÇÃO C - ESTADO DE SAÚDE

**PENSANDO NO ÚLTIMO MÊS**, GOSTARIA DE SABER COMO É A SUA ALIMENTAÇÃO.  
ENTÃO FAREI PERGUNTAS SOBRE OS ALIMENTOS QUE O(A) SR(A) COSTUMA COMER E BEBER:

| O(A) SR(A) COSTUMA COMER OS SEGUINTE ALIMENTOS?<br>QUANTAS VEZES?                                                                                                                                                                                                   | NÃO COMEU/<br>COME DE VEZ<br>EM QUANDO. | COME UMA<br>VEZ/DIA. | COME 2 A 3<br>VEZES/DIA. | COME PELO<br>MENOS 1<br>VEZ/SEMANA | COME 2 A 3<br>VEZES/<br>SEMANA | COME DE 4 A<br>6 VEZES/<br>SEMANA | NS | NR |
|---------------------------------------------------------------------------------------------------------------------------------------------------------------------------------------------------------------------------------------------------------------------|-----------------------------------------|----------------------|--------------------------|------------------------------------|--------------------------------|-----------------------------------|----|----|
| <b>C. 22_1 Frutas</b> (banana, laranja, maçã, mamão, melancia, uva, etc). <span style="border: 1px solid black; padding: 2px;">C.214</span>                                                                                                                         | 1                                       | 2                    | 3                        | 4                                  | 5                              | 6                                 | 8  | 9  |
| <b>C. 22_2 Legumes</b> (abobrinha, cenoura, chuchu, pepino, tomate) e <b>verduras</b> (alface, agrião, couve, repolho, rúcula, etc). <span style="border: 1px solid black; padding: 2px;">C.215</span>                                                              | 1                                       | 2                    | 3                        | 4                                  | 5                              | 6                                 | 8  | 9  |
| <b>C. 22_3 Leite</b> ou iogurte desnatado, queijos branco ( <i>light</i> ). <span style="border: 1px solid black; padding: 2px;">C.216</span>                                                                                                                       | 1                                       | 2                    | 3                        | 4                                  | 5                              | 6                                 | 8  | 9  |
| <b>C. 22_4 Leite</b> ou iogurte integral, queijos tipo mussarela, prato, etc. <span style="border: 1px solid black; padding: 2px;">C.217</span>                                                                                                                     | 1                                       | 2                    | 3                        | 4                                  | 5                              | 6                                 | 8  | 9  |
| <b>C. 22_5 Carnes</b> (de vaca, frango, peixe ou porco, etc). <span style="border: 1px solid black; padding: 2px;">C.218</span>                                                                                                                                     | 1                                       | 2                    | 3                        | 4                                  | 5                              | 6                                 | 8  | 9  |
| <b>C. 22_6 Ovos.</b> <span style="border: 1px solid black; padding: 2px;">C.219</span>                                                                                                                                                                              | 1                                       | 2                    | 3                        | 4                                  | 5                              | 6                                 | 8  | 9  |
| <b>C. 22_7 Feijão</b> , lentilha, grão de bico, ervilha seca/partida, soja. <span style="border: 1px solid black; padding: 2px;">C.220</span>                                                                                                                       | 1                                       | 2                    | 3                        | 4                                  | 5                              | 6                                 | 8  | 9  |
| <b>C. 22_8 Embutidos</b> (salsicha, salame, linguiça, mortadela, presunto, peito de peru, <i>blanquet</i> , etc). <span style="border: 1px solid black; padding: 2px;">C.221</span>                                                                                 | 1                                       | 2                    | 3                        | 4                                  | 5                              | 6                                 | 8  | 9  |
| <b>C. 22_9 Massas e pães</b> (pão, arroz, macarrão, bolo, aveia, biscoito sem recheio, fubá, farinha de milho/mandioca). <span style="border: 1px solid black; padding: 2px;">C.222</span>                                                                          | 1                                       | 2                    | 3                        | 4                                  | 5                              | 6                                 | 8  | 9  |
| <b>C. 22_10 Cereais integrais</b> (pão, arroz, bolo, macarrão, biscoito). <span style="border: 1px solid black; padding: 2px;">C.223</span>                                                                                                                         | 1                                       | 2                    | 3                        | 4                                  | 5                              | 6                                 | 8  | 9  |
| <b>C. 22_11 Tubérculos</b> (batata, inhame, cará, mandioca, mandioquinha, batata doce). <span style="border: 1px solid black; padding: 2px;">C.224</span>                                                                                                           | 1                                       | 2                    | 3                        | 4                                  | 5                              | 6                                 | 8  | 9  |
| <b>C. 22_12 Doces</b> (bala, bombom, pirulito, chocolate, bolacha recheada, geléia, pudim, mousse, sorvete, doce de leite, de abóbora, cocada, caldo de cana, refrigerantes não dietéticos, etc). <span style="border: 1px solid black; padding: 2px;">C.225</span> | 1                                       | 2                    | 3                        | 4                                  | 5                              | 6                                 | 8  | 9  |
| <b>C. 22_13 Alimentos <i>light</i>, <i>diet</i> ou <i>zero</i></b> (refrigerante, suco, gelatina, bala/chocolate). <span style="border: 1px solid black; padding: 2px;">C.226</span>                                                                                | 1                                       | 2                    | 3                        | 4                                  | 5                              | 6                                 | 8  | 9  |
| <b>C. 22_14 Gordura vegetal</b> (óleo de soja, milho, girassol, canola, azeite de oliva, margarina, maionese). <span style="border: 1px solid black; padding: 2px;">C.227</span>                                                                                    | 1                                       | 2                    | 3                        | 4                                  | 5                              | 6                                 | 8  | 9  |
| <b>C. 22_15 Gordura animal</b> (manteiga, nata ou creme de leite, banha de porco, toucinho). <span style="border: 1px solid black; padding: 2px;">C.228</span>                                                                                                      | 1                                       | 2                    | 3                        | 4                                  | 5                              | 6                                 | 8  | 9  |
| <b>C. 22_16 Frituras</b> (pastel, batatinha frita, coxinha, quibe, rissóle). <span style="border: 1px solid black; padding: 2px;">C.229</span>                                                                                                                      | 1                                       | 2                    | 3                        | 4                                  | 5                              | 6                                 | 8  | 9  |
| <b>C. 22_17 Alimentos enlatados</b> (ervilha, milho, azeitona, massa ou molho de tomate). <span style="border: 1px solid black; padding: 2px;">C.230</span>                                                                                                         | 1                                       | 2                    | 3                        | 4                                  | 5                              | 6                                 | 8  | 9  |
| <b>C. 22_18 Tempero ou molho industrializado</b> (para saladas, caldos em tablete ou em pó); sopa industrializada, macarrão instantâneo e salgadinhos de pacote. <span style="border: 1px solid black; padding: 2px;">C.231</span>                                  | 1                                       | 2                    | 3                        | 4                                  | 5                              | 6                                 | 8  | 9  |

## SEÇÃO C - ESTADO DE SAÚDE

C.23

Nos últimos três meses, em média, quantos dias por semana tomou bebidas alcoólicas? (Por exemplo: cerveja, vinho, aguardente ou outras bebidas que contenham álcool).

**C.232**

|                                 |   |                |
|---------------------------------|---|----------------|
| NENHUM .....                    | 1 | → <b>C.244</b> |
| MENOS DE 1 DIA POR SEMANA ..... | 2 |                |
| 1 DIA POR SEMANA .....          | 3 |                |
| 2-3 DIAS POR SEMANA .....       | 4 |                |
| 4-6 DIAS POR SEMANA .....       | 5 |                |
| TODOS OS DIAS .....             | 6 |                |
| NS .....                        | 8 |                |
| NR .....                        | 9 |                |

C.23a

Nos últimos três meses, nos dias em que tomou bebida alcoólica, **QUANTOS COPOS** de vinho, cervejas, aguardente ou outra bebida tomou, em média, por dia?

**C.233**

|                      |     |
|----------------------|-----|
| COPOS DE VINHO ..... | _ _ |
| CERVEJAS .....       | _ _ |
| OUTRA BEBIDA .....   | _ _ |
| NS .....             | 98  |
| NR .....             | 99  |

### S-MAST-G

#### VERSÃO GERIÁTRICA DO TESTE MICHIGAN REDUZIDO DE TRIAGEM PARA ALCOOLISMO

|       |                                                                                                                             | SIM | NÃO |
|-------|-----------------------------------------------------------------------------------------------------------------------------|-----|-----|
| C.23b | Quando fala com outras pessoas, o(a) sr(a). sempre subestima quanto bebe? <b>C.234</b>                                      | 1   | 2   |
| C.23c | Depois de algumas doses, o(a) sr(a). às vezes não come ou é capaz de pular uma refeição porque não sente fome? <b>C.235</b> | 1   | 2   |
| C.23d | Tomar algumas doses ajuda a diminuir os seus tremores? <b>C.236</b>                                                         | 1   | 2   |
| C.23e | O álcool às vezes dificulta a lembrança de partes do dia ou da noite? <b>C.237</b>                                          | 1   | 2   |
| C.23f | O(a) sr(a). usualmente toma uma bebida para relaxar ou acalmar os nervos? <b>C.238</b>                                      | 1   | 2   |
| C.23g | O(a) sr(a). bebe para esquecer os seus problemas? <b>C.239</b>                                                              | 1   | 2   |
| C.23h | O(a) sr(a). alguma vez aumentou a bebida depois de ter uma perda na sua vida? <b>C.240</b>                                  | 1   | 2   |
| C.23i | Alguma vez um médico ou enfermeira falou que estava preocupado com o seu hábito de beber? <b>C.241</b>                      | 1   | 2   |
| C.23j | Alguma vez o(a) sr(a). fez regras para administrar o seu hábito de beber? <b>C.242</b>                                      | 1   | 2   |
| C.23k | Quando o(a) sr(a). se sente só, tomar uma bebida melhora? <b>C.243</b>                                                      | 1   | 2   |

**SOME AS RESPOSTAS "SIM" DANDO UM PONTO PARA CADA UMA (0-10)** \_\_\_\_\_

**SEÇÃO C - ESTADO DE SAÚDE**

C.24

Quanto ao hábito de fumar, o(a) Sr(a)...

LEIA CADA OPÇÃO ATÉ OBTER  
UMA RESPOSTA AFIRMATIVA.

**C.244**

FUMA ATUALMENTE ..... 1

JÁ FUMOU, MAS NÃO FUMA MAIS ..... 2 → **C.246**

NUNCA FUMOU ..... 3

NS ..... 8

NR ..... 9

**C.248**

C.24a

Quantos cigarros, charutos ou cachimbos fuma por dia?

DEFINIÇÃO: UM MAÇO = 20 CIGARROS

**C.245**

CIGARROS POR DIA ..... | | | |

CACHIMBO (*nº de vezes que enche o cachimbo*) | | | |

CHARUTOS ..... | | | |

**Vá para C.247**

C.24b

Há quantos anos deixou de fumar?

SE DEIXOU DE FUMAR HÁ MENOS  
DE UM ANO, ANOTE "00"

**C.246**

HÁ QUANTOS ANOS: ..... | | | |

IDADE EM ANOS: ..... | | | |

ANO ..... | | | |

NS ..... **9998**

NR ..... **9999**

C.24c

Que idade tinha quando começou a fumar?

**C.247**

IDADE EM ANOS: ..... | | | |

ANO ..... | | | |

NS ..... **9998**

NR ..... **9999**

## SEÇÃO C - ESTADO DE SAÚDE

Nós estamos interessados em saber como são as suas atividades físicas no dia-a-dia. Suas respostas nos ajudarão a entender quão ativas as pessoas idosas são. As perguntas a seguir dizem respeito ao tempo que o(a) Sr(a) gastou fazendo atividade(s) física(s) na **ÚLTIMA SEMANA**. Essas perguntas incluem as atividades que o(a) Sr(a) fez no seu trabalho, para ir de um lugar a outro, no lazer, por esporte, por exercício ou como parte das suas atividades em casa ou no jardim. Suas respostas são muito importantes. Por favor responda cada questão mesmo que não se considere ativo(a).

**Para responder as questões lembre que:**

**ATIVIDADES FÍSICAS VIGOROSAS** são aquelas que precisam de um grande esforço físico e que fazem **RESPIRAR MUITO MAIS FORTE** que o normal

**ATIVIDADES FÍSICAS MODERADAS** são aquelas que precisam de algum esforço físico e que fazem respirar **UM POUCO MAIS FORTE** que o normal.

C.25c

Quantos dias da última semana o(a) Sr(a) CAMINHOU por **pele menos 10 minutos contínuos** em casa ou no trabalho, como forma de transporte para ir de um lugar para outro, por lazer, por prazer ou como forma de exercício?

**C.248**

NÚMERO DE DIAS NA SEMANA: ..... |\_\_| dias

NENHUM DIA ..... 0 → **C.250**

NS ..... 8

NR ..... 9

C.25d

Nesses dias em que o(a) Sr(a) caminhou **por pelo menos 10 minutos contínuos** quanto tempo, **NO TOTAL**, o(a) Sr(a) gastou caminhando por dia?

**C.249**

NÚMERO DE HORAS: ..... |\_\_| horas

NÚMERO DE MINUTOS ..... |\_\_| minutos

NS ..... 8

NR ..... 9

C.25e

Na última semana, QUANTOS DIAS o(a) Sr(a) realizou **ATIVIDADES FÍSICAS MODERADAS** por pelo menos **10 MINUTOS CONTÍNUOS**, ou seja, atividades que exigiram algum **ESFORÇO FÍSICO** e o(a) fizeram respirar **UM POUCO MAIS FORTE** que o normal ou aumentaram um pouco os batimentos de seu coração?

**(EXCLUIR A CAMINHADA)**

**EX:** PEDALAR BICICLETA, NADAR, DANÇAR, GINÁSTICA AERÓBICA LEVE, JOGAR VOLEI RECREATIVO, CARREGAR PESOS LEVES, FAZER SERVIÇOS DOMÉSTICOS COMO VARRER, ASPIRAR, CUIDAR DO JARDIM)

**C.250**

NÚMERO DE DIAS NA SEMANA: ..... |\_\_| DIAS

NENHUM DIA ..... 0 → **C.252**

NS ..... 8

NR ..... 9

**RELACIONE A(S) ATIVIDADE(S) CITADA(S):** **CÓDIGO** **METS**

1) ..... [ ][ ][ ][ ] [ ][ ]

2) ..... [ ][ ][ ][ ] [ ][ ]

3) ..... [ ][ ][ ][ ] [ ][ ]

4) ..... [ ][ ][ ][ ] [ ][ ]

5) ..... [ ][ ][ ][ ] [ ][ ]

6) ..... [ ][ ][ ][ ] [ ][ ]

7) ..... [ ][ ][ ][ ] [ ][ ]

8) ..... [ ][ ][ ][ ] [ ][ ]

C.25f

Nesses dias em que o(a) Sr(a) fez essas **ATIVIDADES MODERADAS POR PELO MENOS 10 MINUTOS CONTÍNUOS** quanto tempo, **NO TOTAL**, o(a) Sr(a) gastou com essas atividades por dia?

**C.251**

NÚMERO DE HORAS: ..... |\_\_| horas

NÚMERO DE MINUTOS ..... |\_\_| minutos

NS ..... 8

NR ..... 9

## SEÇÃO C - ESTADO DE SAÚDE

C.25g

Na última semana, quantos dias o(a) Sr(a) realizou **ATIVIDADES FÍSICAS VIGOROSAS** por pelo menos **10 MINUTOS CONTÍNUOS**, ou seja, atividades que exigiram um grande esforço que aumentaram **MUITO OS BATIMENTOS DO SEU CORAÇÃO** e o fizeram **RESPIRAR MUITO MAIS FORTE?**

(EXCLUIR A CAMINHADA)

EX.: CORRER, GINÁSTICA, AERÓBICA, FAZER ESTEIRA, JOGAR FUTUBOL, BASQUETE, CARREGAR GRANDES PESOS, ETC.

**C.252**

NÚMERO DE DIAS NA SEMANA: .. |\_\_\_| DIAS

NENHUM DIA ..... 0 →

NS ..... 8

NR ..... 9

Vá para  
C.254

RELACIONE A(S) ATIVIDADE(S) CITADA(S):

|          | CÓDIGO | METS |
|----------|--------|------|
| 1) _____ | _ _ _  | _    |
| 2) _____ | _ _ _  | _    |
| 3) _____ | _ _ _  | _    |
| 4) _____ | _ _ _  | _    |
| 5) _____ | _ _ _  | _    |

C.25h

Nesses dias em que o(a) Sr(a) fez essas **ATIVIDADES VIGOROSAS** por pelo menos **10 MINUTOS CONTÍNUOS** quanto tempo, **NO TOTAL**, o(a) Sr(a) gastou com essas atividades por dia?

**C.253**

NÚMERO DE HORAS: ..... |\_|\_| horas

NÚMERO DE MINUTOS ..... |\_|\_| minutos

NS ..... 8

NR ..... 9

AS PRÓXIMAS QUESTÕES SÃO SOBRE O TEMPO QUE O(A) SR(A) **PERMANECE SENTADO DURANTE O DIA**, NO TRABALHO, EM CASA, DURANTE SEU TEMPO LIVRE. ISSO INCLUI O TEMPO SENTADO LENDO, DESCANSANDO, VISITANDO UM(A) AMIGO(A), ASSISTINDO TELEVISÃO (SENTADO OU DEITADO), USANDO UM COMPUTADOR. **(NÃO INCLUIR O TEMPO SENTADO EM TRANSPORTE DE ÔNIBUS, TREM, METRÔ OU CARRO)**

C.25i

Quanto tempo, no total, o(a) Sr(a) gasta, **SENTADO(A), POR DIA DURANTE A SEMANA?**

**C. 254**

NÚMERO DE HORAS: ..... |\_|\_| horas

NÚMERO DE MINUTOS ..... |\_|\_| minutos

NS ..... 8

NR ..... 9

C.25j

Quanto tempo, no total, o(a) Sr(a) gasta, **SENTADO(A), durante UM DIA DE FINAL DE SEMANA (SÁBADO OU DOMINGO)?**

**C.255**

NÚMERO DE HORAS: ..... |\_|\_| horas

NÚMERO DE MINUTOS ..... |\_|\_| minutos

NS ..... 8

NR ..... 9

C.25b

Nos **ÚLTIMOS 12 MESES**, realizou regularmente, para se distrair, algum trabalho manual, artesanato ou atividade artística, pelo menos uma vez por semana?

**C.256**

SIM ..... 1

NÃO ..... 2

NS ..... 8

NR ..... 9

C.25k

AS PERGUNTAS DA **SEÇÃO C** FORAM RESPONDIDAS:

**C.257**

PELO PRÓPRIO IDOSO ..... 1

IDOSO + INFORMANTE AUXILIAR ..... 2

INFORMANTE SUBSTITUTO ..... 3

SEÇÃO C - ESTADO DE SAÚDE

**AS SEGUINTE PERGUNTAS SÃO RELATIVAS AOS SEUS HÁBITOS DE SONO DURANTE O ÚLTIMO MÊS:**

C.26

No último mês o(a) Sr(a). teve dificuldade com seu sono?

**C.258**

SIM ..... 1  
 NÃO ..... 2 →  
 NS ..... 8  
 NR ..... 9

Vá para C.260

C.26a

Qual a dificuldade mais frequente:

**C.259**

DEMORA PARA DORMIR ..... 1  
 ACORDA DE MADRUGADA E NÃO DORME MAIS .... 2  
 ACORDA VÁRIAS VEZES DURANTE A NOITE ..... 3  
 NÃO CONSEGUE DORMIR ..... 4  
 OUTROS ..... 5  
 (Especifique)  
 NS ..... 8  
 NR ..... 9

C.26b

Durante o último mês, com que frequência o(a) Sr(a) tomou medicamento para ajudá-lo(a) a dormir?

**C.260**

NENHUMA VEZ ..... 1  
 MENOS DE 1 VEZ NA SEMANA ..... 2  
 1 A 2 VEZES NA SEMANA ..... 3  
 OUTROS ..... 4  
 (Especifique)  
 TODOS OS DIAS ..... 5

C.26c

No último mês, com que frequência o(a) Sr(a) teve dificuldade de ficar acordado durante o dia?

**C.261**

NENHUMA VEZ ..... 1  
 MENOS DE 1 VEZ NA SEMANA ..... 2  
 1 A 2 VEZES NA SEMANA ..... 3  
 OUTROS ..... 4  
 (Especifique)  
 TODOS OS DIAS ..... 5

C.26d

Durante o último mês, de maneira geral, como o(a) Sr(a) classificaria a qualidade do seu sono?

**C.262**

MUITO BOM ..... 1  
 BOM ..... 2  
 REGULAR ..... 3  
 RUIM ..... 4  
 MUITO RUIM ..... 5  
 NS ..... 8  
 NR ..... 9

C.26e

As perguntas **C26 a C26d** foram respondidas:

**C.263**

PELOPRÓPRIO IDOSO ..... 1  
 IDOSO + INFORMANTE AUXILIAR ..... 2  
 INFORMANTE SUBSTITUTO ..... 3

## SEÇÃO C - ESTADO DE SAÚDE

GOSTARIA DE FAZER ALGUMAS PERGUNTAS SOBRE OS PRIMEIROS 15 ANOS DE SUA VIDA.

C.31

Como o(a) Sr(a) descreveria a situação econômica de sua família durante a maior parte dos primeiros 15 anos de sua vida?

LEIA CADA OPÇÃO ATÉ OBTIVER UMA RESPOSTA AFIRMATIVA.

**C.264**

BOA ..... 1  
 REGULAR ..... 2  
 RUIM ..... 3  
 NS ..... 8  
 NR ..... 9

C.32

Durante a maior parte dos primeiros 15 anos de sua vida, o(a) Sr(a) descreveria sua saúde naquela época como excelente, boa ou ruim?

**C.265**

EXCELENTE ..... 1  
 BOA ..... 2  
 RUIM ..... 3  
 NS ..... 8  
 NR ..... 9

| Antes dos 15 anos o(a) Sr(a) se lembra de ter tido alguma destas doenças? |                                                                       | SIM | NÃO | NS | NR |
|---------------------------------------------------------------------------|-----------------------------------------------------------------------|-----|-----|----|----|
| C.28a                                                                     | <b>Nefrite</b>                                                        | 1   | 2   | 8  | 9  |
| C.28b                                                                     | <b>Hepatite</b>                                                       | 1   | 2   | 8  | 9  |
| C.28c                                                                     | <b>Sarampo</b>                                                        | 1   | 2   | 8  | 9  |
| C.28d                                                                     | <b>Tuberculose</b>                                                    | 1   | 2   | 8  | 9  |
| C.28e                                                                     | <b>Febre reumática</b>                                                | 1   | 2   | 8  | 9  |
| C.28f                                                                     | <b>Asma</b>                                                           | 1   | 2   | 8  | 9  |
| C.28g                                                                     | <b>Bronquite crônica</b>                                              | 1   | 2   | 8  | 9  |
| C.28h                                                                     | <b>Alguma outra?</b><br><i>Especifique</i><br>_____<br>_____<br>_____ | 1   | 2   | 8  | 9  |
|                                                                           |                                                                       | 1   | 2   | 8  | 9  |
|                                                                           |                                                                       | 1   | 2   | 8  | 9  |

C.29

Durante os primeiros 15 anos da sua vida ficou na cama por um mês ou mais devido a algum problema de saúde?

**C.274**

SIM ..... 1  
 NÃO ..... 2  
 NS ..... 8  
 NR ..... 9

C.30

Durante os primeiros 15 anos da sua vida o(a) Sr(a). diria que houve algum tempo em que não comeu o suficiente ou passou fome?

**C.275**

SIM ..... 1  
 NÃO ..... 2  
 NS ..... 8  
 NR ..... 9



## SEÇÃO D – ESTADO FUNCIONAL

D  
A pessoa idosa:

**D1**

Anda ..... 1 Vá para **D3**  
 Está acamada ..... 2  
 Usa cadeira de rodas ..... 3  
 NS ..... 8  
 NR ..... 9

D. 0  
Pelo fato de estar acamado(a) ou utilizar cadeira de rodas, o(a) idoso(a) desenvolveu algum tipo de ferida na pele? Se sim, marque com um **X** o local da ferida na figura ao lado.

**D2**

Sim ..... 1

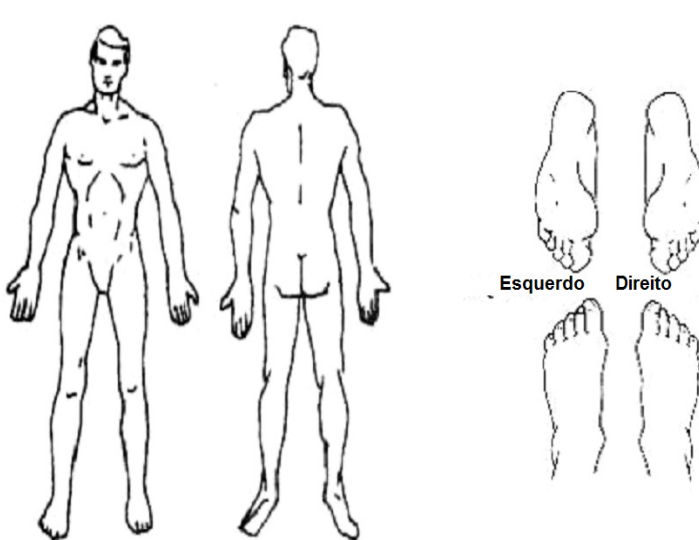

Esquerdo Direito

Não ..... 2  
 NS ..... 8  
 NR ..... 9

|      |                                                                                                                   | SIM | NÃO | NÃO PODE | PODE MAS NÃO FAZ | NS | NR |   |
|------|-------------------------------------------------------------------------------------------------------------------|-----|-----|----------|------------------|----|----|---|
| D.1a | Tem dificuldade para correr ou trotar um quilometro e meio ou 15 quadras?                                         | D3  | 1   | 2        | 3                | 4  | 8  | 9 |
| D.1b | Tem dificuldade em caminhar várias ruas (quadras)?                                                                | D4  | 1   | 2        | 3                | 4  | 8  | 9 |
| D.1c | Tem dificuldade em caminhar <u>uma</u> rua (quadra)?                                                              | D5  | 1   | 2        | 3                | 4  | 8  | 9 |
| D.2  | Tem dificuldade em ficar sentado (a) durante duas horas?                                                          | D6  | 1   | 2        | 3                | 4  | 8  | 9 |
| D.3  | Tem dificuldade em se levantar de uma cadeira depois de ficar sentado(a) durante longos períodos?                 | D7  | 1   | 2        | 3                | 4  | 8  | 9 |
| D.4  | Tem dificuldade em subir <u>vários</u> lances de escada <u>sem parar</u> ou descansar?                            | D8  | 1   | 2        | 3                | 4  | 8  | 9 |
| D.5  | Tem dificuldade em subir <u>um</u> andar pelas escadas <u>sem parar</u> ou descansar?                             | D9  | 1   | 2        | 3                | 4  | 8  | 9 |
| D.6  | Tem dificuldade em se curvar, ajoelhar ou agachar?                                                                | D10 | 1   | 2        | 3                | 4  | 8  | 9 |
| D.7  | Tem dificuldade para estender os braços acima dos ombros?                                                         | D11 | 1   | 2        | 3                | 4  | 8  | 9 |
| D.8  | Tem dificuldade para puxar ou empurrar grandes objetos como, por exemplo, uma poltrona?                           | D12 | 1   | 2        | 3                | 4  | 8  | 9 |
| D.9  | Tem dificuldade para levantar ou carregar pesos maiores que 5 kg como, por exemplo, uma sacola de compras pesada? | D13 | 1   | 2        | 3                | 4  | 8  | 9 |
| D.10 | Tem dificuldade para levantar uma moeda de uma mesa                                                               | D14 | 1   | 2        | 3                | 4  | 8  | 9 |

**SEÇÃO D – ESTADO FUNCIONAL**

D11a  
**MEDIDA DE INDEPENDENCIA  
 FUNCIONAL**  
 Preenchido pela crítica

|\_\_| |\_\_| (total)

**AGORA VOU FAZER ALGUMAS PERGUNTAS SOBRE AS ATIVIDADES QUE FAZEMOS NO DIA-A-DIA.  
 POR FAVOR, DIGA-ME SE O(A) SR(A) TEM ALGUMA DIFICULDADE PARA EXECUTAR SOZINHO(A)  
 CADA UMA DAS ATIVIDADES QUE EU CITAR DEVIDO A UM PROBLEMA DE SAÚDE.**

D.11  
 O(A) Sr(a) tem dificuldade em  
**ATRAVESSAR UM QUARTO  
 CAMINHANDO?**  
**D15**

Sim ..... 1  
 Não ..... 2  
 NS ..... 8  
 NR ..... 9

D.11\_1  
 O(A) Sr(a) precisa de ajuda para  
**ATRAVESSAR UM QUARTO  
 CAMINHANDO?**  
 Precisa de supervisão?  
 ( ) Sim ( ) Não  
**D16**

Sim ..... 1  
 Não ..... 2  
 NS ..... 8  
 NR ..... 9

D.12a  
 O(A) Sr(a) costuma utilizar algum  
**APARELHO OU INSTRUMENTO DE APOIO**  
 para poder atravessar um quarto  
 caminhando?  
**D17**

Sim ..... 1  
 Não ..... 2  
 NS ..... 8  
 NR ..... 9 } **Vá para D21**

D.12b  
 Que tipo de aparelho ou meio de apoio  
 o(a) Sr(a) utiliza?  
  
**ASSINALAR ATÉ 4 ALTERNATIVAS.**  
**D18**

Corrimão ..... **01**  
 Andador ..... **02**  
 Bengala ..... **03**  
 Muletas ..... **04**  
 Sapatos ortopédicos ..... **05**  
 Suporte ou reforço (pernas ou  
 ombro) ..... **06**  
 Prótese ..... **07**  
 Oxigênio ou respirador ..... **08**  
 Móveis ou parede como apoio ..... **09**  
 Cadeira de rodas ..... **10**  
 Outro ..... **11**  
 (especifique)  
 NS ..... **98**  
 NR ..... **99**

**SEÇÃO D – ESTADO FUNCIONAL**

D.12c  
 O(A) Sr(a) recebe ajuda de alguém para **ATRAVESSAR UM QUARTO CAMINHANDO?**  
 Se SIM:  
 O(A) idoso(a) faz mais de 50% da atividade?  
 ( ) Sim ( ) Não

Quem faz mais esforço?  
 ( ) idoso(a) ( ) cuidador

**D19**

|           |   |                      |
|-----------|---|----------------------|
| Sim ..... | 1 | } Vá para <b>D21</b> |
| Não ..... | 2 |                      |
| NS .....  | 8 |                      |
| NR .....  | 9 |                      |

D.12d  
 Quem o(a) ajuda a **ATRAVESSAR UM QUARTO CAMINHANDO?**

NOME: \_\_\_\_\_

Se for referida mais que uma pessoa, anote o nome daquela que ajuda o(a) idoso(a) com mais frequência.

**D20**

|                                           |           |
|-------------------------------------------|-----------|
| Cônjuge / Companheiro.....                | <b>01</b> |
| Filho(a) / Enteadado(a) .....             | <b>02</b> |
| Pais / Sogros .....                       | <b>03</b> |
| Irmão (ãos) .....                         | <b>04</b> |
| Genro / Nora .....                        | <b>05</b> |
| Neto(s) .....                             | <b>06</b> |
| Outro familiar .....                      | <b>07</b> |
| Outro NÃO Familiar (não remunerado) ..... | <b>08</b> |
| Cuidador (remunerado) .....               | <b>09</b> |
| Empregada .....                           | <b>10</b> |
| NS .....                                  | <b>98</b> |
| NR .....                                  | <b>99</b> |

D.13  
 O(A) Sr(a) tem dificuldade para se **VESTIR SOZINHO(A)?**

**D21**

|                                                                                   |          |
|-----------------------------------------------------------------------------------|----------|
| Sim, parte de cima do corpo (acima da cintura) .....                              | <b>1</b> |
| Sim, parte de baixo do corpo (abaixo da cintura, incluindo meias e sapatos) ..... | <b>2</b> |
| Ambas .....                                                                       | <b>4</b> |
| Não .....                                                                         | <b>3</b> |
| NS .....                                                                          | <b>8</b> |
| NR .....                                                                          | <b>9</b> |

D.13\_2  
 O(A) Sr(a) precisa de ajuda para se **VESTIR?**

Precisa de supervisão ou de alguém que separe sua roupa?

( ) Sim ( ) Não

**D22**

|           |   |                      |
|-----------|---|----------------------|
| Sim ..... | 1 | } Vá para <b>D25</b> |
| Não ..... | 2 |                      |
| NS .....  | 8 |                      |
| NR .....  | 9 |                      |

D.13\_1  
 O(A) Sr(a) recebe ajuda de alguém para **se VESTIR?**

Se SIM:  
 O(A) idoso(a) faz mais de 50% da atividade?  
 ( ) Sim ( ) Não

Quem faz mais esforço?  
 ( ) idoso(a) ( ) cuidador

**D23**

|           |   |                      |
|-----------|---|----------------------|
| Sim ..... | 1 | } Vá para <b>D25</b> |
| Não ..... | 2 |                      |
| NS .....  | 8 |                      |
| NR .....  | 9 |                      |

**SEÇÃO D – ESTADO FUNCIONAL**

D.13c

Quem o(a) ajuda a **se VESTIR?**

NOME: \_\_\_\_\_

Se for referida mais que uma pessoa, anote o nome daquela que ajuda o(a) idoso(a) com mais frequência.

**D24**

|                                           |           |
|-------------------------------------------|-----------|
| Cônjuge / Companheiro.....                | <b>01</b> |
| Filho(a) / Enteado(a) .....               | <b>02</b> |
| Pais / Sogros .....                       | <b>03</b> |
| Irmão (ãos) .....                         | <b>04</b> |
| Genro / Nora .....                        | <b>05</b> |
| Neto(s) .....                             | <b>06</b> |
| Outro familiar .....                      | <b>07</b> |
| Outro NÃO Familiar (não remunerado) ..... | <b>08</b> |
| Cuidador (remunerado) .....               | <b>09</b> |
| Empregada .....                           | <b>10</b> |
| NS .....                                  | <b>98</b> |
| NR .....                                  | <b>99</b> |

D.14a

O(A) Sr(a) tem dificuldade para **TOMAR BANHO SOZINHO?**

**D25**

|           |          |
|-----------|----------|
| Sim ..... | <b>1</b> |
| Não ..... | <b>2</b> |
| NS .....  | <b>8</b> |
| NR .....  | <b>9</b> |

D.14c2

O(A) Sr(a) precisa da ajuda de alguém para **TOMAR BANHO?**

Precisa de supervisão?  
 Sim  Não

**D26**

|           |          |                      |
|-----------|----------|----------------------|
| Sim ..... | <b>1</b> | } <b>Vá para D29</b> |
| Não ..... | <b>2</b> |                      |
| NS .....  | <b>8</b> |                      |
| NR .....  | <b>9</b> |                      |

D.14cd1

O(A) Sr(a) recebe ajuda de alguém para **ENTRAR OU SAIR DO CHUVEIRO / BANHEIRA?**

Se SIM:  
 O(A) idoso(a) faz mais de 50% da atividade?  
 Sim  Não

Quem faz mais esforço?  
 idoso(a)  cuidador

**D27**

|           |          |                      |
|-----------|----------|----------------------|
| Sim ..... | <b>1</b> | } <b>Vá para D29</b> |
| Não ..... | <b>2</b> |                      |
| NS .....  | <b>8</b> |                      |
| NR .....  | <b>9</b> |                      |

**SEÇÃO D – ESTADO FUNCIONAL**

D.14d

Quem o(a) ajuda a **TOMAR BANHO/ENTRAR E SAIR DO CHUVEIRO?**

NOME:

Se for referida mais que uma pessoa, anote o nome daquela que ajuda o(a) idoso(a) com mais frequência.

**D28**

|                                           |           |
|-------------------------------------------|-----------|
| Cônjuge / Companheiro.....                | <b>01</b> |
| Filho(a) / Enteadado(a) .....             | <b>02</b> |
| Pais / Sogros .....                       | <b>03</b> |
| Irmão (ãos) .....                         | <b>04</b> |
| Genro / Nora .....                        | <b>05</b> |
| Neto(s) .....                             | <b>06</b> |
| Outro familiar .....                      | <b>07</b> |
| Outro NÃO Familiar (não remunerado) ..... | <b>08</b> |
| Cuidador (remunerado) .....               | <b>09</b> |
| Empregada .....                           | <b>10</b> |
| NS .....                                  | <b>98</b> |
| NR .....                                  | <b>99</b> |

D.14b

O(A) Sr(a) costuma utilizar algum **EQUIPAMENTO OU APARELHO** para poder TOMAR BANHO (como corrimão, barra de apoio, etc) ou toma banho **SENTADO(A)** (Cadeira, banquinho, vaso sanitário, etc)?

**D29**

|           |          |
|-----------|----------|
| Sim ..... | <b>1</b> |
| Não ..... | <b>2</b> |
| NS .....  | <b>8</b> |
| NR .....  | <b>9</b> |

D.14a\_1a

O(A) Sr(a) tem dificuldade para **FAZER SOZINHO SUA HIGIENE PESSOAL** sozinho, o que inclui:

- Lavar e secar as mãos
- Lavar e secar o rosto
- Escovar os dentes
- Pentear o cabelo
- Barbear-se (homens) ou Maquiar-se (mulheres)

**D30**

|                                                         | Sim      | Utiliza adaptação | Não      | NS       | NR       |
|---------------------------------------------------------|----------|-------------------|----------|----------|----------|
| D14a_1a<br>Lavar e secar as mãos                        | <b>1</b> | <b>2</b>          | <b>3</b> | <b>8</b> | <b>9</b> |
| D14a_1b<br>Lavar e secar o rosto                        | <b>1</b> | <b>2</b>          | <b>3</b> | <b>8</b> | <b>9</b> |
| D14a_1c<br>Escovar os dentes                            | <b>1</b> | <b>2</b>          | <b>3</b> | <b>8</b> | <b>9</b> |
| D14a_1d<br>Pentear o cabelo                             | <b>1</b> | <b>2</b>          | <b>3</b> | <b>8</b> | <b>9</b> |
| D14a_1e<br>Barbear-se (homens) ou Maquiar-se (mulheres) | <b>1</b> | <b>2</b>          | <b>3</b> | <b>8</b> | <b>9</b> |

**SEÇÃO D – ESTADO FUNCIONAL**

D14c02

O(A) Sr(a) precisa da ajuda de alguém para  
**FAZER SUA HIGIENE PESSOAL?**

Precisa de supervisão em qualquer um dos itens ou em todos ou precisa que alguém separe ou prepare o material a ser utilizado?

( ) Sim ( ) Não

**D31**

|           |   |                      |
|-----------|---|----------------------|
| Sim ..... | 1 | } Vá para <b>D34</b> |
| Não ..... | 2 |                      |
| NS .....  | 8 |                      |
| NR .....  | 9 |                      |

D.14c\_1

O(A) Sr(a) recebe ajuda de alguém para  
**FAZER SOZINHO SUA HIGIENE PESSOAL** que inclui:

- Lavar e secar as mãos
- Lavar e secar o rosto
- Escovar os dentes
- Pentear o cabelo
- Barbear-se (homens) ou Maquiar-se (mulheres)

Se SIM:

O(A) idoso(a) faz mais de 50% da atividade?

( ) Sim ( ) Não

Quem faz mais esforço?

( ) idoso(a) ( ) cuidador

**D32**

|           |   |                      |
|-----------|---|----------------------|
| Sim ..... | 1 | } Vá para <b>D34</b> |
| Não ..... | 2 |                      |
| NS .....  | 8 |                      |
| NR .....  | 9 |                      |

D.14d\_1

Quem o ajuda a **FAZER SUA HIGIENE PESSOAL?**

NOME:

\_\_\_\_\_

Se for referida mais que uma pessoa, anote o nome daquela que ajuda o(a) idoso(a) com mais frequência.

**D33**

|                                           |    |
|-------------------------------------------|----|
| Cônjuge / Companheiro.....                | 01 |
| Filho(a) / Enteado(a) .....               | 02 |
| Pais / Sogros .....                       | 03 |
| Irmão (ãos) .....                         | 04 |
| Genro / Nora .....                        | 05 |
| Neto(s) .....                             | 06 |
| Outro familiar .....                      | 07 |
| Outro NÃO Familiar (não remunerado) ..... | 08 |
| Cuidador (remunerado) .....               | 09 |
| Empregada .....                           | 10 |
| NS .....                                  | 98 |
| NR .....                                  | 99 |

**SEÇÃO D – ESTADO FUNCIONAL**

D.15a  
 O(A) Sr(a) tem dificuldade para **COMER SOZINHO** a partir de um prato colocado à sua frente?

**D34**

- Sim ..... 1
- Não ..... 2
- NS ..... 8
- NR ..... 9

D15a1  
 O(A) Sr(a) precisa da ajuda de alguém para **COMER** a partir de um prato colocado à sua frente?

Precisa de supervisão ou de alguém que corte a comida, encha o copo, etc?  
 ( ) Sim ( ) Não

**D35**

- Sim ..... 1
  - Não ..... 2
  - NS ..... 8
  - NR ..... 9
- } Vá para **D38**

D.15b  
 O(A) Sr(a) recebe ajuda de alguém para **COMER?**

Se SIM:  
 O(A) idoso(a) faz mais de 50% da atividade?  
 ( ) Sim ( ) Não

Quem faz mais esforço?  
 ( ) idoso(a) ( ) cuidador

**D36**

- Sim ..... 1
  - Não ..... 2
  - NS ..... 8
  - NR ..... 9
- } Vá para **D38**

D.15c  
 Quem o(a) ajuda a **COMER?**

NOME:  
 \_\_\_\_\_

Se for referida mais que uma pessoa, anote o nome daquela que ajuda o(a) idoso(a) com mais frequência.

**D37**

- Cônjuge / Companheiro..... 01
- Filho(a) / Enteado(a) ..... 02
- Pais / Sogros ..... 03
- Irmão (ãos) ..... 04
- Genro / Nora ..... 05
- Neto(s) ..... 06
- Outro familiar ..... 07
- Outro NÃO Familiar (não remunerado) ..... 08
- Cuidador (remunerado) ..... 09
- Empregada ..... 10
- NS ..... 98
- NR ..... 99

D.16b  
 Para **DEITAR E/OU LEVANTAR DA CAMA; SENTAR E/OU LEVANTAR DA CADEIRA/CADEIRA DE RODAS**, O(A) Sr(a) costuma utilizar algum **APOIO** (bengala, andador, móveis próximos, parede, etc)?

**D38**

- Sim ..... 1
- Não ..... 2
- Não se aplica (é acamado) ..... 3
- NS ..... 8
- NR ..... 9

**SEÇÃO D – ESTADO FUNCIONAL**

D.16a

O(A) Sr(a) tem dificuldade para **DEITAR E/OU LEVANTAR DA CAMA; SENTAR E/OU LEVANTAR DA CADEIRA/CADEIRA DE RODAS SOZINHO(A)?**

**D39**

Sim ..... **1**  
 Não ..... **2**  
 Não se aplica  
 (é acamado) ..... **3**  
 NS ..... **8**  
 NR ..... **9**

D.16a1

O(A) Sr(a) precisa da ajuda de alguém para **DEITAR E/OU LEVANTAR DA CAMA; SENTAR E/OU LEVANTAR DA CADEIRA/CADEIRA DE RODAS?**

Precisa de supervisão ?  
 ( ) Sim ( ) Não

**D40**

Sim ..... **1**  
 Não ..... **2**  
 NS ..... **8**  
 NR ..... **9** } Vá para **D43**

D.16c

O(A) Sr(a) recebe ajuda de alguém para **DEITAR E/OU LEVANTAR DA CAMA; SENTAR E/OU LEVANTAR DA CADEIRA/CADEIRA DE RODAS?**

**PARA OS ACAMADOS CONSIDERAR A AJUDA PARA MOVÊ-LO(A) NA CAMA**

Se SIM:

O(A) idoso(a) faz mais de 50% da atividade?  
 ( ) Sim ( ) Não

Quem faz mais esforço?  
 ( ) idoso(a) ( ) cuidador

**D41**

Sim ..... **1**  
 Não ..... **2**  
 NS ..... **8**  
 NR ..... **9** } Vá para **D43**

D.16D

Quem o(a) ajuda a **DEITAR E/OU LEVANTAR DA CAMA; SENTAR E/OU LEVANTAR DA CADEIRA/CADEIRA DE RODAS?**

NOME:

\_\_\_\_\_

Se for referida mais que uma pessoa, anote o nome daquela que ajuda o(a) idoso(a) com mais frequência.

**D42**

Cônjuge / Companheiro..... **01**  
 Filho(a) / Enteado(a) ..... **02**  
 Pais / Sogros ..... **03**  
 Irmão (ãos) ..... **04**  
 Genro / Nora ..... **05**  
 Neto(s) ..... **06**  
 Outro familiar ..... **07**  
 Outro NÃO Familiar (não remunerado) ..... **08**  
 Cuidador (remunerado) ..... **09**  
 Empregada ..... **10**  
 NS ..... **98**  
 NR ..... **99**



SEÇÃO D – ESTADO FUNCIONAL

D.17b

Para **IR AO BANHEIRO** inclui: (Ir ao banheiro, despir-se, sentar nio vaso sanitário, limpar-se, levantar do vaso sanitário, vestir-se lavar as mãos), o(a) Sr(a) costuma utilizar algum **APOIO** (bengala, andador, móveis próximos, parede, etc)?

**D43**

- Sim ..... 1
- Não ..... 2
- Não se aplica (é acamado ou cadeirante)..... 3
- NS ..... 8
- NR ..... 9

D.17a

O(A) Sr(a) tem dificuldade para **IR AO BANHEIRO SOZINHO(A)** (incluindo sentar e levantar do vaso sanitário)?

**D44**

- Sim ..... 1
- Não ..... 2
- Não se aplica (é acamado ou cadeirante) ..... 3
- NS ..... 8
- NR ..... 9

D.17a1

O(A) Sr(a) precisa de ajuda para **IR AO BANHEIRO?**

Precisa de supervisão ?  
( ) Sim ( ) Não

**D45**

- Sim ..... 1
  - Não ..... 2
  - NS ..... 8
  - NR ..... 9
- } Vá para **D48**

D.17c

O(A) Sr(a) recebe ajuda de alguém para **IR AO BANHEIRO (incluindo sentar e levantar do vaso sanitário)?**

**PARA OS ACAMADOS E CADEIRANTES CONSIDERAR A AJUDA PARA TROCÁ-LOS (FRALDA, ROUPA DE CAMA, ROUPAS, ETC)**

Se SIM:

O(A) idoso(a) faz mais de 50% da atividade?  
( ) Sim ( ) Não

Quem faz mais esforço?  
( ) idoso(a) ( ) cuidador

**D46**

- Sim ..... 1
  - Não ..... 2
  - NS ..... 8
  - NR ..... 9
- } Vá para **D48**

**SEÇÃO D – ESTADO FUNCIONAL**

D.17d

Quem o(a) ajuda a **IR AO BANHEIRO (incluindo sentar e levantar do vaso sanitário)?**

**PARA OS ACAMADOS E CADEIRANTES CONSIDERAR A AJUDA PARA TROCÁ-LOS (FRALDA, ROUPA DE CAMA, ROUPAS, ETC)**

NOME:

\_\_\_\_\_

Se for referida mais que uma pessoa, anote o nome daquela que ajuda o(a) idoso(a) com mais frequência.

**D47**

|                                           |           |
|-------------------------------------------|-----------|
| Cônjuge / Companheiro.....                | <b>01</b> |
| Filho(a) / Enteadado(a) .....             | <b>02</b> |
| Pais / Sogros .....                       | <b>03</b> |
| Irmão (ãos) .....                         | <b>04</b> |
| Genro / Nora .....                        | <b>05</b> |
| Neto(s) .....                             | <b>06</b> |
| Outro familiar .....                      | <b>07</b> |
| Outro NÃO Familiar (não remunerado) ..... | <b>08</b> |
| Cuidador (remunerado) .....               | <b>09</b> |
| Empregada .....                           | <b>10</b> |
| NS .....                                  | <b>98</b> |
| NR .....                                  | <b>99</b> |

D.18a

O(A) Sr(a) tem dificuldade para **PREPARAR UMA REFEIÇÃO QUENTE?**

**D48**

|                         |          |
|-------------------------|----------|
| Sim .....               | <b>1</b> |
| Não costuma fazer ..... | <b>2</b> |
| Não .....               | <b>3</b> |
| NS .....                | <b>8</b> |
| NR .....                | <b>9</b> |

D.18a1

O(A) Sr(a) precisa de ajuda para **PREPARAR UMA REFEIÇÃO QUENTE?**

**D49**

|           |          |                      |
|-----------|----------|----------------------|
| Sim ..... | <b>1</b> | } Vá para <b>D52</b> |
| Não ..... | <b>2</b> |                      |
| NS .....  | <b>8</b> |                      |
| NR .....  | <b>9</b> |                      |

D.18b

O(A) Sr(a) recebe ajuda de alguém para **PREPARAR UMA REFEIÇÃO QUENTE?**

**D50**

|           |          |                      |
|-----------|----------|----------------------|
| Sim ..... | <b>1</b> | } Vá para <b>D52</b> |
| Não ..... | <b>2</b> |                      |
| NS .....  | <b>8</b> |                      |
| NR .....  | <b>9</b> |                      |

**SEÇÃO D – ESTADO FUNCIONAL**

D.18c

Quem o(a) ajuda a **PREPARAR UMA REFEIÇÃO QUENTE?**

NOME:

\_\_\_\_\_

Se for referida mais que uma pessoa, anote o nome daquela que ajuda o(a) idoso(a) com mais frequência.

**D51**

|                                           |           |
|-------------------------------------------|-----------|
| Cônjuge / Companheiro.....                | <b>01</b> |
| Filho(a) / Enteado(a) .....               | <b>02</b> |
| Pais / Sogros .....                       | <b>03</b> |
| Irmão (ãos) .....                         | <b>04</b> |
| Genro / Nora .....                        | <b>05</b> |
| Neto(s) .....                             | <b>06</b> |
| Outro familiar .....                      | <b>07</b> |
| Outro NÃO Familiar (não remunerado) ..... | <b>08</b> |
| Cuidador (remunerado) .....               | <b>09</b> |
| Empregada .....                           | <b>10</b> |
| NS .....                                  | <b>98</b> |
| NR .....                                  | <b>99</b> |

D.19a

O(A) Sr(a) tem dificuldade para **CUIDAR DE SEU PRÓPRIO DINHEIRO?**

**D52**

|                         |          |
|-------------------------|----------|
| Sim .....               | <b>1</b> |
| Não costuma fazer ..... | <b>2</b> |
| Não .....               | <b>3</b> |
| NS .....                | <b>8</b> |
| NR .....                | <b>9</b> |

D.19a1

O(A) Sr(a) precisa de ajuda para **CUIDAR DE SEU DINHEIRO?**

**D53**

|           |          |                      |
|-----------|----------|----------------------|
| Sim ..... | <b>1</b> | } Vá para <b>D56</b> |
| Não ..... | <b>2</b> |                      |
| NS .....  | <b>8</b> |                      |
| NR .....  | <b>9</b> |                      |

D.19b

O(A) Sr(a) recebe ajuda de alguém para **CUIDAR DE SEU DINHEIRO?**

**D54**

|           |          |                      |
|-----------|----------|----------------------|
| Sim ..... | <b>1</b> | } Vá para <b>D56</b> |
| Não ..... | <b>2</b> |                      |
| NS .....  | <b>8</b> |                      |
| NR .....  | <b>9</b> |                      |

**SEÇÃO D – ESTADO FUNCIONAL**

D.19c

Quem o(a) ajuda a **CUIDAR DE SEU DINHEIRO?**

NOME:

Se for referida mais que uma pessoa, anote o nome daquela que ajuda o(a) idoso(a) com mais frequência.

**D55**

|                                           |           |
|-------------------------------------------|-----------|
| Cônjuge / Companheiro.....                | <b>01</b> |
| Filho(a) / Enteado(a) .....               | <b>02</b> |
| Pais / Sogros .....                       | <b>03</b> |
| Irmão (ãos) .....                         | <b>04</b> |
| Genro / Nora .....                        | <b>05</b> |
| Neto(s) .....                             | <b>06</b> |
| Outro familiar .....                      | <b>07</b> |
| Outro NÃO Familiar (não remunerado) ..... | <b>08</b> |
| Cuidador (remunerado) .....               | <b>09</b> |
| Empregada .....                           | <b>10</b> |
| NS .....                                  | <b>98</b> |
| NR .....                                  | <b>99</b> |

D.19l

O(A) Sr(a) **COSTUMA UTILIZAR O CAIXA ELETRÔNICO DO BANCO** (para retirar dinheiro, pagar contas, etc)?

**D56**

|                      |          |                      |
|----------------------|----------|----------------------|
| Não .....            | <b>1</b> | } <b>Vá para D58</b> |
| SIM, SEM AJUDA ..... | <b>2</b> |                      |
| SIM, COM AJUDA ..    | <b>3</b> |                      |
| NS .....             | <b>8</b> |                      |
| NR .....             | <b>9</b> |                      |

D.19m

Por que **NÃO COSTUMA UTILIZAR O CAIXA ELETRÔNICO DO BANCO** (para retirar dinheiro, pagar contas, etc)?

**D57**

|                               |          |
|-------------------------------|----------|
| Não gosto .....               | <b>1</b> |
| Não estou acostumado(a) ..... | <b>2</b> |
| Tenho dificuldade ..          | <b>3</b> |
| Não preciso .....             | <b>4</b> |
| Outros.....                   | <b>5</b> |
| <i>(especifique)</i>          |          |
| NS .....                      | <b>8</b> |
| NR .....                      | <b>9</b> |

D.20a

O(A) Sr(a) tem dificuldade para **UTILIZAR ALGUM TIPO DE TRANSPORTE SOZINHO COMO ÔNIBUS, TAXI, METRÔ, ETC** para ir a outros lugares como igreja, médico, etc?

**D58**

|                         |          |
|-------------------------|----------|
| Sim .....               | <b>1</b> |
| Não costuma fazer ..... | <b>2</b> |
| Não .....               | <b>3</b> |
| NS .....                | <b>8</b> |
| NR .....                | <b>9</b> |

**SEÇÃO D – ESTADO FUNCIONAL**

D.20a1  
 O(A) Sr(a) precisa de ajuda para **UTILIZAR ALGUM TIPO DE TRANSPORTE COMO ÔNIBUS, TAXI, METRÔ, ETC?**

**D59**

- |           |   |                      |
|-----------|---|----------------------|
| Sim ..... | 1 | } Vá para <b>D62</b> |
| Não ..... | 2 |                      |
| NS .....  | 8 |                      |
| NR .....  | 9 |                      |

D.20b  
 Alguém costuma auxiliá-lo(a) a subir ou descer de um transporte ou lhe oferece transporte quando necessita ou ainda o(a) ajuda a consegui-lo (chamar um taxi, por exemplo)?

**D60**

- |           |   |                     |
|-----------|---|---------------------|
| Sim ..... | 1 | } <b>Vá p/ D 62</b> |
| Não ..... | 2 |                     |
| NS .....  | 8 |                     |
| NR .....  | 9 |                     |

D.20c  
 Quem o(a) ajuda a **UTILIZAR ALGUM TIPO DE TRANSPORTE?**

NOME:  
 \_\_\_\_\_

Se for referida mais que uma pessoa, anote o nome daquela que ajuda o(a) idoso(a) com mais frequência.

**D61**

- |                                           |    |
|-------------------------------------------|----|
| Cônjuge / Companheiro.....                | 01 |
| Filho(a) / Enteado(a) .....               | 02 |
| Pais / Sogros .....                       | 03 |
| Irmão (ãos) .....                         | 04 |
| Genro / Nora .....                        | 05 |
| Neto(s) .....                             | 06 |
| Outro familiar .....                      | 07 |
| Outro NÃO Familiar (não remunerado) ..... | 08 |
| Cuidador (remunerado) .....               | 09 |
| Empregada .....                           | 10 |
| NS .....                                  | 98 |
| NR .....                                  | 99 |

D.21a  
 O(A) Sr(a) tem dificuldade para **FAZER COMPRAS SOZINHO** (alimentos, produtos de limpeza, roupas, remédios, etc?)

**D62**

- |                         |   |
|-------------------------|---|
| Sim .....               | 1 |
| Não costuma fazer ..... | 2 |
| Não .....               | 3 |
| NS .....                | 8 |
| NR .....                | 9 |

**SEÇÃO D – ESTADO FUNCIONAL**

D.21a1

O(A) Sr(a) precisa de ajuda para **FAZER COMPRAS?**

**D63**

|           |   |                      |
|-----------|---|----------------------|
| Sim ..... | 1 | } Vá para <b>D66</b> |
| Não ..... | 2 |                      |
| NS .....  | 8 |                      |
| NR .....  | 9 |                      |

D.21b

O(A) Sr(a) recebe ajuda de alguém para **FAZER ESSAS COMPRAS?**

**D64**

|           |   |                      |
|-----------|---|----------------------|
| Sim ..... | 1 | } Vá para <b>D66</b> |
| Não ..... | 2 |                      |
| NS .....  | 8 |                      |
| NR .....  | 9 |                      |

D.21c

Quem o(a) ajuda a **FAZER ESSAS COMPRAS?**

NOME:

Se for referida mais que uma pessoa, anote o nome daquela que ajuda o(a) idoso(a) com mais frequência.

**D65**

|                                           |    |
|-------------------------------------------|----|
| Cônjuge / Companheiro.....                | 01 |
| Filho(a) / Enteado(a) .....               | 02 |
| Pais / Sogros .....                       | 03 |
| Irmão (ãos) .....                         | 04 |
| Genro / Nora .....                        | 05 |
| Neto(s) .....                             | 06 |
| Outro familiar .....                      | 07 |
| Outro NÃO Familiar (não remunerado) ..... | 08 |
| Cuidador (remunerado) .....               | 09 |
| Empregada .....                           | 10 |
| NS .....                                  | 98 |
| NR .....                                  | 99 |

D.22a

O(A) Sr(a) tem dificuldade para **UTILIZAR O TELEFONE FIXO OU ORELHÃO?**

**D66**

|                                |   |
|--------------------------------|---|
| Sim .....                      | 1 |
| Não tem telefone em casa ..... | 2 |
| Não .....                      | 3 |
| NS .....                       | 8 |
| NR .....                       | 9 |

**SEÇÃO D – ESTADO FUNCIONAL**

D.22a1  
 O(A) Sr(a) precisa de ajuda para **UTILIZAR O TELEFONE FIXO OU ORELHÃO?**

**D67**

|           |   |                      |
|-----------|---|----------------------|
| Sim ..... | 1 | } Vá para <b>D70</b> |
| Não ..... | 2 |                      |
| NS .....  | 8 |                      |
| NR .....  | 9 |                      |

D.22b  
 O(A) Sr(a) recebe ajuda de alguém quando precisa ou quer **UTILIZAR O TELEFONE FIXO OU ORELHÃO?**

**D68**

|           |   |                      |
|-----------|---|----------------------|
| Sim ..... | 1 | } Vá para <b>D70</b> |
| Não ..... | 2 |                      |
| NS .....  | 8 |                      |
| NR .....  | 9 |                      |

D.22c  
 Quem o(a) ajuda a **UTILIZAR O TELEFONE FIXO OU ORELHÃO?**

NOME:  
 \_\_\_\_\_

Se for referida mais que uma pessoa, anote o nome daquela que ajuda o(a) idoso(a) com mais frequência.

**D69**

|                                           |           |
|-------------------------------------------|-----------|
| Cônjuge / Companheiro.....                | <b>01</b> |
| Filho(a) / Enteadado(a) .....             | <b>02</b> |
| Pais / Sogros .....                       | <b>03</b> |
| Irmão (ãos) .....                         | <b>04</b> |
| Genro / Nora .....                        | <b>05</b> |
| Neto(s) .....                             | <b>06</b> |
| Outro familiar .....                      | <b>07</b> |
| Outro NÃO Familiar (não remunerado) ..... | <b>08</b> |
| Cuidador (remunerado) .....               | <b>09</b> |
| Empregada .....                           | <b>10</b> |
| NS .....                                  | <b>98</b> |
| NR .....                                  | <b>99</b> |

D.22l  
 O(A) Sr(a) **COSTUMA UTILIZAR TELEFONE CELULAR?**

**D70**

|                      |   |                      |
|----------------------|---|----------------------|
| Não .....            | 1 | } Vá para <b>D72</b> |
| SIM, SEM AJUDA ..... | 2 |                      |
| SIM, COM AJUDA ..    | 3 |                      |
| NS .....             | 8 |                      |
| NR .....             | 9 |                      |

SEÇÃO D – ESTADO FUNCIONAL

D.22m  
 Por que **NÃO COSTUMA UTILIZAR TELEFONE CELULAR?**

**D71**

- Não gosto ..... 1
- Não estou acostumado(a) ..... 2
- Tenho dificuldade .. ..... 3
- Não preciso ..... 4
- Não tenho telefone celular ..... 5
- Outros..... 6
- (especifique)*
- NS ..... 8
- NR ..... 9

D.23a  
 O(A) Sr(a) tem dificuldade para fazer **TAREFAS DOMÉSTICAS LEVES** como arrumar a cama, tirar pó dos móveis, etc?

**D72**

- Sim ..... 1
- Não costuma fazer ..... 2
- Não ..... 3
- NS ..... 8
- NR ..... 9

D.23a1  
 O(A) Sr(a) precisa de ajuda para fazer **TAREFAS DOMÉSTICAS LEVES?**

**D73**

- Sim ..... 1
  - Não ..... 2
  - NS ..... 8
  - NR ..... 9
- } Vá para **D76**

D.23b  
 O(A) Sr(a) recebe ajuda de alguém para fazer **TAREFAS DOMÉSTICAS LEVES?**

**D74**

- Sim ..... 1
  - Não ..... 2
  - NS ..... 8
  - NR ..... 9
- } Vá para **D76**



**SEÇÃO D – ESTADO FUNCIONAL**

D.23c

Quem o(a) ajuda a fazer **TAREFAS DOMÉSTICAS LEVES?**

NOME:

\_\_\_\_\_

Se for referida mais que uma pessoa, anote o nome daquela que ajuda o(a) idoso(a) com mais frequência.

**D75**

|                                           |           |
|-------------------------------------------|-----------|
| Cônjuge / Companheiro.....                | <b>01</b> |
| Filho(a) / Enteadado(a) .....             | <b>02</b> |
| Pais / Sogros .....                       | <b>03</b> |
| Irmão (ãos) .....                         | <b>04</b> |
| Genro / Nora .....                        | <b>05</b> |
| Neto(s) .....                             | <b>06</b> |
| Outro familiar .....                      | <b>07</b> |
| Outro NÃO Familiar (não remunerado) ..... | <b>08</b> |
| Cuidador (remunerado) .....               | <b>09</b> |
| Empregada/diarista .....                  | <b>10</b> |
| NS .....                                  | <b>98</b> |
| NR .....                                  | <b>99</b> |

D.24a

O(A) Sr(a) tem dificuldade para fazer **TAREFAS DOMÉSTICAS PESADAS** como limpar o chão, lavar o banheiro, lavar o quintal, etc?

**D76**

|                         |          |
|-------------------------|----------|
| Sim .....               | <b>1</b> |
| Não costuma fazer ..... | <b>2</b> |
| Não .....               | <b>3</b> |
| NS .....                | <b>8</b> |
| NR .....                | <b>9</b> |

D.24a1

O(A) Sr(a) precisa de ajuda para fazer **TAREFAS DOMÉSTICAS PESADAS?**

**D77**

|           |          |                      |
|-----------|----------|----------------------|
| Sim ..... | <b>1</b> | } Vá para <b>D80</b> |
| Não ..... | <b>2</b> |                      |
| NS .....  | <b>8</b> |                      |
| NR .....  | <b>9</b> |                      |

D.24b

O(A) Sr(a) recebe ajuda de alguém para fazer **TAREFAS DOMÉSTICAS PESADAS?**

**D78**

|           |          |                      |
|-----------|----------|----------------------|
| Sim ..... | <b>1</b> | } Vá para <b>D80</b> |
| Não ..... | <b>2</b> |                      |
| NS .....  | <b>8</b> |                      |
| NR .....  | <b>9</b> |                      |

**SEÇÃO D – ESTADO FUNCIONAL**

D.24c

Quem o(a) ajuda a fazer **TAREFAS DOMÉSTICAS PESADAS?**

NOME:

\_\_\_\_\_

Se for referida mais que uma pessoa, anote o nome daquela que ajuda o(a) idoso(a) com mais frequência.

**D79**

|                                           |           |
|-------------------------------------------|-----------|
| Cônjuge / Companheiro.....                | <b>01</b> |
| Filho(a) / Enteado(a) .....               | <b>02</b> |
| Pais / Sogros .....                       | <b>03</b> |
| Irmão (ãos) .....                         | <b>04</b> |
| Genro / Nora .....                        | <b>05</b> |
| Neto(s) .....                             | <b>06</b> |
| Outro familiar .....                      | <b>07</b> |
| Outro NÃO Familiar (não remunerado) ..... | <b>08</b> |
| Cuidador (remunerado) .....               | <b>09</b> |
| Empregada/diarista .....                  | <b>10</b> |
| NS .....                                  | <b>98</b> |
| NR .....                                  | <b>99</b> |

D.25a

O(A) Sr(a) tem dificuldade para **TOMAR SEUS REMÉDIOS SOZINHO?**

**D80**

|                         |                           |
|-------------------------|---------------------------|
| Sim .....               | <b>1</b>                  |
| Não .....               | <b>2</b>                  |
| Não toma remédios ..... | <b>3</b> Vá p/ <b>D85</b> |
| NS .....                | <b>8</b>                  |
| NR .....                | <b>9</b>                  |

D.25a1

O(A) Sr(a) precisa de ajuda para **TOMAR SEUS REMÉDIOS?**

**D81**

|           |          |                      |
|-----------|----------|----------------------|
| Sim ..... | <b>1</b> | } Vá para <b>D85</b> |
| Não ..... | <b>2</b> |                      |
| NS .....  | <b>8</b> |                      |
| NR .....  | <b>9</b> |                      |

D.25b

O(A) Sr(a) recebe ajuda de alguém para **TOMAR SEUS REMÉDIOS?**

**D82**

|           |          |                      |
|-----------|----------|----------------------|
| Sim ..... | <b>1</b> | } Vá para <b>D84</b> |
| Não ..... | <b>2</b> |                      |
| NS .....  | <b>8</b> |                      |
| NR .....  | <b>9</b> |                      |

D.25c

Quem o(a) ajuda a **TOMAR SEUS REMÉDIOS?**

NOME:

\_\_\_\_\_

Se for referida mais que uma pessoa, anote o nome daquela que ajuda o(a) idoso(a) com mais frequência.

**D83**

|                                           |           |                    |
|-------------------------------------------|-----------|--------------------|
| Cônjuge / Companheiro.....                | <b>01</b> | } Vá p/ <b>D85</b> |
| Filho(a) / Enteado(a) .....               | <b>02</b> |                    |
| Pais / Sogros .....                       | <b>03</b> |                    |
| Irmão (ãos) .....                         | <b>04</b> |                    |
| Genro / Nora .....                        | <b>05</b> |                    |
| Neto(s) .....                             | <b>06</b> |                    |
| Outro familiar .....                      | <b>07</b> |                    |
| Outro NÃO Familiar (não remunerado) ..... | <b>08</b> |                    |
| Cuidador (remunerado) .....               | <b>09</b> |                    |
| Empregada .....                           | <b>10</b> |                    |
| NS .....                                  | <b>98</b> |                    |
| NR .....                                  | <b>99</b> |                    |

**SEÇÃO D – ESTADO FUNCIONAL**

|                                                               |            |                                                                                                                                                            |
|---------------------------------------------------------------|------------|------------------------------------------------------------------------------------------------------------------------------------------------------------|
| D.25I<br>Como o(a) Sr(A) faz para <b>TOMAR SEUS REMÉDIOS?</b> | <b>D84</b> | Não toma ..... <b>1</b><br>Alguém deixa separado ..... <b>2</b><br>Outros ..... <b>3</b><br><i>(especifique)</i><br>NS ..... <b>8</b><br>NR ..... <b>9</b> |
|---------------------------------------------------------------|------------|------------------------------------------------------------------------------------------------------------------------------------------------------------|

|                                                                                                                                    |            |                                                                                                                                                                                                                                |
|------------------------------------------------------------------------------------------------------------------------------------|------------|--------------------------------------------------------------------------------------------------------------------------------------------------------------------------------------------------------------------------------|
| D.26<br>NÚMERO DE <b>CUIDADORES</b><br><b>DIFERENTES</b> MENCIONADOS PELO(A)<br>IDOSO(A) QUE O(A) AUXILIAM EM<br>SUAS DIFICULDADES | <b>D85</b> | NENHUM ..... <b>1</b><br>UM ..... <b>2</b><br>DOIS ..... <b>3</b><br>TRÊS ..... <b>4</b><br>QUATRO OU MAIS ..... <b>5</b><br>NÃO SE APLICA (não mencionou dificuldades) ... <b>6</b><br>NS ..... <b>8</b><br>NR ..... <b>9</b> |
|------------------------------------------------------------------------------------------------------------------------------------|------------|--------------------------------------------------------------------------------------------------------------------------------------------------------------------------------------------------------------------------------|

|                                                            |            |                                                                                                                                      |
|------------------------------------------------------------|------------|--------------------------------------------------------------------------------------------------------------------------------------|
| D.1<br>AS PERGUNTAS DA SEÇÃO D FORAM<br><b>RESPONDIDAS</b> | <b>D86</b> | PELO(A) PRÓPRIO(A) IDOSO (A) ..... <b>1</b><br>IDOSO(A) + INFORMANTE AUXILIAR ..... <b>2</b><br>INFORMANTE SUBSTITUTO ..... <b>3</b> |
|------------------------------------------------------------|------------|--------------------------------------------------------------------------------------------------------------------------------------|

**OBSERVAÇÕES:**

---

---

---

---

---

---

---

---

---

---

---

---

---

---

---

---

---

---

---

---

---

---

SEÇÃO D – ESTADO FUNCIONAL

**“AVALIAÇÃO DA QUALIDADE DE VIDA SF-12” (SÓ PARA O IDOSO)**

OS SEGUINTEs ITENS SÃO SOBRE ATIVIDADES QUE O(A) SR.(A) PODERIA FAZER ATUALMENTE DURANTE UM DIA COMUM. **DEVIDO A SUA SAÚDE**, O(A) SR.(A) TERIA DIFICULDADE PARA FAZER ESSAS ATIVIDADES? NESTE CASO, QUANTO? (circule um número para cada linha)!

| ATIVIDADES                                                                                                      | SIM<br>DIFICULTA<br>MUITO | SIM<br>DIFICULTA<br>UM<br>POUCO | NÃO<br>NÃO<br>DIFICULTA<br>DE MODO<br>ALGUM | NS | NR |
|-----------------------------------------------------------------------------------------------------------------|---------------------------|---------------------------------|---------------------------------------------|----|----|
| D29a. <b>Atividades moderadas</b> , tais como mover uma mesa, passar aspirador de pó, jogar bola, varrer a casa | 1                         | 2                               | 3                                           | 8  | 9  |
| D29b. Subir <b>vários</b> lances de escada                                                                      | 1                         | 2                               | 3                                           | 8  | 9  |

DURANTE AS **ÚLTIMAS QUATRO SEMANAS (Último mês)**, O(A) SR.(A) TEVE ALGUM DOS SEGUINTEs PROBLEMAS COM O SEU TRABALHO OU COM ALGUMA ATIVIDADE DIÁRIA REGULAR, **COMO CONSEQUÊNCIA DE SUA SAÚDE FÍSICA?** (circule uma em cada linha)

|                                                                              | Sim | Não | NS | NR |
|------------------------------------------------------------------------------|-----|-----|----|----|
| D.29c <b>Realizou menos</b> tarefas do que gostaria?                         | 1   | 2   | 8  | 9  |
| D.29d Esteve limitado no seu <b>tipo</b> de trabalho ou em outras atividades | 1   | 2   | 8  | 9  |

DURANTE AS **ÚLTIMAS QUATRO SEMANAS (Último mês)**, O(A) SR.(A) TEVE ALGUM DOS SEGUINTEs PROBLEMAS COM O SEU TRABALHO OU COM ALGUMA ATIVIDADE DIÁRIA REGULAR, **COMO CONSEQUÊNCIA DE ALGUM PROBLEMA EMOCIONAL (COMO SENTIR-SE DEPRIMIDO OU ANSIOSO)?** (circule uma em cada linha)

|                                                                                                      | Sim | Não | NS | NR |
|------------------------------------------------------------------------------------------------------|-----|-----|----|----|
| D.29e <b>Realizou menos</b> tarefas do que gostaria?                                                 | 1   | 2   | 8  | 9  |
| D.29f Não trabalhou ou não fez qualquer das atividades com tanto <b>cuidado</b> como geralmente faz? | 1   | 2   | 8  | 9  |

**SEÇÃO D – ESTADO FUNCIONAL**

DURANTE AS **ÚLTIMAS QUATRO SEMANAS (Último mês)**, QUANTO A **DOR** INTERFERIU COM O SEU TRABALHO NORMAL (INCLUINDO TANTO O TRABALHO, FORA DE CASA E DENTRO DE CASA)? (circule uma)

|       |                   |          |               |          |              |    |
|-------|-------------------|----------|---------------|----------|--------------|----|
| D.29g | De maneira alguma | Um pouco | Moderadamente | Bastante | Extremamente | NR |
|       | 1                 | 2        | 3             | 4        | 5            | 9  |

ESTAS QUESTÕES SÃO SOBRE COMO O(A) SR.(A) SE SENTE E COMO TUDO TEM ACONTECIDO COM O(A) SR.(A) DURANTE AS **ÚLTIMAS QUATRO SEMANAS (Último mês)**. PARA CADA QUESTÃO, POR FAVOR DÊ UMA RESPOSTA QUE MAIS SE APROXIME DA MANEIRA COMO O(A) SR.(A) SE SENTE EM RELAÇÃO AS ÚLTIMAS QUATRO SEMANAS. (circule um número para cada linha)

|                                                                        | TUDO TEMPO | A MAIOR PARTE DO TEMPO | UMA BOA PARTE DO TEMPO | ALGUMA PARTE DO TEMPO | UMA PEQUENA PARTE DO TEMPO | NUNCA | NS | NR |
|------------------------------------------------------------------------|------------|------------------------|------------------------|-----------------------|----------------------------|-------|----|----|
| D.29h.<br>Quanto tempo o(a) Sr.(a) tem se sentido calmo ou tranqüilo?  | 1          | 2                      | 3                      | 4                     | 5                          | 6     | 8  | 9  |
| D.29i<br>Quanto tempo o(a) Sr.(a) tem se sentido com muita energia?    | 1          | 2                      | 3                      | 4                     | 5                          | 6     | 8  | 9  |
| D.29j<br>Quanto tempo o(a) Sr.(a) tem se sentido desanimado e abatido? | 1          | 2                      | 3                      | 4                     | 5                          | 6     | 8  | 9  |

DURANTE AS **ÚLTIMAS QUATRO SEMANAS (Último mês)**, QUANTO DO SEU TEMPO A SUA SAÚDE FÍSICA OU PROBLEMAS EMOCIONAIS INTERFERIRAM **NAS SUAS ATIVIDADES SOCIAIS** (COMO VISITAR AMIGOS, PARENTES, ETC)? (circule uma)

| D.29K | TUDO TEMPO | A MAIOR PARTE DO TEMPO | UMA BOA PARTE DO TEMPO | ALGUMA PARTE DO TEMPO | UMA PEQUENA PARTE DO TEMPO | NUNCA | NS | NR |
|-------|------------|------------------------|------------------------|-----------------------|----------------------------|-------|----|----|
|       | 1          | 2                      | 3                      | 4                     | 5                          | 6     | 8  | 9  |

## D.27 - AVALIAÇÃO DAS ATIVIDADES AVANÇADAS DE VIDA DIÁRIA (DEVE SER RESPONDIDO PELO(A) PRÓPRIO(A) IDOSO(A))

Vou fazer algumas perguntas relacionadas à algumas atividades.  
Gostaria de saber se o(a) Sr(a) as executa e os motivos pelos quais as faz ou não.

**D.27\_1a**

Mantém contato com outras pessoas por meio de cartas, telefone ou email?

|           |     |               |
|-----------|-----|---------------|
| SIM ..... | 1   |               |
| NÃO ..... | 2 → | VÁ p/ 27_1c   |
| NS .....  | 8   | } VÁ p/ 27_2a |
| NR .....  | 9   |               |

**D.27\_1b**

Gostaria de saber qual o principal motivo pelo qual o(s) Sr(a) **FAZ** essa atividade

|                                  |   |                 |
|----------------------------------|---|-----------------|
| LAZER .....                      | 1 | } Vá para 27_1d |
| TRABALHO .....                   | 2 |                 |
| CONTATO SOCIAL .....             | 3 |                 |
| ATIVIDADE FÍSICA/EXERCÍCIO ..... | 4 |                 |
| OUTROS _____<br>ESPECIFIQUE      | 5 |                 |
| NS .....                         | 8 |                 |
| NR .....                         | 9 |                 |

**D.27\_1c**

Gostaria de saber qual o motivo pelo qual o(s) Sr(a) **NÃO FAZ** essa atividade

|                                                         |   |
|---------------------------------------------------------|---|
| NÃO TENHO INTERESSE NELA/NÃO GOSTO .....                | 1 |
| LIMITAÇÃO FUNCIONAL .....                               | 2 |
| NECESSITO DE AJUDA PARA EXECUTÁ-LA, MAS NÃO A TENHO ... | 3 |
| OUTROS _____<br>ESPECIFIQUE                             | 4 |
| NS .....                                                | 8 |
| NR .....                                                | 9 |

**D.27\_1d**

Quanto o(a) Sr(a) se sente limitado para executar essa atividade

|                          |   |
|--------------------------|---|
| NADA .....               | 1 |
| UM POUCO/ ÀS VEZES ..... | 2 |
| MUITO / TOTALMENTE ..... | 3 |
| NS .....                 | 8 |
| NR .....                 | 9 |

**D.27\_2a**

Visita seus amigos e familiares em suas casas

|           |     |               |
|-----------|-----|---------------|
| SIM ..... | 1   |               |
| NÃO ..... | 2 → | VÁ p/ 27_2c   |
| NS .....  | 8   | } VÁ p/ 27_3a |
| NR .....  | 9   |               |



**D.27\_3c**  
 Gostaria de saber qual o motivo pelo qual o(s) Sr(a) **NÃO FAZ** essa atividade

- NÃO TENHO INTERESSE NELA/NÃO GOSTO ..... 1
- LIMITAÇÃO FUNCIONAL ..... 2
- NECESSITO DE AJUDA PARA EXECUTÁ-LA, MAS NÃO A TENHO ... 3
- OUTROS \_\_\_\_\_ 4  
ESPECIFIQUE
- NS ..... 8
- NR ..... 9

**D.27\_3d**  
 Quanto o(a) Sr(a) se sente limitado para executar essa atividade

- NADA ..... 1
- UM POUCO/ ÀS VEZES ..... 2
- MUITO / TOTALMENTE ..... 3
- NS ..... 8
- NR ..... 9

**D.27\_4a**  
 Cuida dos afazeres domésticos de sua casa (limpeza e arrumação da casa, lavagem de roupas, pequenos reparos da casa.

- SIM ..... 1
- NÃO ..... 2 → **VÁ p/ 27\_4c**
- NS ..... 8 } **VÁ p/ 27\_5a**
- NR ..... 9 }

**D.27\_4b**  
 Gostaria de saber qual o principal motivo pelo qual o(s) Sr(a) **FAZ** essa atividade

- LAZER ..... 1
  - TRABALHO ..... 2
  - CONTATO SOCIAL ..... 3
  - ATIVIDADE FÍSICA/EXERCÍCIO ..... 4
  - OUTROS \_\_\_\_\_ 5  
ESPECIFIQUE
  - NS ..... 8
  - NR ..... 9
- Vá para 27\_4d**

**D.27\_4c**  
 Gostaria de saber qual o motivo pelo qual o(s) Sr(a) **NÃO FAZ** essa atividade

- NÃO TENHO INTERESSE NELA/NÃO GOSTO ..... 1
- LIMITAÇÃO FUNCIONAL ..... 2
- NECESSITO DE AJUDA PARA EXECUTÁ-LA, MAS NÃO A TENHO ... 3
- OUTROS \_\_\_\_\_ 4  
ESPECIFIQUE
- NS ..... 8
- NR ..... 9

**D.27\_4d**  
 Quanto o(a) Sr(a) se sente limitado para executar essa atividade

- NADA ..... 1
- UM POUCO/ ÀS VEZES ..... 2
- MUITO / TOTALMENTE ..... 3
- NS ..... 8
- NR ..... 9



**D.27\_5a**  
Trabalha como voluntário fora de casa?

SIM ..... 1  
NÃO ..... 2 → **VÁ p/ 27\_5c**  
NS ..... 8  
NR ..... 9 } **VÁ p/ 27\_6a**

**D.27\_5b**  
Gostaria de saber qual o principal motivo pelo qual o(s) Sr(a) **FAZ** essa atividade

LAZER ..... 1  
TRABALHO ..... 2  
CONTATO SOCIAL ..... 3  
ATIVIDADE FÍSICA/EXERCÍCIO ..... 4  
OUTROS ..... 5  
                                                ESPECIFIQUE  
NS ..... 8  
NR ..... 9 } **Vá para 27\_5d**

**D.27\_5c**  
Gostaria de saber qual o motivo pelo qual o(s) Sr(a) **NÃO FAZ** essa atividade

NÃO TENHO INTERESSE NELA/NÃO GOSTO ..... 1  
LIMITAÇÃO FUNCIONAL ..... 2  
NECESSITO DE AJUDA PARA EXECUTÁ-LA, MAS NÃO A TENHO ... 3  
OUTROS ..... 4  
                                                ESPECIFIQUE  
NS ..... 8  
NR ..... 9

**D.27\_5d**  
Quanto o(a) Sr(a) se sente limitado para executar essa atividade

NADA ..... 1  
UM POUCO/ ÀS VEZES ..... 2  
MUITO / TOTALMENTE ..... 3  
NS ..... 8  
NR ..... 9

**D.27\_6a**  
Cuida dos próprios negócios e finanças (dinheiro, pagamento de contas, negocia com o senhorio ou inquilino, com empresas ou agências governamentais)?

SIM ..... 1  
NÃO ..... 2 → **VÁ p/ 27\_6c**  
NS ..... 8  
NR ..... 9 } **VÁ p/ 27\_7a**

**D.27\_6b**  
Gostaria de saber qual o principal motivo pelo qual o(s) Sr(a) **FAZ** essa atividade

LAZER ..... 1  
TRABALHO ..... 2  
CONTATO SOCIAL ..... 3  
ATIVIDADE FÍSICA/EXERCÍCIO ..... 4  
OUTROS ..... 5  
                                                ESPECIFIQUE  
NS ..... 8  
NR ..... 9 } **Vá para 27\_6d**

**D.27\_6c**

Gostaria de saber qual o motivo pelo qual o(s) Sr(a) **NÃO FAZ** essa atividade

- NÃO TENHO INTERESSE NELA/NÃO GOSTO ..... 1
- LIMITAÇÃO FUNCIONAL ..... 2
- NECESSITO DE AJUDA PARA EXECUTÁ-LA, MAS NÃO A TENHO ... 3
- OUTROS ..... 4
- ESPECIFIQUE
- NS ..... 8
- NR ..... 9

**D.27\_6d**

Quanto o(a) Sr(a) se sente limitado para executar essa atividade

- NADA ..... 1
- UM POUCO/ ÀS VEZES ..... 2
- MUITO / TOTALMENTE ..... 3
- NS ..... 8
- NR ..... 9

**D.27\_7a**

Cuida da própria saúde (inclui o manejo diário das medicações, seguimento de dieta especial, agendamento de consultas médicas).

- SIM ..... 1
- NÃO ..... 2 → VÁ p/ 27\_7c
- NS ..... 8 } VÁ p/ 27\_8a
- NR ..... 9

**D.27\_7b**

Gostaria de saber qual o principal motivo pelo qual o(s) Sr(a) **FAZ** essa atividade

- LAZER ..... 1
  - TRABALHO ..... 2
  - CONTATO SOCIAL ..... 3
  - ATIVIDADE FÍSICA/EXERCÍCIO ..... 4
  - OUTROS ..... 5
  - ESPECIFIQUE
  - NS ..... 8
  - NR ..... 9
- Vá para 27\_7d

**D.27\_7c**

Gostaria de saber qual o motivo pelo qual o(s) Sr(a) **NÃO FAZ** essa atividade

- NÃO TENHO INTERESSE NELA/NÃO GOSTO ..... 1
- LIMITAÇÃO FUNCIONAL ..... 2
- NECESSITO DE AJUDA PARA EXECUTÁ-LA, MAS NÃO A TENHO ... 3
- OUTROS ..... 4
- ESPECIFIQUE
- NS ..... 8
- NR ..... 9

**D.27\_7d**

Quanto o(a) Sr(a) se sente limitado para executar essa atividade

- NADA ..... 1
- UM POUCO/ ÀS VEZES ..... 2
- MUITO / TOTALMENTE ..... 3
- NS ..... 8
- NR ..... 9

**D.27\_8a**

Viaja para fora da cidade pernoitando pelo menos uma noite?

- SIM ..... 1  
NÃO ..... 2 → VÁ p/ 27\_8c  
NS ..... 8 } VÁ p/ 27\_9a  
NR ..... 9

**D.27\_8b**

Gostaria de saber qual o principal motivo pelo qual o(s) Sr(a) **FAZ** essa atividade

- LAZER ..... 1  
TRABALHO ..... 2  
CONTATO SOCIAL ..... 3  
ATIVIDADE FÍSICA/EXERCÍCIO ..... 4  
OUTROS ..... 5  
                                            ESPECIFIQUE  
NS ..... 8  
NR ..... 9
- Vá para 27\_8d

**D.27\_8c**

Gostaria de saber qual o motivo pelo qual o(s) Sr(a) **NÃO FAZ** essa atividade

- NÃO TENHO INTERESSE NELA/NÃO GOSTO ..... 1  
LIMITAÇÃO FUNCIONAL ..... 2  
NECESSITO DE AJUDA PARA EXECUTÁ-LA, MAS NÃO A TENHO ... 3  
OUTROS ..... 4  
                                            ESPECIFIQUE  
NS ..... 8  
NR ..... 9

**D.27\_8d**

Quanto o(a) Sr(a) se sente limitado para executar essa atividade

- NADA ..... 1  
UM POUCO/ ÀS VEZES ..... 2  
MUITO / TOTALMENTE ..... 3  
NS ..... 8  
NR ..... 9

**D.27\_9a**

Participa de algum programa de exercícios regulares, tais como esportes, exercícios físicos, caminhadas e grupos de práticas corporais?

- SIM ..... 1  
NÃO ..... 2 → VÁ p/ 27\_9c  
NS ..... 8 } VÁ p/ 27\_10a  
NR ..... 9

**D.27\_9b**

Gostaria de saber qual o principal motivo pelo qual o(s) Sr(a) **FAZ** essa atividade

- LAZER ..... 1  
TRABALHO ..... 2  
CONTATO SOCIAL ..... 3  
ATIVIDADE FÍSICA/EXERCÍCIO ..... 4  
OUTROS ..... 5  
                                            ESPECIFIQUE  
NS ..... 8  
NR ..... 9
- Vá para 27\_9d

**D.27\_9c**

Gostaria de saber qual o motivo pelo qual o(s) Sr(a) **NÃO FAZ** essa atividade

- NÃO TENHO INTERESSE NELA/NÃO GOSTO ..... 1
- LIMITAÇÃO FUNCIONAL ..... 2
- NECESSITO DE AJUDA PARA EXECUTÁ-LA, MAS NÃO A TENHO ... 3
- OUTROS \_\_\_\_\_ 4
- ESPECIFIQUE
- NS ..... 8
- NR ..... 9

**D.27\_9d**

Quanto o(a) Sr(a) se sente limitado para executar essa atividade

- NADA ..... 1
- UM POUCO/ ÀS VEZES ..... 2
- MUITO / TOTALMENTE ..... 3
- NS ..... 8
- NR ..... 9

**D.27\_10a**

Convida pessoas para virem à sua casa para refeições ou lazer?

- SIM ..... 1
- NÃO ..... 2 → VÁ p/ 27\_10c
- NS ..... 8 } VÁ p/ 27\_11a
- NR ..... 9 }

**D.27\_10b**

Gostaria de saber qual o principal motivo pelo qual o(s) Sr(a) **FAZ** essa atividade

- LAZER ..... 1
  - TRABALHO ..... 2
  - CONTATO SOCIAL ..... 3
  - ATIVIDADE FÍSICA/EXERCÍCIO ..... 4
  - OUTROS \_\_\_\_\_ 5
  - ESPECIFIQUE
  - NS ..... 8
  - NR ..... 9
- Vá para 27\_10d

**D.27\_10c**

Gostaria de saber qual o motivo pelo qual o(s) Sr(a) **NÃO FAZ** essa atividade

- NÃO TENHO INTERESSE NELA/NÃO GOSTO ..... 1
- LIMITAÇÃO FUNCIONAL ..... 2
- NECESSITO DE AJUDA PARA EXECUTÁ-LA, MAS NÃO A TENHO ... 3
- OUTROS \_\_\_\_\_ 4
- ESPECIFIQUE
- NS ..... 8
- NR ..... 9

**D.27\_10d**

Quanto o(a) Sr(a) se sente limitado para executar essa atividade

- NADA ..... 1
- UM POUCO/ ÀS VEZES ..... 2
- MUITO / TOTALMENTE ..... 3
- NS ..... 8
- NR ..... 9





**D.27\_14a**  
Cuida de suas responsabilidades pessoais (compras em geral, compras de alimentos ir ao banco, lavanderia, etc)?

|           |     |                       |
|-----------|-----|-----------------------|
| SIM ..... | 1   |                       |
| NÃO ..... | 2 → | <b>VÁ p/ 27_14c</b>   |
| NS .....  | 8   | } <b>VÁ p/ 27_15a</b> |
| NR .....  | 9   |                       |

**D.27\_14b**  
Gostaria de saber qual o principal motivo pelo qual o(s) Sr(a) **FAZ** essa atividade

|                                  |   |                         |
|----------------------------------|---|-------------------------|
| LAZER .....                      | 1 | } <b>Vá para 27_14d</b> |
| TRABALHO .....                   | 2 |                         |
| CONTATO SOCIAL .....             | 3 |                         |
| ATIVIDADE FÍSICA/EXERCÍCIO ..... | 4 |                         |
| OUTROS _____<br>ESPECIFIQUE      | 5 |                         |
| NS .....                         | 8 |                         |
| NR .....                         | 9 |                         |

**D.27\_14c**  
Gostaria de saber qual o motivo pelo qual o(s) Sr(a) **NÃO FAZ** essa atividade

|                                                         |   |
|---------------------------------------------------------|---|
| NÃO TENHO INTERESSE NELA/NÃO GOSTO .....                | 1 |
| LIMITAÇÃO FUNCIONAL .....                               | 2 |
| NECESSITO DE AJUDA PARA EXECUTÁ-LA, MAS NÃO A TENHO ... | 3 |
| OUTROS _____<br>ESPECIFIQUE                             | 4 |
| NS .....                                                | 8 |
| NR .....                                                | 9 |

**D.27\_14d**  
Quanto o(a) Sr(a) se sente limitado para executar essa atividade

|                          |   |
|--------------------------|---|
| NADA .....               | 1 |
| UM POUCO/ ÀS VEZES ..... | 2 |
| MUITO / TOTALMENTE ..... | 3 |
| NS .....                 | 8 |
| NR .....                 | 9 |

**D.27\_15a**  
Prepara as próprias refeições (incluindo planejamento, preparação, servir e limpeza posterior)?

|           |     |                       |
|-----------|-----|-----------------------|
| SIM ..... | 1   |                       |
| NÃO ..... | 2 → | <b>VÁ p/ 27_15c</b>   |
| NS .....  | 8   | } <b>VÁ p/ 27_16a</b> |
| NR .....  | 9   |                       |

**D.27\_15b**  
Gostaria de saber qual o principal motivo pelo qual o(s) Sr(a) **FAZ** essa atividade

|                                  |   |                         |
|----------------------------------|---|-------------------------|
| LAZER .....                      | 1 | } <b>Vá para 27_15d</b> |
| TRABALHO .....                   | 2 |                         |
| CONTATO SOCIAL .....             | 3 |                         |
| ATIVIDADE FÍSICA/EXERCÍCIO ..... | 4 |                         |
| OUTROS _____<br>ESPECIFIQUE      | 5 |                         |
| NS .....                         | 8 |                         |
| NR .....                         | 9 |                         |







**D.27\_18c**  
 Gostaria de saber qual o motivo pelo qual o(s) Sr(a) **NÃO FAZ** essa atividade

- NÃO TENHO INTERESSE NELA/NÃO GOSTO ..... 1
- LIMITAÇÃO FUNCIONAL ..... 2
- NECESSITO DE AJUDA PARA EXECUTÁ-LA, MAS NÃO A TENHO ... 3
- OUTROS \_\_\_\_\_ 4  
ESPECIFIQUE
- NS ..... 8
- NR ..... 9

**D.27\_18d**  
 Quanto o(a) Sr(a) se sente limitado para executar essa atividade?

- NADA ..... 1
- UM POUCO/ ÀS VEZES ..... 2
- MUITO / TOTALMENTE ..... 3
- NS ..... 8
- NR ..... 9

**D.27\_19a**  
 Envolve-se em jogos de mesa, tais como jogo de damas, dominó, baralho, etc?

- SIM ..... 1
- NÃO ..... 2 → **VÁ p/ 27\_19c**
- NS ..... 8 } **VÁ p/ 27\_20a**
- NR ..... 9 }

**D.27\_19b**  
 Gostaria de saber qual o principal motivo pelo qual o(s) Sr(a) **FAZ** essa atividade

- LAZER ..... 1
  - TRABALHO ..... 2
  - CONTATO SOCIAL ..... 3
  - ATIVIDADE FÍSICA/EXERCÍCIO ..... 4
  - OUTROS \_\_\_\_\_ 5  
ESPECIFIQUE
  - NS ..... 8
  - NR ..... 9
- Vá para 27\_19d**

**D.27\_19c**  
 Gostaria de saber qual o motivo pelo qual o(s) Sr(a) **NÃO FAZ** essa atividade

- NÃO TENHO INTERESSE NELA/NÃO GOSTO ..... 1
- LIMITAÇÃO FUNCIONAL ..... 2
- NECESSITO DE AJUDA PARA EXECUTÁ-LA, MAS NÃO A TENHO ... 3
- OUTROS \_\_\_\_\_ 4  
ESPECIFIQUE
- NS ..... 8
- NR ..... 9

**D.27\_19d**  
 Quanto o(a) Sr(a) se sente limitado para executar essa atividade?

- NADA ..... 1
- UM POUCO/ ÀS VEZES ..... 2
- MUITO / TOTALMENTE ..... 3
- NS ..... 8
- NR ..... 9





**D.27\_23a**

Realiza atividades culturais: vai ao cinema, teatro, shows, festas, bingos, museus, concertos, eventos esportivos?

|           |     |                       |
|-----------|-----|-----------------------|
| SIM ..... | 1   |                       |
| NÃO ..... | 2 → | <b>VÁ p/ 27_23c</b>   |
| NS .....  | 8   | } <b>VÁ p/ 27_24a</b> |
| NR .....  | 9   |                       |

**D.27\_23b**

Gostaria de saber qual o principal motivo pelo qual o(s) Sr(a) **FAZ** essa atividade

|                                  |   |                         |             |
|----------------------------------|---|-------------------------|-------------|
| LAZER .....                      | 1 | } <b>Vá para 27_23d</b> |             |
| TRABALHO .....                   | 2 |                         |             |
| CONTATO SOCIAL .....             | 3 |                         |             |
| ATIVIDADE FÍSICA/EXERCÍCIO ..... | 4 |                         |             |
| OUTROS _____                     | 5 |                         | ESPECIFIQUE |
| NS .....                         | 8 |                         |             |
| NR .....                         | 9 |                         |             |

**D.27\_23c**

Gostaria de saber qual o motivo pelo qual o(s) Sr(a) **NÃO FAZ** essa atividade

|                                                         |   |             |
|---------------------------------------------------------|---|-------------|
| NÃO TENHO INTERESSE NELA/NÃO GOSTO .....                | 1 |             |
| LIMITAÇÃO FUNCIONAL .....                               | 2 |             |
| NECESSITO DE AJUDA PARA EXECUTÁ-LA, MAS NÃO A TENHO ... | 3 |             |
| OUTROS _____                                            | 4 | ESPECIFIQUE |
| NS .....                                                | 8 |             |
| NR .....                                                | 9 |             |

**D.27\_23d**

Quanto o(a) Sr(a) se sente limitado para executar essa atividade

|                          |   |
|--------------------------|---|
| NADA .....               | 1 |
| UM POUCO/ ÀS VEZES ..... | 2 |
| MUITO / TOTALMENTE ..... | 3 |
| NS .....                 | 8 |
| NR .....                 | 9 |

**D.27\_24a**

Participa de atividades políticas: em partidos políticos, associações civis, lideranças comunitárias, cooperativas?

|           |     |                       |
|-----------|-----|-----------------------|
| SIM ..... | 1   |                       |
| NÃO ..... | 2 → | <b>VÁ p/ 27_24c</b>   |
| NS .....  | 8   | } <b>VÁ p/ 27_25a</b> |
| NR .....  | 9   |                       |

**D.27\_24b**

Gostaria de saber qual o principal motivo pelo qual o(s) Sr(a) **FAZ** essa atividade

|                                  |   |                         |             |
|----------------------------------|---|-------------------------|-------------|
| LAZER .....                      | 1 | } <b>Vá para 27_24d</b> |             |
| TRABALHO .....                   | 2 |                         |             |
| CONTATO SOCIAL .....             | 3 |                         |             |
| ATIVIDADE FÍSICA/EXERCÍCIO ..... | 4 |                         |             |
| OUTROS _____                     | 5 |                         | ESPECIFIQUE |
| NS .....                         | 8 |                         |             |
| NR .....                         | 9 |                         |             |



**D.27\_26a**

Cuida de animais domésticos?

|           |   |                |
|-----------|---|----------------|
| SIM ..... | 1 |                |
| NÃO ..... | 2 | → VÁ p/ 27_26c |
| NS .....  | 8 | } VÁ p/ 27_27a |
| NR .....  | 9 |                |

**D.27\_26b**Gostaria de saber qual o principal motivo pelo qual o(s) Sr(a) **FAZ** essa atividade

|                                  |   |                  |
|----------------------------------|---|------------------|
| LAZER .....                      | 1 | } Vá para 27_26d |
| TRABALHO .....                   | 2 |                  |
| CONTATO SOCIAL .....             | 3 |                  |
| ATIVIDADE FÍSICA/EXERCÍCIO ..... | 4 |                  |
| OUTROS _____<br>ESPECIFIQUE      | 5 |                  |
| NS .....                         | 8 |                  |
| NR .....                         | 9 |                  |

**D.27\_26c**Gostaria de saber qual o motivo pelo qual o(s) Sr(a) **NÃO FAZ** essa atividade

|                                                         |   |
|---------------------------------------------------------|---|
| NÃO TENHO INTERESSE NELA/NÃO GOSTO .....                | 1 |
| LIMITAÇÃO FUNCIONAL .....                               | 2 |
| NECESSITO DE AJUDA PARA EXECUTÁ-LA, MAS NÃO A TENHO ... | 3 |
| OUTROS _____<br>ESPECIFIQUE                             | 4 |
| NS .....                                                | 8 |
| NR .....                                                | 9 |

**D.27\_26d**

Quanto o(a) Sr(a) se sente limitado para executar essa atividade

|                          |   |
|--------------------------|---|
| NADA .....               | 1 |
| UM POUCO/ ÀS VEZES ..... | 2 |
| MUITO / TOTALMENTE ..... | 3 |
| NS .....                 | 8 |
| NR .....                 | 9 |

**D.27\_27a**

Reza ou ora em casa?

|           |   |                |
|-----------|---|----------------|
| SIM ..... | 1 |                |
| NÃO ..... | 2 | → VÁ p/ 27_27c |
| NS .....  | 8 | } VÁ p/ 27_28a |
| NR .....  | 9 |                |

**D.27\_27b**Gostaria de saber qual o principal motivo pelo qual o(s) Sr(a) **FAZ** essa atividade

|                                  |   |                  |
|----------------------------------|---|------------------|
| LAZER .....                      | 1 | } Vá para 27_27d |
| TRABALHO .....                   | 2 |                  |
| CONTATO SOCIAL .....             | 3 |                  |
| ATIVIDADE FÍSICA/EXERCÍCIO ..... | 4 |                  |
| OUTROS _____<br>ESPECIFIQUE      | 5 |                  |
| NS .....                         | 8 |                  |
| NR .....                         | 9 |                  |

**D.27\_27c**

Gostaria de saber qual o motivo pelo qual o(s) Sr(a) **NÃO FAZ** essa atividade

|                                                         |   |
|---------------------------------------------------------|---|
| NÃO TENHO INTERESSE NELA/NÃO GOSTO .....                | 1 |
| LIMITAÇÃO FUNCIONAL .....                               | 2 |
| NECESSITO DE AJUDA PARA EXECUTÁ-LA, MAS NÃO A TENHO ... | 3 |
| OUTROS _____                                            | 4 |
| ESPECIFIQUE                                             |   |
| NS .....                                                | 8 |
| NR .....                                                | 9 |

**D.27\_27d**

Quanto o(a) Sr(a) se sente limitado para executar essa atividade?

|                          |   |
|--------------------------|---|
| NADA .....               | 1 |
| UM POUCO/ ÀS VEZES ..... | 2 |
| MUITO / TOTALMENTE ..... | 3 |
| NS .....                 | 8 |
| NR .....                 | 9 |

**D.27\_28a**

Participa de bate papos na internet ou utiliza redes sociais (facebook, orkut, etc)?

|           |     |
|-----------|-----|
| SIM ..... | 1   |
| NÃO ..... | 2 → |
| NS .....  | 8   |
| NR .....  | 9   |

VÁ p/ 27\_28c

VÁ p/ E1

**D.27\_28b**

Gostaria de saber qual o principal motivo pelo qual o(s) Sr(a) **FAZ** essa atividade

|                                  |   |
|----------------------------------|---|
| LAZER .....                      | 1 |
| TRABALHO .....                   | 2 |
| CONTATO SOCIAL .....             | 3 |
| ATIVIDADE FÍSICA/EXERCÍCIO ..... | 4 |
| OUTROS _____                     | 5 |
| ESPECIFIQUE                      |   |
| NS .....                         | 8 |
| NR .....                         | 9 |

Vá para 27\_28d

**D.27\_28c**

Gostaria de saber qual o motivo pelo qual o(s) Sr(a) **NÃO FAZ** essa atividade

|                                                         |   |
|---------------------------------------------------------|---|
| NÃO TENHO INTERESSE NELA/NÃO GOSTO .....                | 1 |
| LIMITAÇÃO FUNCIONAL .....                               | 2 |
| NECESSITO DE AJUDA PARA EXECUTÁ-LA, MAS NÃO A TENHO ... | 3 |
| OUTROS _____                                            | 4 |
| ESPECIFIQUE                                             |   |
| NS .....                                                | 8 |
| NR .....                                                | 9 |

**D.27\_28d**

Quanto o(a) Sr(a) se sente limitado para executar essa atividade?

|                          |   |
|--------------------------|---|
| NADA .....               | 1 |
| UM POUCO/ ÀS VEZES ..... | 2 |
| MUITO / TOTALMENTE ..... | 3 |
| NS .....                 | 8 |
| NR .....                 | 9 |



**SEÇÃO E- MEDICAMENTOS**

**E. 1**  
O(a) Sr(a) poderia me mostrar os medicamentos (remédios) que está tomando (usando) atualmente?

Sim 1  
Não 2  
O(a) idoso(a) **NÃO TOMA** medicamentos 3 Vá para E.6

**E. 2 LISTA DE MEDICAMENTOS**  
O(A) Sr(a) poderia me dizer o nome dos medicamentos (remédios) que está tomando (usando)?  
Coloque o nome comercial e o nome genérico.  
Anote todos os medicamentos (remédios) mostrados ou referidos.

**E. 3 QUEM O RECEITOU?**  
Médico(a)..... 1  
Farmacêutico(a)..... 2  
Enfermeiro(a)..... 3  
O(a) próprio (a) idoso(a).... 4  
Outra pessoa..... 5  
NS..... 8  
NR..... 9

**E. 5a Como obteve o medicamento(remédio)?**  
O(a) idoso ou outra pessoa pagou por ele..... 1  
O(a) idoso ou outra pessoa obteve gratuitamente..... 2  
NS..... 8  
NR..... 9

| Medicamento (remédio) |                               |
|-----------------------|-------------------------------|
| 1                     | (nome comercial)              |
|                       | (nome genérico)               |
|                       | _ _ _ _ _ _ _ _ _ _ _ _ _ _ _ |

| Responsabilidade |
|------------------|
| _ _ _            |

| Obtenção |
|----------|
| _ _ _    |

|   |                               |
|---|-------------------------------|
| 2 | (nome comercial)              |
|   | (nome genérico)               |
|   | _ _ _ _ _ _ _ _ _ _ _ _ _ _ _ |

|       |
|-------|
| _ _ _ |
|-------|

|       |
|-------|
| _ _ _ |
|-------|

|   |                               |
|---|-------------------------------|
| 3 | (nome comercial)              |
|   | (nome genérico)               |
|   | _ _ _ _ _ _ _ _ _ _ _ _ _ _ _ |

|       |
|-------|
| _ _ _ |
|-------|

|       |
|-------|
| _ _ _ |
|-------|

|   |                               |
|---|-------------------------------|
| 4 | (nome comercial)              |
|   | (nome genérico)               |
|   | _ _ _ _ _ _ _ _ _ _ _ _ _ _ _ |

|       |
|-------|
| _ _ _ |
|-------|

|       |
|-------|
| _ _ _ |
|-------|

|   |                               |
|---|-------------------------------|
| 5 | (nome comercial)              |
|   | (nome genérico)               |
|   | _ _ _ _ _ _ _ _ _ _ _ _ _ _ _ |

|       |
|-------|
| _ _ _ |
|-------|

|       |
|-------|
| _ _ _ |
|-------|

**SEÇÃO E- MEDICAMENTOS**

|                                 |                  |
|---------------------------------|------------------|
| 6                               |                  |
|                                 | (nome comercial) |
|                                 | (nome genérico)  |
| _ _ _ _ _ _ _ _ _ _ _ _ _ _ _ _ |                  |

|       |
|-------|
| _ _ _ |
|-------|

|       |
|-------|
| _ _ _ |
|-------|

|                                 |                  |
|---------------------------------|------------------|
| 7                               |                  |
|                                 | (nome comercial) |
|                                 | (nome genérico)  |
| _ _ _ _ _ _ _ _ _ _ _ _ _ _ _ _ |                  |

|       |
|-------|
| _ _ _ |
|-------|

|       |
|-------|
| _ _ _ |
|-------|

|                                 |                  |
|---------------------------------|------------------|
| 8                               |                  |
|                                 | (nome comercial) |
|                                 | (nome genérico)  |
| _ _ _ _ _ _ _ _ _ _ _ _ _ _ _ _ |                  |

|       |
|-------|
| _ _ _ |
|-------|

|       |
|-------|
| _ _ _ |
|-------|

|                                 |                  |
|---------------------------------|------------------|
| 9                               |                  |
|                                 | (nome comercial) |
|                                 | (nome genérico)  |
| _ _ _ _ _ _ _ _ _ _ _ _ _ _ _ _ |                  |

|       |
|-------|
| _ _ _ |
|-------|

|       |
|-------|
| _ _ _ |
|-------|

|                                 |                  |
|---------------------------------|------------------|
| 10                              |                  |
|                                 | (nome comercial) |
|                                 | (nome genérico)  |
| _ _ _ _ _ _ _ _ _ _ _ _ _ _ _ _ |                  |

|       |
|-------|
| _ _ _ |
|-------|

|       |
|-------|
| _ _ _ |
|-------|

|                                 |                  |
|---------------------------------|------------------|
| 11                              |                  |
|                                 | (nome comercial) |
|                                 | (nome genérico)  |
| _ _ _ _ _ _ _ _ _ _ _ _ _ _ _ _ |                  |

|       |
|-------|
| _ _ _ |
|-------|

|       |
|-------|
| _ _ _ |
|-------|

|                                 |                  |
|---------------------------------|------------------|
| 12                              |                  |
|                                 | (nome comercial) |
|                                 | (nome genérico)  |
| _ _ _ _ _ _ _ _ _ _ _ _ _ _ _ _ |                  |

|       |
|-------|
| _ _ _ |
|-------|

|       |
|-------|
| _ _ _ |
|-------|

## SEÇÃO E- MEDICAMENTOS

|    |                                                     |     |     |
|----|-----------------------------------------------------|-----|-----|
| 13 |                                                     | _ _ | _ _ |
|    | (nome comercial)                                    |     |     |
|    | (nome genérico)<br> _ _ _ _ _ _ _ _ _ _ _ _ _ _ _ _ |     |     |
| 14 |                                                     | _ _ | _ _ |
|    | (nome comercial)                                    |     |     |
|    | (nome genérico)<br> _ _ _ _ _ _ _ _ _ _ _ _ _ _ _ _ |     |     |
| 15 |                                                     | _ _ | _ _ |
|    | (nome comercial)                                    |     |     |
|    | (nome genérico)<br> _ _ _ _ _ _ _ _ _ _ _ _ _ _ _ _ |     |     |
| 16 |                                                     | _ _ | _ _ |
|    | (nome comercial)                                    |     |     |
|    | (nome genérico)<br> _ _ _ _ _ _ _ _ _ _ _ _ _ _ _ _ |     |     |
| 17 |                                                     | _ _ | _ _ |
|    | (nome comercial)                                    |     |     |
|    | (nome genérico)<br> _ _ _ _ _ _ _ _ _ _ _ _ _ _ _ _ |     |     |
| 18 |                                                     | _ _ | _ _ |
|    | (nome comercial)                                    |     |     |
|    | (nome genérico)<br> _ _ _ _ _ _ _ _ _ _ _ _ _ _ _ _ |     |     |

Observações:

---



---



---



---



---

## SEÇÃO E- MEDICAMENTOS

E. 5b

De modo geral, como o(a) Sr(a) identifica seus medicamentos (remédios)?

|                        |   |              |
|------------------------|---|--------------|
| Pela COR.....          | 1 | } Vá para E6 |
| Pelo TAMANHO .....     | 2 |              |
| Pela FORMA .....       | 3 |              |
| Pelo NOME .....        | 4 |              |
| Pela EMBALAGEM .....   | 5 |              |
| De outra forma.....    | 6 |              |
| .....<br>(especifique) |   |              |
| Não identifica.....    | 7 |              |
| NS .....               | 8 |              |
| NR .....               | 9 |              |

E. 5c

Como o(a) Sr(a) disse que tem dificuldade para identificar seu(s) medicamento(s), diga-me como faz para tomá-los corretamente?

|                                          |   |
|------------------------------------------|---|
| Alguém fornece.....                      | 1 |
| Alguém deixa separado DIARIAMENTE .....  | 2 |
| Alguém deixa separado SEMANALMENTE ..... | 3 |
| De outra forma.....                      | 7 |
| .....<br>(especifique)                   | 8 |
| NS .....                                 | 9 |
| NR .....                                 |   |

E. 6

Atualmente, para cuidar de sua saúde, o(a) Sr(a) faz uso de CHÁS, ERVAS, PRODUTOS HOMEOPÁTICOS OU FITOTERÁPICOS?

|           |   |                       |
|-----------|---|-----------------------|
| Sim ..... | 1 | Volte para E2 e anote |
| Não ..... | 2 |                       |
| NS .....  | 8 |                       |
| NR .....  | 9 |                       |

E. 7a

Atualmente, para cuidar de sua saúde, o(a) Sr(a) faz uso VITAMINAS (em comprimidos) ou SUPLEMENTOS ALIMENTARES?

|           |   |                       |
|-----------|---|-----------------------|
| Sim ..... | 1 | Volte para E2 e anote |
| Não ..... | 2 |                       |
| NS .....  | 8 |                       |
| NR .....  | 9 |                       |

E. 7b

Atualmente, para cuidar de sua saúde, além do que o(a) Sr(a) já me falou, faz uso de laxantes, medicamentos para gripe, medicamentos para dormir?

|           |   |                       |
|-----------|---|-----------------------|
| Sim ..... | 1 | Volte para E2 e anote |
| Não ..... | 2 |                       |
| NS .....  | 8 |                       |
| NR .....  | 9 |                       |

E. 7c FILTRO

Número de medicamentos (remédios) utilizados pelo(a) idoso(a):

|                                                        |       |              |
|--------------------------------------------------------|-------|--------------|
| Não toma NENHUM.....                                   | 02    | Vá para E.9e |
| Toma APENAS UM .....                                   | 01    |              |
| Toma MAIS QUE UM.....                                  | 06    |              |
| Quantos medicamentos diferentes utiliza por dia? ..... | _ _ _ |              |
| NS .....                                               | 98    |              |
| NR.....                                                | 99    |              |

E. 8

Durante o último mês, no total, quanto o(a) Sr(a) gastou com medicamentos (remédios) incluindo seringas, cremes, pomadas, etc; comprados com ou sem receita médica?

|                  |                   |
|------------------|-------------------|
| Nada.....        | 0                 |
| Gasto total..... | R\$ _ _ _ _ , _ _ |
| NS .....         | 8                 |
| NR.....          | 9                 |

## SEÇÃO E- MEDICAMENTOS

E. 9a

Em algum momento, nos últimos 12 meses (último ano), o(a) Sr(a) deixou de tomar algum dos medicamentos (remédios) prescritos?

|           |   |               |
|-----------|---|---------------|
| Sim ..... | 1 | } Vá para E9c |
| Não ..... | 2 |               |
| NS .....  | 8 |               |
| NR .....  | 9 |               |

E. 9b

Por que?

|                                                     |   |
|-----------------------------------------------------|---|
| Não tinha dinheiro para comprar.....                | 1 |
| O medicamento (remédio) não estava disponível ..... | 2 |
| Não se sentiu bem quando tomou .....                | 3 |
| Não gosta de tomar medicamentos (remédios) .....    | 4 |
| Outro motivo .....                                  | 5 |
| .....<br>(especifique)                              |   |
| NS .....                                            | 8 |
| NR .....                                            | 9 |

E. 9c

Em algum momento, nos últimos 12 meses (último ano), o(a) Sr(a) tomou uma quantidade de medicamentos (remédios) **MENOR** do que estava prescrito?

|           |   |               |
|-----------|---|---------------|
| Sim ..... | 1 | } Vá para E9e |
| Não ..... | 2 |               |
| NS .....  | 8 |               |
| NR .....  | 9 |               |

E. 9d

Por que?

|                                                             |   |
|-------------------------------------------------------------|---|
| Não tinha dinheiro para comprar.....                        | 1 |
| O medicamento (remédio) não estava disponível .....         | 2 |
| Não se sentiu bem quando tomou .....                        | 3 |
| Não achei necessário tomar a quantidade (dose) prescrita .. | 4 |
| Outro motivo .....                                          | 5 |
| .....<br>(especifique)                                      |   |
| NS .....                                                    | 8 |
| NR .....                                                    | 9 |

E. 9e

Em algum momento, nos últimos 12 meses (último ano), o(a) Sr(a) **PAROU DE TOMAR** algum medicamento (remédio) porque **NÃO SE SENTIU BEM** quando tomou?

|           |   |                      |
|-----------|---|----------------------|
| Sim ..... | 1 | } Vá para<br>Seção F |
| Não ..... | 2 |                      |
| NS .....  | 8 |                      |
| NR .....  | 9 |                      |

E. 9f

O(a) Sr(a) poderia me dizer o nome desse (s) medicamento(s) (remédio(s))?

|                        |   |
|------------------------|---|
| Sim .....              | 1 |
| .....                  |   |
| .....                  |   |
| .....                  |   |
| .....                  |   |
| .....                  |   |
| .....                  |   |
| .....                  |   |
| .....                  |   |
| .....<br>(especifique) |   |
| Não .....              | 2 |
| Não lembra .....       | 8 |
| NR .....               | 9 |

**SEÇÃO F : USO E ACESSO A SERVIÇOS**

F.1b  
O(a) Sr(a) tem algum plano de saúde (convênio) além do Sistema único de Saúde:

**01**

|          |          |   |                   |
|----------|----------|---|-------------------|
| SIM..... | <b>1</b> | } | Vá para <b>05</b> |
| NÃO..... | <b>2</b> |   |                   |
| NS ..... | <b>8</b> |   |                   |
| NR ..... | <b>9</b> |   |                   |

F.1c  
Que tipo de plano de saúde o(a) Sr(a) tem?

ASSINALE TODAS AS RESPOSTAS MENCIONADAS

**02**

|                                             |           |
|---------------------------------------------|-----------|
| Plano de Assistência ao Servidor Público .. | <b>2</b>  |
| Plano de Saúde / Convênio Particular .....  | <b>6</b>  |
| Plano de Saúde / Convênio Empresa .....     | <b>7</b>  |
| Outro .....                                 | <b>8</b>  |
| NS .....                                    | <b>98</b> |
| NR .....                                    | <b>99</b> |

Especifique o nome do Convênio / Plano de Saúde:

\_\_\_\_\_

\_\_\_\_\_

\_\_\_\_\_

F.1d  
Quem paga pelo plano/convênio de saúde?

**03**

|                                 |           |
|---------------------------------|-----------|
| O próprio idoso (sozinho) ..... | <b>1</b>  |
| O idoso + outra pessoa .....    | <b>7</b>  |
| Outra pessoa .....              | <b>8</b>  |
| NS .....                        | <b>98</b> |
| NR .....                        | <b>99</b> |

F.1e  
Quanto paga pelo plano/convênio de saúde?

**04**

|                            |          |
|----------------------------|----------|
| __ __ __ __ , __ __  reais |          |
| NS .....                   | <b>8</b> |
| NR .....                   | <b>9</b> |

F.3b  
O(A) Sr(a) tem alguma dificuldade para utilizar ou acessar serviços de saúde, quando precisa?

**05**

|           |          |   |                   |
|-----------|----------|---|-------------------|
| Sim ..... | <b>1</b> | } | Vá para <b>07</b> |
| Não ..... | <b>2</b> |   |                   |
| NS .....  | <b>8</b> |   |                   |
| NR .....  | <b>9</b> |   |                   |

**SEÇÃO F : USO E ACESSO A SERVIÇOS**

F.3c  
Qual(is) o(s) motivo(s)?

**06**

- Não tenho dinheiro para o transporte ..... 1
- Não tem companhia para levá-lo(a) ..... 3
- Dificuldade para se locomover ..... 4
- O atendimento é ruim ..... 5
- A distância é muito longa ..... 7
- Outros: ..... 8
- (especifique)*
- NS ..... 98
- NR ..... 99

F.4a  
Durante os últimos 12 meses, o(a) Sr (a) precisou ser internado em um hospital POR PELO MENOS UMA NOITE?  
  
Exceto em CASA DE REPOUSO/ASILO

**07**

- Sim ..... 1
  - Quantas vezes: |\_\_|\_\_|
  - Não ..... 2
  - NS ..... 98
  - NR ..... 99
- } Vá para **15**

F.5b  
No total, quantos dias esteve internado nos últimos 12 meses?

**08**

- Número de dias: |\_\_|\_\_|
- NS ..... 98
- NR ..... 99

F.6  
Onde o(a) Sr(a) esteve internado pela ÚLTIMA VEZ?

**09**

- Hospital geral por motivos clínicos ..... 7
- Hospital geral por motivos cirúrgicos..... 8
- Outros ..... 6
- (especifique)*
- NS ..... 98
- NR ..... 99

F.6a  
Há quanto tempo foi essa ÚLTIMA INTERNAÇÃO?

**10**

- Há menos de 15 dias ..... 1
- Entre 15 dias e 1 mês ..... 2
- Entre 1 e 3 meses ..... 3
- Entre 4 e 6 meses ..... 4
- Entre 6 meses e 1 ano ..... 5
- Há mais de 1 ano ..... 6
- NS ..... 8
- NR ..... 9

**SEÇÃO F : USO E ACESSO A SERVIÇOS**

F.6c

O (a) Sr (a) poderia me dizer qual o **MOTIVO** dessa última internação?

**11**

Sim ..... **1**

\_\_\_\_\_

\_\_\_\_\_

\_\_\_\_\_

\_\_\_\_\_

\_\_\_\_\_

(especifique)

Prefere não dizer ..... **2**

NS ..... **98**

NR ..... **99**

F.6b

Poderia me dizer o nome e o endereço desse hospital?

**12**

Nome da Instituição:

\_\_\_\_\_

\_\_\_\_\_

\_\_\_\_\_

Endereço:

\_\_\_\_\_

\_\_\_\_\_

\_\_\_\_\_

NS ..... **98**

NR ..... **99**

F.9

Sua ÚLTIMA INTERNAÇÃO foi feita:

**13**

Pelo SUS ..... **1**

Pelo convênio / Plano de Saúde ..... **2**

Particular ..... **3**

NS ..... **8**

NR ..... **9**

F.10a

O(a) Sr(a) considera que o atendimento recebido nessa ÚLTIMA INTERNAÇÃO foi:

**14**

Muito Bom ..... **1**

Bom ..... **2**

Regular ..... **3**

Ruim ..... **4**

Muito Ruim ..... **5**

NS ..... **8**

NR ..... **9**



**SEÇÃO F : USO E ACESSO A SERVIÇOS**

F.12c  
 Excetuando-se a(s) internação(ões) que perguntei realizou algum atendimento de saúde de **URGÊNCIA / EMERGÊNCIA?**

**15**

|                       |          |                     |
|-----------------------|----------|---------------------|
| Sim.....              | <b>1</b> | } Vá para <b>21</b> |
| Quantas vezes:  __ __ |          |                     |
| Não .....             | <b>2</b> |                     |
| NS .....              | <b>8</b> |                     |
| NR .....              | <b>9</b> |                     |

F.12d  
 O(a) Sr(a) poderia me dizer o **MOTIVO** do último atendimento de **URGÊNCIA/EMERGÊNCIA?**

**16**

|                         |           |
|-------------------------|-----------|
| Sim .....               | <b>1</b>  |
| _____                   |           |
| _____                   |           |
| _____                   |           |
| _____                   |           |
| (especifique)           |           |
| Prefere não dizer ..... | <b>2</b>  |
| NS .....                | <b>98</b> |
| NR .....                | <b>99</b> |

F.12f  
 Há quanto tempo foi esse último atendimento de **URGÊNCIA/ EMERGÊNCIA?**

**17**

|                             |          |
|-----------------------------|----------|
| Há menos de 15 dias .....   | <b>1</b> |
| Entre 15 dias e 1 mês ..... | <b>2</b> |
| Entre 1 e 3 meses .....     | <b>3</b> |
| Entre 4 e 6 meses .....     | <b>4</b> |
| Entre 6 meses e 1 ano ..... | <b>5</b> |
| Há mais de 1 ano .....      | <b>6</b> |
| NS .....                    | <b>8</b> |
| NR .....                    | <b>9</b> |

F.12g  
 Quanto tempo demorou para chegar ao local onde fez o último atendimento desse tipo de **URGÊNCIA / EMERGÊNCIA?**

**18**

|                 |            |
|-----------------|------------|
| Minutos:  __ __ |            |
| Horas:  __ __   |            |
| NS .....        | <b>998</b> |
| NR .....        | <b>999</b> |

F.12h  
 Quando chegou ao local de atendimento de **URGÊNCIA/ EMERGÊNCIA**, quanto tempo esperou para ser atendido por um profissional de saúde?

**19**

|                 |            |
|-----------------|------------|
| Minutos:  __ __ |            |
| Horas:  __ __   |            |
| NS .....        | <b>998</b> |
| NR .....        | <b>999</b> |

**SEÇÃO F : USO E ACESSO A SERVIÇOS**

F.12i

Esse atendimento de **URGÊNCIA/ EMERGÊNCIA** foi feito:

**20**

- Pelo SUS ..... **1**
- Pelo convênio / Plano de Saúde ..... **2**
- Particular ..... **3**
- NS ..... **8**
- NR ..... **9**

F.13\_1

Além das internações e dos atendimentos de urgência /emergência que perguntei, nos últimos 12 meses, realizou alguma consulta médica?

**21**

- Sim ..... **1**
  - Número de vezes: |\_\_|\_\_|
  - Não ..... **2**
  - NS ..... **8**
  - NR ..... **9**
- } Vá para **39**

F.13\_2

O(a) Sr(a) poderia me dizer o **MOTIVO** de sua última **CONSULTA MÉDICA**?

**22**

- Sim ..... **1**
- \_\_\_\_\_
- \_\_\_\_\_
- \_\_\_\_\_
- \_\_\_\_\_
- (especifique)
- Prefere não dizer ..... **2**
- NS ..... **98**
- NR ..... **99**

F.13\_3

Há quanto tempo foi sua última **CONSULTA MÉDICA**?

**23**

- Há menos de 15 dias ..... **1**
- Entre 15 dias até 1 mês ..... **2**
- Entre 1 e 3 meses ..... **3**
- Entre 4 e 6 meses ..... **4**
- Entre 6 meses e 1 ano ..... **5**
- Há mais de 1 ano ..... **6**
- NS ..... **8**
- NR ..... **9**

**SEÇÃO F : USO E ACESSO A SERVIÇOS**

F.14\_1

Onde foi sua última **CONSULTA MÉDICA?**

**24**

- Ambulatório / Clínica de Especialidades ..... **1**
- Consultório Particular ..... **2**
- Unidade Básica de Saúde / Centro de Saúde . **3**
- Centro de Referência do Idoso ..... **4**
- Outro ..... **5**
- (especifique)
- NS ..... **8**
- NR ..... **9**

F.13\_1

Com quem foi sua última **CONSULTA MÉDICA?**

**25**

- Médico Clínico Geral / Médico de Família ..... **1**
- Médico especialista (exceto Geriatra) ..... **2**
- (especifique qual especialista)
- Médico Geriatra ..... **3**
- NS ..... **8**
- NR ..... **9**

F.15

Quanto tempo esperou entre a solicitação da consulta e o atendimento propriamente dito?

**26**

- Dias:   |\_\_|\_\_|
- Meses:  |\_\_|\_\_|
- NS ..... **98**
- NR ..... **99**

F.18

Sua ÚLTIMA CONSULTA MÉDICA foi feita:

**27**

- Pelo SUS ..... **1**
- Pelo convênio / Plano de Saúde ..... **2**
- Particular ..... **3**
- NS ..... **8**
- NR ..... **9**

**SEÇÃO F : USO E ACESSO A SERVIÇOS**

F.19

No total, quanto pagou por essa **ÚLTIMA CONSULTA?**

**28**

Não pagou..... **2**

|\_\_|\_\_|\_\_|\_\_|,|\_\_|\_\_| reais

NS ..... **8**

NR ..... **9**

F.20

Durante essa consulta, foram solicitados radiografias, exames de laboratórios ou outros exames?

**29**

Sim ..... **1**

Não ..... **2**

NS ..... **8**

NR ..... **9**

} Vá para **33**

F.20a

O(A) Sr(A) fez os exames solicitados?

**30**

Sim, fez todos ..... **1**

Não fez todos, mas estão marcados ... **2**

Não fez ou só fez alguns ..... **3**

NS ..... **8**

NR ..... **9**

} Vá para **32**

F.21

Por que não fez TODOS os exames solicitados?

**31**

Por causa dos custos dos exames ..... **1**

Custo do transporte (viagem) ..... **2**

O(s) exame(s) não estava(m) disponível(eis) **10**

Não conseguiu agendar ..... **11**

Não achou necessário ..... **12**

Não tinha companhia para ir ..... **14**

Outro ..... **07**

(especifique)

NS ..... **98**

NR ..... **99**

F.23

Os exames foram feitos:

ASSINALE TODAS AS RESPOSTAS MENCIONADAS

**32**

Pelo SUS ..... **1**

Pelo convênio / Plano de Saúde..... **2**

Particular ..... **3**

NS ..... **8**

NR ..... **9**

**SEÇÃO F : USO E ACESSO A SERVIÇOS**

F.25  
Durante esta consulta, foram prescritos ou receitados medicamentos (remédios)?

**33**

- |           |   |                     |
|-----------|---|---------------------|
| Sim ..... | 1 | } Vá para <b>39</b> |
| Não ..... | 2 |                     |
| NS .....  | 8 |                     |
| NR .....  | 9 |                     |

F.26  
O(A) Sr(a) conseguiu os medicamentos (remédios) que foram prescritos ou receitados?

**34**

- |                              |   |                     |
|------------------------------|---|---------------------|
| Sim .....                    | 1 | Vá para <b>36</b>   |
| Alguns sim, outros não ..... | 2 |                     |
| Não .....                    | 3 |                     |
| NS .....                     | 8 | } Vá para <b>39</b> |
| NR .....                     | 9 |                     |

F.26a  
Por que não obteve TODOS os medicamentos (remédios)?

**35**

- |                                             |           |
|---------------------------------------------|-----------|
| Por causa dos custos dos medicamentos ..... | <b>01</b> |
| Não estava(m) disponível (eis) no SUS ..... | <b>04</b> |
| Não tinha quem fosse buscá-lo(s) .....      | <b>06</b> |
| Não tinha dinheiro para o transporte .....  | <b>07</b> |
| Não tive tempo para buscá-los .....         | <b>10</b> |
| Não achou necessário .....                  | <b>11</b> |
| Outro .....                                 | <b>05</b> |
| (especifique)                               |           |
| NS .....                                    | <b>98</b> |
| NR .....                                    | <b>99</b> |

F.27  
Teve que pagar por esse(s) medicamento(s) prescrito(s) ou receitado(s)?

**36**

- |           |          |                     |
|-----------|----------|---------------------|
| Sim ..... | <b>1</b> | } Vá para <b>39</b> |
| Não ..... | <b>2</b> |                     |
| NS .....  | <b>8</b> |                     |
| NR .....  | <b>9</b> |                     |

F.28  
Quem pagou?

**37**

- |                                    |          |
|------------------------------------|----------|
| O(A) PROPRIO IDOSO (SOZINHO) ..... | <b>1</b> |
| IDOSO + OUTRA PESSOA .....         | <b>2</b> |
| OUTRA PESSOA .....                 | <b>3</b> |
| NS .....                           | <b>8</b> |
| NR .....                           | <b>9</b> |

**SEÇÃO F : USO E ACESSO A SERVIÇOS**

F.29

No total, quanto pagou por esse(s) medicamento(s)?

**38**

|\_\_|\_\_|\_\_|\_\_|,|\_\_|\_\_| reais

NS ..... **8**

NR ..... **9**

F.33

Nos últimos 12 meses, o(a) Sr(a) recebeu algum outro tipo de atendimento em unidade de saúde?

**39**

Sim ..... **1**

Não ..... **2**

NS ..... **8**

NR ..... **9**

Vá para **41**

F.33a

Que profissional o atendeu?

**40**

Médico ..... **1**

Enfermeira / equipe de enfermagem.. **2**

Fisioterapeuta ..... **3**

Dentista ..... **4**

Agente comunitário ..... **5**

Outros ..... **6**

Especifique

NS ..... **8**

NR ..... **9**

F.34

Nos últimos 12 meses, o(a) Sr(a) recebeu algum tipo de atendimento de saúde em casa (atendimento domiciliar ou home care)?

**41**

Sim ..... **1**

Não ..... **2**

NS ..... **8**

NR ..... **9**

Vá para **47**

F.34a

Que profissional o atendeu em sua casa?

**42**

Médico ..... **1**

Enfermeira / equipe de enfermagem.. **2**

Fisioterapeuta ..... **3**

Dentista ..... **4**

Agente comunitário ..... **5**

Outros ..... **6**

Especifique

NS ..... **8**

NR ..... **9**

**SEÇÃO F : USO E ACESSO A SERVIÇOS**

F.34b

Por que recebeu esse tipo de atendimento de saúde em casa (atendimento domiciliar ou home care)?

**43**

- Estava acamado(a) ..... **1**
- Estava com dificuldade para caminhar **2**
- Sua situação de saúde havia piorado .. **3**
- Precisou depois da alta hospitalar ..... **4**
- Outros ..... **5**
- (especifique)
- NS ..... **8**
- NR ..... **9**

F.34c

Esse atendimento de saúde em casa (atendimento domiciliar ou home care) que o(a) Sr(a) recebeu foi?

**44**

- Diário ..... **1**
- Uma vez por semana ..... **2**
- 2 ou mais vezes por semana ..... **3**
- 1 vez a cada 15 dias ..... **4**
- 1 vez ao mês ..... **5**
- Outros ..... **6**
- (especifique)
- NS ..... **8**
- NR ..... **9**

F.34d

Por quanto tempo recebe(u) esse atendimento de saúde em casa (atendimento domiciliar ou home care)?

**45**

- Menos de 15 dias ..... **1**
- Entre 15 dias e 1 mês ..... **2**
- Entre 1 e 3 meses ..... **3**
- Entre 4 e 6 meses ..... **4**
- Entre 6 meses e 1 ano ..... **5**
- Mais de 1 ano ..... **6**
- NS ..... **8**
- NR ..... **9**

F.34e

Quem pagou esse atendimento de saúde em casa (atendimento domiciliar ou home care)?

**46**

- SUS ..... **1**
- O convênio / Plano de Saúde..... **2**
- Particular ..... **3**
- NS ..... **8**
- NR ..... **9**

**SEÇÃO F : USO E ACESSO A SERVIÇOS**

F.32

AS PERGUNTAS DA SEÇÃO F  
FORAM **RESPONDIDAS**

**47**

|                                      |          |
|--------------------------------------|----------|
| PELO(A) PRÓPRIO(A) IDOSO (A) .....   | <b>1</b> |
| IDOSO(A) + INFORMANTE AUXILIAR ..... | <b>2</b> |
| INFORMANTE SUBSTITUTO .....          | <b>3</b> |



**DADOS GERAIS DAS PESSOAS QUE RESIDEM NO MESMO DOMICÍLIO DO(A) IDOSO(A)**

Anote o nome de todas as pessoas que residem na casa **INCLUINDO O IDOSO** (que deve ser colocado em **primeiro lugar**).

| Número de registro | G.1<br>Por favor, começando pelo(a) Sr(a), diga-me o nome de cada uma das pessoas que moram nesta casa. <b>ANOTE OS NOMBRES DE TODOS OS CITADOS COLOCANDO O IDOSO EM PRIMEIRO LUGAR</b><br><b>SE RESIDIR <u>SOZINHO</u> VÁ PARA <u>G18a</u>.</b> | G.4                                                                                                                                                                                                     |                                                                                                                                                                                                                             |            | G.5<br>(NOME) É<br>HOMEM OU<br>MULHER?<br><br>HOMEM... 1<br>MULHER... 2 | G.6<br>QUANTOS ANOS<br>COMPLETOS TEM<br>(NOME)?<br><br>Anote a idade em anos<br>completos.<br>Menos de 1 ano..... 000<br>NS..... 998<br>NR..... 999 |
|--------------------|--------------------------------------------------------------------------------------------------------------------------------------------------------------------------------------------------------------------------------------------------|---------------------------------------------------------------------------------------------------------------------------------------------------------------------------------------------------------|-----------------------------------------------------------------------------------------------------------------------------------------------------------------------------------------------------------------------------|------------|-------------------------------------------------------------------------|-----------------------------------------------------------------------------------------------------------------------------------------------------|
|                    |                                                                                                                                                                                                                                                  | QUAL É O PARENTESCO DE (NOME) COM O(A) SR(A)?<br>Esposo(a) / companheiro(a)..... 01<br>Filho(a)..... 02<br>Pais..... 03<br>Sogros..... 04<br>Irmãos..... 05<br>Genro ou Nora..... 06<br>Neto(a)..... 07 | Enteado(a)..... 08<br>Outro familiar não remunerado..... 09<br>Outro familiar remunerado..... 10<br>Outro não familiar não remunerado.. 11<br>Empregado Doméstico..... 12<br>Cuidador ..... 13<br>NS..... 98<br>NR ..... 99 | PARENTESCO |                                                                         |                                                                                                                                                     |
| 1                  | _____ NOME DA PESSOA IDOSA                                                                                                                                                                                                                       |                                                                                                                                                                                                         |                                                                                                                                                                                                                             |            |                                                                         |                                                                                                                                                     |
| 2                  |                                                                                                                                                                                                                                                  |                                                                                                                                                                                                         |                                                                                                                                                                                                                             |            |                                                                         |                                                                                                                                                     |
| 3                  |                                                                                                                                                                                                                                                  |                                                                                                                                                                                                         |                                                                                                                                                                                                                             |            |                                                                         |                                                                                                                                                     |
| 4                  |                                                                                                                                                                                                                                                  |                                                                                                                                                                                                         |                                                                                                                                                                                                                             |            |                                                                         |                                                                                                                                                     |
| 5                  |                                                                                                                                                                                                                                                  |                                                                                                                                                                                                         |                                                                                                                                                                                                                             |            |                                                                         |                                                                                                                                                     |
| 6                  |                                                                                                                                                                                                                                                  |                                                                                                                                                                                                         |                                                                                                                                                                                                                             |            |                                                                         |                                                                                                                                                     |
| 7                  |                                                                                                                                                                                                                                                  |                                                                                                                                                                                                         |                                                                                                                                                                                                                             |            |                                                                         |                                                                                                                                                     |
| 8                  |                                                                                                                                                                                                                                                  |                                                                                                                                                                                                         |                                                                                                                                                                                                                             |            |                                                                         |                                                                                                                                                     |
| 9                  |                                                                                                                                                                                                                                                  |                                                                                                                                                                                                         |                                                                                                                                                                                                                             |            |                                                                         |                                                                                                                                                     |
| 10                 |                                                                                                                                                                                                                                                  |                                                                                                                                                                                                         |                                                                                                                                                                                                                             |            |                                                                         |                                                                                                                                                     |
| 11                 |                                                                                                                                                                                                                                                  |                                                                                                                                                                                                         |                                                                                                                                                                                                                             |            |                                                                         |                                                                                                                                                     |
| 12                 |                                                                                                                                                                                                                                                  |                                                                                                                                                                                                         |                                                                                                                                                                                                                             |            |                                                                         |                                                                                                                                                     |
| 13                 |                                                                                                                                                                                                                                                  |                                                                                                                                                                                                         |                                                                                                                                                                                                                             |            |                                                                         |                                                                                                                                                     |
| 14                 |                                                                                                                                                                                                                                                  |                                                                                                                                                                                                         |                                                                                                                                                                                                                             |            |                                                                         |                                                                                                                                                     |
| 15                 |                                                                                                                                                                                                                                                  |                                                                                                                                                                                                         |                                                                                                                                                                                                                             |            |                                                                         |                                                                                                                                                     |
| 16                 |                                                                                                                                                                                                                                                  |                                                                                                                                                                                                         |                                                                                                                                                                                                                             |            |                                                                         |                                                                                                                                                     |

**G.2**

Então são |\_\_|\_\_|\_\_|\_\_| pessoas que residem nesta casa? Conferir, se for diferente do citado verifique e corrija a lista.

| G. 13a<br>AGORA DIGA-ME SE (nome) DE ALGUMA FORMA O(A) AJUDA. SE SIM, COM QUE? |                                                       | G. 15a<br>AGORA DIGA-ME SE O(A) SR(A) OFERECE ALGUM TIPO DE AJUDA PARA (nome)? SE SIM, COM QUE? |  |
|--------------------------------------------------------------------------------|-------------------------------------------------------|-------------------------------------------------------------------------------------------------|--|
| Número de registro                                                             | Sim..... 1<br>Não ..... 2<br>NS ..... 8<br>NR ..... 9 | Sim..... 1<br>Não ..... 2<br>NS ..... 8<br>NR ..... 9                                           |  |
|                                                                                | AJUDA RECEBIDA                                        | AJUDA FORNECIDA                                                                                 |  |
| 1                                                                              | IDOSO(A)                                              | IDOSO(A)                                                                                        |  |
| 2                                                                              | _ _ _ _                                               | _ _ _ _                                                                                         |  |
| 3                                                                              | _ _ _ _                                               | _ _ _ _                                                                                         |  |
| 4                                                                              | _ _ _ _                                               | _ _ _ _                                                                                         |  |
| 5                                                                              | _ _ _ _                                               | _ _ _ _                                                                                         |  |
| 6                                                                              | _ _ _ _                                               | _ _ _ _                                                                                         |  |
| 7                                                                              | _ _ _ _                                               | _ _ _ _                                                                                         |  |
| 8                                                                              | _ _ _ _                                               | _ _ _ _                                                                                         |  |
| 9                                                                              | _ _ _ _                                               | _ _ _ _                                                                                         |  |
| 10                                                                             | _ _ _ _                                               | _ _ _ _                                                                                         |  |
| 11                                                                             | _ _ _ _                                               | _ _ _ _                                                                                         |  |
| 12                                                                             | _ _ _ _                                               | _ _ _ _                                                                                         |  |
| 13                                                                             | _ _ _ _                                               | _ _ _ _                                                                                         |  |
| 14                                                                             | _ _ _ _                                               | _ _ _ _                                                                                         |  |
| 15                                                                             | _ _ _ _                                               | _ _ _ _                                                                                         |  |
| 16                                                                             | _ _ _ _                                               | _ _ _ _                                                                                         |  |

**FILHOS QUE NÃO MORAM NA CASA (incluir filhos adotivos e enteados)**

| Número de registro | G.18a                                                                                                                                                                                                                                                                                               | G.19                                                                                                                            | G.20                                                                         | G.21                                                                                                             | G.28a                                                                                                                                                         | G.30b                                                                                                                                                            |
|--------------------|-----------------------------------------------------------------------------------------------------------------------------------------------------------------------------------------------------------------------------------------------------------------------------------------------------|---------------------------------------------------------------------------------------------------------------------------------|------------------------------------------------------------------------------|------------------------------------------------------------------------------------------------------------------|---------------------------------------------------------------------------------------------------------------------------------------------------------------|------------------------------------------------------------------------------------------------------------------------------------------------------------------|
|                    | Agora quero perguntar sobre os seus filhos que <b>NÃO MORAM COM O(A) SR(A)</b> nesta casa. Poderia, por favor, me dizer o nome deles.<br>Nº de filhos fora da casa .....  __ __ __ <br>Não tem filhos fora da casa ..... <b>00</b><br><b>Vá para G32</b><br>NS..... <b>98</b><br>NR ..... <b>99</b> | (Nome) <b>É SEU FILHO:</b><br>Próprio <b>1</b><br>Enteado <b>2</b><br>Adotivo <b>3</b><br>NS..... <b>8</b><br>NR ..... <b>9</b> | (Nome) <b>É HOMEM OU MULHER?</b><br>HOMEM... <b>1</b><br>MULHER ... <b>2</b> | <b>QUANTOS ANOS COMPLETOS TEM (nome)?</b><br>< de 1 ano..... <b>00</b><br>NS..... <b>98</b><br>NR..... <b>99</b> | <b>AGORA DIGA-ME SE (nome) DE ALGUMA FORMA O AJUDA. SE SIM, COM QUE?</b><br>Sim..... <b>1</b><br>Não ..... <b>2</b><br>NS ..... <b>8</b><br>NR ..... <b>9</b> | <b>AGORA DIGA-ME SE O(A) SR(A) OFERECE ALGUM TIPO DE AJUDA PARA (nome)?</b><br>Sim..... <b>1</b><br>Não ..... <b>2</b><br>NS ..... <b>8</b><br>NR ..... <b>9</b> |
|                    | Lista de nomes                                                                                                                                                                                                                                                                                      | Parentesco                                                                                                                      | Sexo                                                                         | Idade                                                                                                            | AJUDA RECEBIDA                                                                                                                                                | AJUDA FORNECIDA                                                                                                                                                  |
| 1                  |                                                                                                                                                                                                                                                                                                     | __                                                                                                                              | __                                                                           | __                                                                                                               | __                                                                                                                                                            | __                                                                                                                                                               |
| 2                  |                                                                                                                                                                                                                                                                                                     | __                                                                                                                              | __                                                                           | __                                                                                                               | __                                                                                                                                                            | __                                                                                                                                                               |
| 3                  |                                                                                                                                                                                                                                                                                                     | __                                                                                                                              | __                                                                           | __                                                                                                               | __                                                                                                                                                            | __                                                                                                                                                               |
| 4                  |                                                                                                                                                                                                                                                                                                     | __                                                                                                                              | __                                                                           | __                                                                                                               | __                                                                                                                                                            | __                                                                                                                                                               |
| 5                  |                                                                                                                                                                                                                                                                                                     | __                                                                                                                              | __                                                                           | __                                                                                                               | __                                                                                                                                                            | __                                                                                                                                                               |
| 6                  |                                                                                                                                                                                                                                                                                                     | __                                                                                                                              | __                                                                           | __                                                                                                               | __                                                                                                                                                            | __                                                                                                                                                               |
| 7                  |                                                                                                                                                                                                                                                                                                     | __                                                                                                                              | __                                                                           | __                                                                                                               | __                                                                                                                                                            | __                                                                                                                                                               |
| 8                  |                                                                                                                                                                                                                                                                                                     | __                                                                                                                              | __                                                                           | __                                                                                                               | __                                                                                                                                                            | __                                                                                                                                                               |
| 9                  |                                                                                                                                                                                                                                                                                                     | __                                                                                                                              | __                                                                           | __                                                                                                               | __                                                                                                                                                            | __                                                                                                                                                               |
| 10                 |                                                                                                                                                                                                                                                                                                     | __                                                                                                                              | __                                                                           | __                                                                                                               | __                                                                                                                                                            | __                                                                                                                                                               |

IRMÃOS E IRMÃS

| Número de registro | G.32                                                                                                                                                                                                                                                                                                                               | G.33                                                                         | G.34                                                                                  | G.40a                                                                                                                                                         | G.42a                                                                                                                                                            |                                     |
|--------------------|------------------------------------------------------------------------------------------------------------------------------------------------------------------------------------------------------------------------------------------------------------------------------------------------------------------------------------|------------------------------------------------------------------------------|---------------------------------------------------------------------------------------|---------------------------------------------------------------------------------------------------------------------------------------------------------------|------------------------------------------------------------------------------------------------------------------------------------------------------------------|-------------------------------------|
|                    | Agora quero perguntar sobre seus irmãos e irmãs que <b>NÃO MORAM COM O(A) SR(A)</b> nessa casa. Poderia, por favor, me dizer o nome deles.<br>Nº de irmãos vivos fora da casa.. _ _ _ _ <br>Não tem irmãos fora da casa ..... <b>00</b><br><b>Vá para G44a</b><br>NS..... <b>98</b><br>NR ..... <b>99</b><br><b>Lista de nomes</b> | (Nome) <b>É HOMEM OU MULHER?</b><br>HOMEM... <b>1</b><br>MULHER ... <b>2</b> | <b>QUANTOS ANOS COMPLETOS TEM (nome)?</b><br>NS..... <b>998</b><br>NR..... <b>999</b> | <b>AGORA DIGA-ME SE (nome) DE ALGUMA FORMA O AJUDA. SE SIM, COM QUE?</b><br>Sim..... <b>1</b><br>Não ..... <b>2</b><br>NS ..... <b>8</b><br>NR ..... <b>9</b> | <b>AGORA DIGA-ME SE O(A) SR(A) OFERECE ALGUM TIPO DE AJUDA PARA (nome)?</b><br>Sim..... <b>1</b><br>Não ..... <b>2</b><br>NS ..... <b>8</b><br>NR ..... <b>9</b> | <b>AJUDA RECEBIDA (especifique)</b> |
| 1                  |                                                                                                                                                                                                                                                                                                                                    | <input type="checkbox"/>                                                     | _   _ _                                                                               | _                                                                                                                                                             | _                                                                                                                                                                | _                                   |
| 2                  |                                                                                                                                                                                                                                                                                                                                    | <input type="checkbox"/>                                                     | _   _ _                                                                               | _                                                                                                                                                             | _                                                                                                                                                                | _                                   |
| 3                  |                                                                                                                                                                                                                                                                                                                                    | <input type="checkbox"/>                                                     | _   _ _                                                                               | _                                                                                                                                                             | _                                                                                                                                                                | _                                   |
| 4                  |                                                                                                                                                                                                                                                                                                                                    | <input type="checkbox"/>                                                     | _   _ _                                                                               | _                                                                                                                                                             | _                                                                                                                                                                | _                                   |
| 5                  |                                                                                                                                                                                                                                                                                                                                    | <input type="checkbox"/>                                                     | _   _ _                                                                               | _                                                                                                                                                             | _                                                                                                                                                                | _                                   |
| 6                  |                                                                                                                                                                                                                                                                                                                                    | <input type="checkbox"/>                                                     | _   _ _                                                                               | _                                                                                                                                                             | _                                                                                                                                                                | _                                   |
| 7                  |                                                                                                                                                                                                                                                                                                                                    | <input type="checkbox"/>                                                     | _   _ _                                                                               | _                                                                                                                                                             | _                                                                                                                                                                | _                                   |
| 8                  |                                                                                                                                                                                                                                                                                                                                    | <input type="checkbox"/>                                                     | _   _ _                                                                               | _                                                                                                                                                             | _                                                                                                                                                                | _                                   |
| 9                  |                                                                                                                                                                                                                                                                                                                                    | <input type="checkbox"/>                                                     | _   _ _                                                                               | _                                                                                                                                                             | _                                                                                                                                                                | _                                   |
| 10                 |                                                                                                                                                                                                                                                                                                                                    | <input type="checkbox"/>                                                     | _   _ _                                                                               | _                                                                                                                                                             | _                                                                                                                                                                | _                                   |



**G.51 - APGAR DE FAMÍLIA (APLICAR SOMENTE COM O(A) IDOSO(A))**

AS SEGUINTES PERGUNTAS FORAM ELABORADAS PARA NOS AJUDAR A COMPREENDER O(A) SR(A) E SUA FAMÍLIA. SINTA-SE À VONTADE PARA FAZER PERGUNTAS SOBRE QUALQUER ITEM DO QUESTIONÁRIO.

“FAMÍLIA” É (SÃO) A(S) PESSOA(S) COM A(S) QUAL(AIS) HABITUALMENTE SE VIVE. CASO O(A) IDOSO(A) MORE SOZINHO(A), CONSIDERE FAMÍLIA AQUELAS PESSOAS COM AS QUAIS ELE(A) TEM LAÇOS EMOCIONAIS MAIS FORTES. (PARA O IDOSO)

|              | SEMPRE                                                                                                                                                        | QUASE SEMPRE | ALGUMAS VEZES | RARAMENTE | NUNCA | NR |   |
|--------------|---------------------------------------------------------------------------------------------------------------------------------------------------------------|--------------|---------------|-----------|-------|----|---|
| <b>G.51b</b> | Estou satisfeito(a) pois posso recorrer à minha família em busca de ajuda quando alguma coisa está me incomodando ou preocupando.                             | 4            | 3             | 2         | 1     | 0  | 9 |
| <b>G.51c</b> | Estou satisfeito(a) com a maneira pela qual minha família e eu conversamos e compartilhamos os problemas.                                                     | 4            | 3             | 2         | 1     | 0  | 9 |
| <b>G.51d</b> | Estou satisfeito(a) com a maneira como minha família aceita e apóia meus desejos de iniciar ou buscar novas atividades e procurar novos caminhos ou direções. | 4            | 3             | 2         | 1     | 0  | 9 |
| <b>G.51e</b> | Estou satisfeito(a) com a maneira pela qual minha família demonstra afeição e reage às minhas emoções, tais como raiva, mágoa ou amor.                        | 4            | 3             | 2         | 1     | 0  | 9 |
| <b>G.51f</b> | Estou satisfeito(a) com a maneira pela qual minha família e eu compartilhamos o tempo juntos.                                                                 | 4            | 3             | 2         | 1     | 0  | 9 |

**PARTICIPAÇÃO COMUNITÁRIA E TRANSFERÊNCIAS**

| G. 52                                                                                                                                                                                                                                            |   | G. 53                                                                                |                             | G.54a                                                                                                               |   |
|--------------------------------------------------------------------------------------------------------------------------------------------------------------------------------------------------------------------------------------------------|---|--------------------------------------------------------------------------------------|-----------------------------|---------------------------------------------------------------------------------------------------------------------|---|
| Nos últimos 12 meses (último ano) o(a) Sr(a) RECEBEU assistência ou ajuda de algum tipo de instituição ou organização de sua comunidade? Se sim, anote todos os códigos correspondentes. UTILIZE UMA LINHA PARA CADA INSTITUIÇÃO OU ORGANIZAÇÃO. |   | QUE TIPO DE AJUDA O(A) SR(A) RECEBEU?<br>RELACIONE A AJUDA COM A INSTITUIÇÃO CITADA. |                             | QUAL A FREQUÊNCIA COM QUE O(A) SR(A) RECEBEU ESSA AJUDA?<br>CADA QUADRADINHO CORRESPONDE A UMA AJUDA CITADA EM G.53 |   |
| Número de registro                                                                                                                                                                                                                               |   | SIM                                                                                  |                             | DIÁRIA                                                                                                              |   |
| 01                                                                                                                                                                                                                                               |   | 01                                                                                   |                             | 1                                                                                                                   |   |
| 02                                                                                                                                                                                                                                               |   | 02                                                                                   |                             | 2                                                                                                                   |   |
| 08                                                                                                                                                                                                                                               |   | 03                                                                                   |                             | 3                                                                                                                   |   |
| 04                                                                                                                                                                                                                                               |   | 04                                                                                   |                             | 4                                                                                                                   |   |
| 07                                                                                                                                                                                                                                               |   | 05                                                                                   |                             | 5                                                                                                                   |   |
| 05                                                                                                                                                                                                                                               |   | 06                                                                                   |                             | 6                                                                                                                   |   |
| 06                                                                                                                                                                                                                                               |   | 07                                                                                   |                             | 7                                                                                                                   |   |
| 98                                                                                                                                                                                                                                               |   | 08                                                                                   |                             | 8                                                                                                                   |   |
| 99                                                                                                                                                                                                                                               |   | 98                                                                                   |                             | 9                                                                                                                   |   |
|                                                                                                                                                                                                                                                  |   | 99                                                                                   |                             |                                                                                                                     |   |
| AJUDA RECEBIDA                                                                                                                                                                                                                                   |   | TIPO DE AJUDA                                                                        |                             | FREQUENCIA DE RECEBIMENTO DA AJUDA                                                                                  |   |
| 0                                                                                                                                                                                                                                                |   | EXEMPLO:<br>1   RECEBE AJUDA DO SERVIÇO SOCIAL                                       |                             | 1 2   1 4   1 2  <br>SEMANAL MENSAL SEMANAL                                                                         |   |
| 1                                                                                                                                                                                                                                                | _ | _                                                                                    | _                           | _                                                                                                                   | _ |
| 2                                                                                                                                                                                                                                                | _ | _                                                                                    | _                           | _                                                                                                                   | _ |
| 3                                                                                                                                                                                                                                                | _ | _                                                                                    | _                           | _                                                                                                                   | _ |
| 4                                                                                                                                                                                                                                                | _ | _                                                                                    | _                           | _                                                                                                                   | _ |
| 5                                                                                                                                                                                                                                                | _ | _                                                                                    | _                           | _                                                                                                                   | _ |
| 6                                                                                                                                                                                                                                                | _ | _                                                                                    | _                           | _                                                                                                                   | _ |
| 7                                                                                                                                                                                                                                                | _ | _                                                                                    | _                           | _                                                                                                                   | _ |
| 8                                                                                                                                                                                                                                                | _ | _                                                                                    | _                           | _                                                                                                                   | _ |
| 9                                                                                                                                                                                                                                                | _ | _                                                                                    | _                           | _                                                                                                                   | _ |
| 10                                                                                                                                                                                                                                               | _ | _                                                                                    | _                           | _                                                                                                                   | _ |
|                                                                                                                                                                                                                                                  |   | 01                                                                                   | DINHEIRO                    | 01                                                                                                                  |   |
|                                                                                                                                                                                                                                                  |   | 02                                                                                   | COMIDA                      | 02                                                                                                                  |   |
|                                                                                                                                                                                                                                                  |   | 03                                                                                   | AJUDA EM TAREFAS DOMÉSTICAS | 03                                                                                                                  |   |
|                                                                                                                                                                                                                                                  |   | 04                                                                                   | AJUDA NO CUIDADO PESSOAL    | 04                                                                                                                  |   |
|                                                                                                                                                                                                                                                  |   | 05                                                                                   | TRANSPORTE                  | 05                                                                                                                  |   |
|                                                                                                                                                                                                                                                  |   | 06                                                                                   | LAZER/DIVERSÃO              | 06                                                                                                                  |   |
|                                                                                                                                                                                                                                                  |   | 07                                                                                   | COMPANHIA                   | 07                                                                                                                  |   |
|                                                                                                                                                                                                                                                  |   | 08                                                                                   | Outro (especifique)         | 08                                                                                                                  |   |
|                                                                                                                                                                                                                                                  |   | 98                                                                                   | NS                          | 98                                                                                                                  |   |
|                                                                                                                                                                                                                                                  |   | 99                                                                                   | NR                          | 99                                                                                                                  |   |
|                                                                                                                                                                                                                                                  |   |                                                                                      | 01                          | COMIDA                                                                                                              |   |
|                                                                                                                                                                                                                                                  |   |                                                                                      | 02                          | TRANSPORTE                                                                                                          |   |
|                                                                                                                                                                                                                                                  |   |                                                                                      | 03                          | ROUPA                                                                                                               |   |
|                                                                                                                                                                                                                                                  |   |                                                                                      | 04                          | TRANSPORTE                                                                                                          |   |
|                                                                                                                                                                                                                                                  |   |                                                                                      | 05                          | TRANSPORTE                                                                                                          |   |
|                                                                                                                                                                                                                                                  |   |                                                                                      | 06                          | TRANSPORTE                                                                                                          |   |
|                                                                                                                                                                                                                                                  |   |                                                                                      | 07                          | TRANSPORTE                                                                                                          |   |
|                                                                                                                                                                                                                                                  |   |                                                                                      | 08                          | TRANSPORTE                                                                                                          |   |
|                                                                                                                                                                                                                                                  |   |                                                                                      | 98                          | TRANSPORTE                                                                                                          |   |
|                                                                                                                                                                                                                                                  |   |                                                                                      | 99                          | TRANSPORTE                                                                                                          |   |

**PARTICIPAÇÃO COMUNITÁRIA E TRANSFERÊNCIAS**

| G. 55 - Nos últimos 12 meses (último ano) o(a) Sr(a) prestou algum serviço de forma voluntária ou gratuita para algum tipo de instituição ou organização de sua comunidade?<br>UTILIZE UMA LINHA PARA CADA INSTITUIÇÃO OU ORGANIZAÇÃO. |                                                    | G. 56<br>QUE TIPO DE AJUDA O(A) SR(A) FORNECE ÀS ORGANIZAÇÕES OU INSTITUIÇÕES DE SUA COMUNIDADE?<br>RELACIONE A AJUDA COM A INSTITUIÇÃO CITADA. |                  | G.57a<br>QUAL A FREQUÊNCIA COM QUE O(A) SR(A) OFERECE ESSA AJUDA?<br>CADA QUADRADINHO CORRESPONDE A UMA AJUDA CITADA EM G.56 |                 |               |
|----------------------------------------------------------------------------------------------------------------------------------------------------------------------------------------------------------------------------------------|----------------------------------------------------|-------------------------------------------------------------------------------------------------------------------------------------------------|------------------|------------------------------------------------------------------------------------------------------------------------------|-----------------|---------------|
| Número de registro                                                                                                                                                                                                                     |                                                    | TIPO DE AJUDA                                                                                                                                   |                  | FREQUENCIA DE RECEBIMENTO DA AJUDA                                                                                           |                 |               |
| AJUDA PRESTADA                                                                                                                                                                                                                         |                                                    | 10 19  LAZER                                                                                                                                    | 11 10  COMPANHIA | 10 18  ORAÇÃO                                                                                                                | 1 5   SEMESTRAL | 1 2   SEMANAL |
| EXEMPLO:<br>10   PRESTOU SERVIÇO NA PASTORAL DO IDOSO                                                                                                                                                                                  |                                                    | _ _ _ _                                                                                                                                         | _ _ _ _          | _ _ _ _                                                                                                                      | _ _ _ _         | _ _ _ _       |
| 1                                                                                                                                                                                                                                      | _ _ _ _                                            | _ _ _ _                                                                                                                                         | _ _ _ _          | _ _ _ _                                                                                                                      | _ _ _ _         | _ _ _ _       |
| 2                                                                                                                                                                                                                                      | _ _ _ _                                            | _ _ _ _                                                                                                                                         | _ _ _ _          | _ _ _ _                                                                                                                      | _ _ _ _         | _ _ _ _       |
| 3                                                                                                                                                                                                                                      | _ _ _ _                                            | _ _ _ _                                                                                                                                         | _ _ _ _          | _ _ _ _                                                                                                                      | _ _ _ _         | _ _ _ _       |
| 4                                                                                                                                                                                                                                      | _ _ _ _                                            | _ _ _ _                                                                                                                                         | _ _ _ _          | _ _ _ _                                                                                                                      | _ _ _ _         | _ _ _ _       |
| 5                                                                                                                                                                                                                                      | _ _ _ _                                            | _ _ _ _                                                                                                                                         | _ _ _ _          | _ _ _ _                                                                                                                      | _ _ _ _         | _ _ _ _       |
| 6                                                                                                                                                                                                                                      | _ _ _ _                                            | _ _ _ _                                                                                                                                         | _ _ _ _          | _ _ _ _                                                                                                                      | _ _ _ _         | _ _ _ _       |
| 7                                                                                                                                                                                                                                      | _ _ _ _                                            | _ _ _ _                                                                                                                                         | _ _ _ _          | _ _ _ _                                                                                                                      | _ _ _ _         | _ _ _ _       |
| 8                                                                                                                                                                                                                                      | _ _ _ _                                            | _ _ _ _                                                                                                                                         | _ _ _ _          | _ _ _ _                                                                                                                      | _ _ _ _         | _ _ _ _       |
| 9                                                                                                                                                                                                                                      | _ _ _ _                                            | _ _ _ _                                                                                                                                         | _ _ _ _          | _ _ _ _                                                                                                                      | _ _ _ _         | _ _ _ _       |
| 10                                                                                                                                                                                                                                     | _ _ _ _                                            | _ _ _ _                                                                                                                                         | _ _ _ _          | _ _ _ _                                                                                                                      | _ _ _ _         | _ _ _ _       |
|                                                                                                                                                                                                                                        | SIM                                                | DINHEIRO.....                                                                                                                                   | 01               | DIÁRIA.....                                                                                                                  | 1               |               |
|                                                                                                                                                                                                                                        | Serviço Social.....                                | COMIDA.....                                                                                                                                     | 02               | SEMANAL.....                                                                                                                 | 2               |               |
|                                                                                                                                                                                                                                        | Centro de convivência de idosos.....               | ROUPA.....                                                                                                                                      | 03               | QUINZENAL.....                                                                                                               | 3               |               |
|                                                                                                                                                                                                                                        | Creche ou centro infantil.....                     | AJUDA COM ENSINO.....                                                                                                                           | 06               | MENSAL.....                                                                                                                  | 4               |               |
|                                                                                                                                                                                                                                        | Colégio ou Universidade.....                       | AJUDA NAS OFICINAS.....                                                                                                                         | 07               | SEMESTRAL.....                                                                                                               | 5               |               |
|                                                                                                                                                                                                                                        | Posto de Saúde.....                                | LAZER/DIVERSÃO.....                                                                                                                             | 09               | ANUAL.....                                                                                                                   | 6               |               |
|                                                                                                                                                                                                                                        | Igreja, templo ou outra instituição religiosa..... | COMPANHIA.....                                                                                                                                  | 10               | ESPORÁDICA.....                                                                                                              | 7               |               |
|                                                                                                                                                                                                                                        | Hospital.....                                      | OUTRO (especifique).....                                                                                                                        | 08               | NS.....                                                                                                                      | 8               |               |
|                                                                                                                                                                                                                                        | Pastoral da saúde ou do idoso.....                 | NS.....                                                                                                                                         | 98               | NR.....                                                                                                                      | 9               |               |
|                                                                                                                                                                                                                                        | Outro (especifique).....                           | NR.....                                                                                                                                         | 99               |                                                                                                                              |                 |               |
|                                                                                                                                                                                                                                        | NÃO (vá para Seção H).....                         |                                                                                                                                                 |                  |                                                                                                                              |                 |               |
|                                                                                                                                                                                                                                        | NS.....                                            |                                                                                                                                                 |                  |                                                                                                                              |                 |               |
|                                                                                                                                                                                                                                        | NR.....                                            |                                                                                                                                                 |                  |                                                                                                                              |                 |               |



**SEÇÃO H - HISTÓRIA DE TRABALHO E FONTES DE RECEITA**

H.1a

**Alguma vez, na sua vida, o(a) Sr.(a) teve algum trabalho, pelo qual recebeu um pagamento em dinheiro ou em espécie ou ajudou em um estabelecimento familiar, sem receber qualquer tipo de pagamento?**

**H. 1**

- SIM, trabalhei **COM** pagamento em dinheiro ou espécie ..... 1
- SIM, trabalhei **SEM** receber pagamento ..... 2  
*(Ex.: estabelecimento familiar)*
- NÃO, nunca trabalhei ..... 3
- NS ..... 8
- NR ..... 9

VÁ PARA  
**H. 3**

H.12

**Com relação ao seu trabalho principal, o Sr.(a) é ou era...?**

LEIA AS OPÇÕES ATÉ OBTER UMA RESPOSTA AFIRMATIVA

**H. 2**

- OPERÁRIO OU EMPREGADO NÃO AGROPÉCUÁRIO? ..... 01
- DIARISTA RURAL OU PEÃO DO CAMPO? ..... 02
- PATRÃO, EMPREGADOR OU PROPRIETÁRIO (C/ 1 A 5 EMPREGADOS)? ..... 03
- PATRÃO, EMPREGADOR OU PROPRIETÁRIO (C/6 OU MAIS EMPREGADOS)? ..... 04
- TRABALHADOR POR CONTA PRÓPRIA? ..... 05
- TRABALHADOR FAMILIAR, SEM PAGAMENTO? ..... 06
- TRABALHADOR NÃO FAMILIAR, SEM PAGAMENTO? ..... 07
- TRABALHADOR POR EMPREITADA? ..... 08
- OUTRO ..... 09  
*Especifique*
- NS ..... 98
- NR ..... 99

VÁ PARA  
**H. 4**

H.3

**Qual a principal razão pela qual o(a) sr.(a) nunca trabalhou?**

ANOTE SOMENTE UMA RESPOSTA

**H. 3**

- PROBLEMA DE SAÚDE ..... 1
- NÃO TINHA NECESSIDADE ECONÔMICA ..... 2
- DEDICOU-SE A CUIDAR DA FAMÍLIA ..... 3
- CASOU-SE MUITO JOVEM ..... 4
- NÃO HAVIA OPORTUNIDADE DE TRABALHO ..... 5
- OS PAIS NÃO DEIXARAM ..... 6
- OUTRO ..... 7  
*Especifique*
- NS ..... 8
- NR ..... 9

VÁ PARA  
**H.10**

H.4

**Que idade o(a) Sr(a) tinha quando começou a trabalhar?**

**H. 4**

- ANOS ..... | | | | anos
- NS ..... 98
- NR ..... 99

**SEÇÃO H - HISTÓRIA DE TRABALHO E FONTES DE RECEITA**

H.5a

Atualmente o(a) Sr(a) trabalha?

**H. 5**

TRABALHA ..... 1

NÃO TRABALHA ..... 2 → **VÁ PARA H. 8**

H.5b

**Tipo de trabalho atual:**

ANOTE TODAS AS RESPOSTAS DO(A) IDOSO(A)

**H. 6**

TRABALHO VOLUNTÁRIO (SEM REMUNERAÇÃO) ..... 1

TRABALHO ESPORÁDICO (BICO) ..... 2

TRABALHO REGULAR ..... 3

NR ..... 9

H. 22

**Qual é a principal razão pela qual o(a) Sr.(a) trabalha?**

ANOTE SOMENTE UMA RESPOSTA (A MAIS IMPORTANTE)

**H. 7**

NECESSITA DO DINHEIRO ..... 1

NECESSITA OU QUER AJUDAR A FAMÍLIA ..... 2

QUER MANTER-SE OCUPADO ..... 3

NECESSIDADE DE SENTIR-SE ÚTIL, PRODUTIVO ..... 4

GOSTA DO SEU TRABALHO ..... 5

OUTRO ..... 6  
*(Especifique)*

AINDA NÃO COMPLETEI TEMPO/IDADE PARA ME APOSENTAR.. 7

NS ..... 8

NR ..... 9

**VÁ PARA H. 10**

H.8

**Qual a principal razão pela qual o(a) Sr.(a) não trabalha atualmente?**

ANOTE SOMENTE UMA RESPOSTA

**H. 8**

NÃO CONSEGUE TRABALHO ..... 1

PROBLEMAS DE SAÚDE ..... 2

APOSENTADO ..... 3

FOI COLOCADO À DISPOSIÇÃO ..... 4

A FAMÍLIA NÃO QUER QUE TRABALHE ..... 5

OUTRO ..... 6  
*Especifique*

NS ..... 8

NR ..... 9

H.7

**Com que idade deixou de trabalhar?**

**H. 9**

ANOS ..... |\_\_|\_\_| anos

NS ..... 98

NR ..... 99

**SEÇÃO H - HISTÓRIA DE TRABALHO E FONTES DE RECEITA**

H.27c

**O(a) Sr(a) recebe algum tipo de alguma receita (dinheiro) próprio?**

**H. 10**

- SIM ..... 1
- NÃO ..... 2
- NS ..... 8
- NR ..... 9

VÁ PARA  
**H.15**

H.26a

Que tipo de receita (dinheiro) o(a) Sr(a) recebe?

ANOTAR ATÉ 2 RESPOSTAS.

**H. 11**

- APOSENTADORIA POR TEMPO DE SERVIÇO ..... 01
- APOSENTADORIA POR DOENÇA OU INVALIDEZ ..... 02
- PENSÃO (do cônjuge, dos filhos, dos pais, etc) ..... 03
- BENEFÍCIO DE PRESTAÇÃO CONTINUADA (BPC) ..... 04
- FUNRURAL ..... 05
- ALUGUEL OU APLICAÇÕES BANCÁRIAS ..... 06
- SALÁRIO ..... 08
- OUTRO ..... 07  
(ESPECIFIQUE)
- NS ..... 88
- NR ..... 89

H.26a1

**O(a) Sr(a) recebe 13º salário?**

**H. 12**

- SIM ..... 1
- NÃO ..... 2
- NS ..... 8
- NR ..... 9

H.26c

No total, aproximadamente, quanto o(a) Sr(a) recebe por mês?

Referência: 1 salário mínimo = R\$ 622,00

ANOTAR ATÉ 2 RESPOSTAS.

**H. 13**

- VALOR:
- MENOS DE UM SALÁRIO MÍNIMO ..... 1
  - UM SALÁRIO MÍNIMO ..... 2
  - ATÉ DOIS SALÁRIOS MÍNIMOS ..... 3
  - DE DOIS A QUATRO SALÁRIOS MÍNIMOS ..... 4
  - DE QUATRO A DEZ SALÁRIOS MÍNIMOS ..... 5
  - DE DEZ A VINTE SALÁRIOS MÍNIMOS ..... 6
  - VINTE SALÁRIOS MÍNIMOS E MAIS ..... 7
  - NS ..... 8
  - NR ..... 9

H.28

**Quantas pessoas dependem dos seus ganhos?**

**INCLUA O ENTREVISTADO NO TOTAL DE PESSOAS QUE DEPENDEM DESTES GANHOS.**

**H. 14**

- SÓ O(a) ENTREVISTADO(a) ..... 01
- NÚMERO DE PESSOAS .....     
some o(a) idoso(a) às pessoas citadas
- NS ..... 98
- NR ..... 99

SEÇÃO H - HISTÓRIA DE TRABALHO E FONTES DE RECEITA

| Em relação a algumas despesas do dia-a-dia, gostaria que o(a) Sr(a) me dissesse como as paga: | O SR. PAGA  |               | OUTRA PESSOA responsável pelo pagto. | NÃO PAGA (nem o(a) idoso(a) nem outras pessoas) | NR | NR  |
|-----------------------------------------------------------------------------------------------|-------------|---------------|--------------------------------------|-------------------------------------------------|----|-----|
|                                                                                               | Sim, todo   | Sim, em parte |                                      |                                                 |    |     |
| H.29a<br>Casa (luz, gás, telefone, água, IPTU, aluguel, etc.)                                 | <b>H.15</b> | 1             | 2                                    | 3                                               | 4  | 8 9 |
| H.29h<br>Comida, roupas, material de limpeza, etc                                             | <b>H.16</b> | 1             | 2                                    | 3                                               | 4  | 8 9 |
| H.29d<br>Medicamentos, despesas com médicos, etc.                                             | <b>H.17</b> | 1             | 2                                    | 3                                               | 4  | 8 9 |
| H.29f<br>Outros _____<br>_____<br>_____                                                       |             | 1             | 2                                    | 3                                               | 4  | 8 9 |
| <i>Especifique</i>                                                                            | <b>H.18</b> |               |                                      |                                                 |    |     |

H.30  
O(a) Sr(a) considera que tem dinheiro suficiente para cobrir suas despesas diárias?

**H. 19**

SIM..... 1  
NÃO ..... 2  
NS ..... 8  
NR ..... 9

As perguntas H20 e H21 são para o(a)s idoso(a)s que trabalharam/trabalham. Se ele(a) **NUNCA** trabalhou, vá para a **SEÇÃO J**.

H.19  
Alguma vez um médico ou enfermeira lhe disse que o(a) Sr(a) tinha ou tem um problema de saúde provocado pelo trabalho ou ocupação que exerceu em sua vida?

**H. 20**

SIM..... 1  
NÃO ..... 2  
NS ..... 8  
NR ..... 9

VÁ PARA **J.01a**

H.20  
Que tipo de problema é este?

**H. 21**

Textual \_\_\_\_\_ | | | |

\_\_\_\_\_

\_\_\_\_\_

NS ..... 98  
NR ..... 99

## SEÇÃO J- CARACTERÍSTICAS DA MORADIA

J. 1a  
A CASA ONDE O(A) IDOSO(A) MORA É:

**J01**

|                  |   |
|------------------|---|
| TÉRREA .....     | 4 |
| SOBRADO .....    | 6 |
| APARTAMENTO..... | 2 |
| BARRACO .....    | 3 |
| OUTRO .....      | 5 |
| (especifique)    |   |

J.2  
A RESIDENCIA ONDE O(A) IDOSO(A) MORA É:

**J02**

|                                            |   |
|--------------------------------------------|---|
| PRÓPRIA, QUITADA, EM TERRENO PRÓPRIO.....  | 1 |
| AINDA ESTÁ PAGANDO .....                   | 2 |
| PRÓPRIA EM TERRENO QUE NÃO É PRÓPRIO ..... | 3 |
| ARRENDADA OU ALUGADA .....                 | 4 |
| EMPRESTADA OU CEDIDA .....                 | 5 |
| OUTRO .....                                | 6 |
| (especifique)                              |   |
| NS .....                                   | 8 |
| NR .....                                   | 9 |

A CASA ONDE O(A) IDOSO(A) MORA TEM:

J.3a LUZ ELÉTRICA **J03**

J.4a ÁGUA ENCANADA **J04**

J.5a SISTEMA DE DRENAGEM DE ESGOTO **J05**

J.8 CÔMODO PRÓPRIO PARA COZINHAR **J06**

| SIM      | NÃO      | NR       |
|----------|----------|----------|
| <b>1</b> | <b>2</b> | <b>9</b> |
| <b>1</b> | <b>2</b> | <b>9</b> |
| <b>1</b> | <b>2</b> | <b>9</b> |
| <b>1</b> | <b>2</b> | <b>9</b> |

J.7 NÚMERO DE QUARTOS **J07**

|       |   |
|-------|---|
| __ __ | 9 |
|-------|---|

### J13. NESTA CASA HÁ:

| POSSE DE ITENS <span style="float: right;"><b>J08</b></span> | NÃO TEM                               | TEM (Quantidade) |      |      |        |
|--------------------------------------------------------------|---------------------------------------|------------------|------|------|--------|
|                                                              |                                       | UM               | DOIS | TRÊS | QUATRO |
| Televisores em cores                                         | 0                                     | 1                | 2    | 3    | 4      |
| Videocassete /DVD                                            | 0                                     | 2                | 2    | 2    | 2      |
| Rádios                                                       | 0                                     | 1                | 2    | 3    | 4      |
| Banheiros                                                    | 0                                     | 4                | 5    | 6    | 7      |
| Automóveis                                                   | 0                                     | 4                | 7    | 9    | 9      |
| Empregadas mensalistas                                       | 0                                     | 3                | 4    | 4    | 4      |
| Máquinas de lavar                                            | 0                                     | 2                | 2    | 2    | 2      |
| Geladeira                                                    | 0                                     | 4                | 4    | 4    | 4      |
| Freezer (*)                                                  | 0                                     | 2                | 2    | 2    | 2      |
| <b>TOTAL DE PONTOS</b>                                       | J08  __ __  (preenchido pela crítica) |                  |      |      |        |

(\*) Independente ou 2ª porta da geladeira

## SEÇÃO J- CARACTERÍSTICAS DA MORADIA

| POSSE DE ITENS         | NÃO TEM                               | TEM (Quantidade) |      |      |        |
|------------------------|---------------------------------------|------------------|------|------|--------|
|                        |                                       | UM               | DOIS | TRÊS | QUATRO |
| Telefone móvel         | 0                                     | 1                | 2    | 3    | 4      |
| Telefone fixo          | 0                                     | 2                | 2    | 2    | 2      |
| Fogão                  | 0                                     | 1                | 2    | 3    | 4      |
| Computador             | 0                                     | 4                | 5    | 6    | 7      |
| TV a cabo              | 0                                     | 4                | 7    | 9    | 9      |
| Internet               | 0                                     | 3                | 4    | 4    | 4      |
| Motocicleta            | 0                                     | 2                | 2    | 2    | 2      |
| <b>TOTAL DE PONTOS</b> | J08  __ __  (preenchido pela crítica) |                  |      |      |        |

### AValiação DO RISCO AMBIENTAL

AS QUESTÕES A SEGUIR DEVEM SER RESPONDIDAS DE ACORDO COM A OBSERVAÇÃO DA ENTREVISTADORA.

J. 14  
O(A) idoso(a) :

J09

|                                            |   |
|--------------------------------------------|---|
| CONSEGUE ANDAR.....                        | 1 |
| É ACAMADO .....                            | 2 |
| UTILIZA CADEIRA DE RODAS PARA SE LOCOMOVER | 3 |

Na entrada da casa/prédio onde o(a) idoso(a) mora observa-se a presença de:

J.17a ESCADAS J10

J.17b RAMPAS J11

J.17c CORRIMÃO J12

| SIM | NÃO |
|-----|-----|
| 1   | 2   |
| 1   | 2   |
| 1   | 2   |

J. 20  
HÁ QUANTO TEMPO O(A) SR(A) MORA NESTA CASA/APARTAMENTO?

J13

|                      |   |
|----------------------|---|
| Menos de 1 ano ..... | 1 |
| Mais de 1 ano .....  | 2 |
| NS .....             | 8 |
| NR .....             | 9 |

J. 21  
QUANDO ESTÁ EM SUA CASA/APARTAMENTO, **DURANTE O DIA**, QUE TIPO DE CALÇADO NORMALMENTE O(A) SR(A) COSTUMA UTILIZAR?  
  
Assinale o que for mais freqüente (apenas um).

J14

|                                             |   |
|---------------------------------------------|---|
| Sapato fechado COM solado de borracha ..... | 1 |
| Sapato fechado SEM solado de borracha ..... | 2 |
| Chinelos ou tamancos .....                  | 3 |
| Anda descalço, COM meias .....              | 4 |
| Anda descalço, SEM meias .....              | 5 |
| OUTRO.....                                  | 6 |
| (especifique)                               |   |
| NS .....                                    | 8 |
| NR .....                                    | 9 |

**SEÇÃO J- CARACTERÍSTICAS DA MORADIA**

J. 22

QUANDO LEVANTA, **DURANTE A NOITE**, QUE TIPO DE CALÇADO NORMALMENTE O(A) SR(A) COSTUMA UTILIZAR?

Assinale o que for mais freqüente (apenas um).

**J15**

|                                             |   |
|---------------------------------------------|---|
| Sapato fechado COM solado de borracha ..... | 1 |
| Sapato fechado SEM solado de borracha ..... | 2 |
| Chinelos ou tamancos .....                  | 3 |
| Anda descalço, COM meias .....              | 4 |
| Anda descalço, SEM meias .....              | 5 |
| OUTRO.....                                  | 6 |
| (especifique)                               |   |
| Não costuma se levantar à noite .....       | 7 |
| NS .....                                    | 8 |
| NR .....                                    | 9 |

AS QUESTÕES A SEGUIR DEVEM SER RESPONDIDAS SE **EXISTIR ESCADA** NO INTERIOR DA CASA/APARTAMENTO.

J. 23a

Há escadas no interior da casa/apartamento onde o(a) idoso(a) reside?

**J16**

|           |                |
|-----------|----------------|
| Sim ..... | 1              |
| Não ..... | 2 Vá para J.26 |
| NS .....  | 8              |
| NR .....  | 9              |

| A(s) escada(s) são:                                                       |            |
|---------------------------------------------------------------------------|------------|
| J.23b1 Retas                                                              | <b>J17</b> |
| J.23b2 Em curva ou caracol                                                | <b>J18</b> |
| J.23b3 COM corrimão (apenas 1 lado)                                       | <b>J19</b> |
| J.23b4 COM corrimão (dos 2 lados)                                         | <b>J20</b> |
| J.23b5 SEM corrimão                                                       | <b>J21</b> |
| J.23b6 Iluminadas                                                         | <b>J22</b> |
| J.23b7 Acarpetadas                                                        | <b>J23</b> |
| J.23b8 Enceradas ou com piso escorregadio                                 | <b>J24</b> |
| J.23b9 Com objetos espalhados pelos degraus (livros, vasos, sapatos, etc) | <b>J25</b> |

| SIM | NÃO |
|-----|-----|
| 1   | 2   |
| 1   | 2   |
| 1   | 2   |
| 1   | 2   |
| 1   | 2   |
| 1   | 2   |
| 1   | 2   |
| 1   | 2   |
| 1   | 2   |

AS QUESTÕES A SEGUIR REFEREM-SE AO LOCAL, NO INTERIOR DA CASA/APARTAMENTO, ONDE O(A) IDOSO(A) COSTUMA **TOMAR BANHO**.

J. 36a

O(a) idoso(a) usualmente toma banho:

**J26**

|                                               |               |
|-----------------------------------------------|---------------|
| No banheiro (chuveiro ou banheira) .....      | 1             |
| No banheiro (sentado no vaso sanitário) ..... | 2             |
| No leito (na cama) .....                      | 3 Vá para J43 |
| NS .....                                      | 8             |
| NR .....                                      | 9             |

## SEÇÃO J- CARACTERÍSTICAS DA MORADIA

| No local onde o(a) idoso(a) toma banho há:                                                         |            | SIM | NÃO | Não se aplica |
|----------------------------------------------------------------------------------------------------|------------|-----|-----|---------------|
| J.36b Chuveiro                                                                                     | <b>J27</b> | 1   | 2   | 3             |
| J.36c Banheira                                                                                     | <b>J28</b> | 1   | 2   | 3             |
| J.36d Barra de apoio no interior do local onde está o chuveiro/banheira                            | <b>J29</b> | 1   | 2   | 3             |
| J.36e tapete de borracha ou piso antiderrapante no interior do local onde está o chuveiro/banheira | <b>J30</b> | 1   | 2   | 3             |
| J.36f Banco ou cadeira para banho                                                                  | <b>J31</b> | 1   | 2   | 3             |
| J.36g Barra de apoio ao lado do vaso sanitário                                                     | <b>J32</b> | 1   | 2   | 3             |

AS QUESTÕES A SEGUIR REFEREM-SE AO(S) LOCAL(IS), NO INTERIOR DA CASA/APARTAMENTO, POR ONDE O(A) IDOSO(A) COSTUMA **CIRCULAR OU ANDAR**.

| No local por onde o(a) idoso(a) costuma andar/ circular observa(m)-se: |            | SIM | NÃO | NR |
|------------------------------------------------------------------------|------------|-----|-----|----|
| J.29 Piso escorregadio ou encerado                                     | <b>J33</b> | 1   | 2   | 9  |
| J.30 Tapetes soltos                                                    | <b>J34</b> | 1   | 2   | 9  |
| J.31 Objetos desordenados (livros, vasos, sapatos, papéis, etc)        | <b>J35</b> | 1   | 2   | 9  |
| J.32 Móveis muito pesados                                              | <b>J36</b> | 1   | 2   | 9  |
| J.33 Piso com diferença(s) de nível (degraus)                          | <b>J37</b> | 1   | 2   | 9  |

J. 34

O(a) Sr(a) costuma se apoiar nos moveis ou parede para se locomover de um cômodo à outro no interior da casa/apartamento?

**J38**

Sim ..... 1

Não ..... 2

NS ..... 8

NR ..... 9

J. 35

O(a) Sr(a) deixa de ir a algum cômodo no interior da casa/apartamento por sentir dificuldade de acessá-lo?

**J39**

Sim ..... 1

Não ..... 2

NS ..... 8

NR ..... 9



## SEÇÃO J- CARACTERÍSTICAS DA MORADIA

AS QUESTÕES A SEGUIR REFEREM-SE ÀS CALÇADAS OU RUAS, EXTERNAS A CASA/APARTAMENTO, POR ONDE O(A) IDOSO(A) COSTUMA(VA) CIRCULAR OU ANDAR.

J. 36\_2  
O(a) Sr(a) costuma sair à rua para passear ou caminhar (com ou sem outras pessoas)?

**J40**

Sim ..... 1  
Não ..... 2  
NS ..... 8  
NR ..... 9

J. 36\_3  
Com que frequência as **CONDIÇÕES DA RUA OU DAS CALÇADAS** foram impedimento para que o(a) Sr(a) saísse para caminhar ou passear (aclive, declive, presença de buracos ou irregularidades)?

**J41**

SEMPRE ..... 1  
ÀS VEZES ..... 2  
NUNCA ..... 3  
NS ..... 8  
NR ..... 9

J. 36\_4  
Com que frequência **O MEDO DA VIOLÊNCIA** foi impedimento para que o(a) Sr(a) saísse à rua (medo de assalto, atropelamento, etc)?

**J42**

SEMPRE ..... 1  
ÀS VEZES ..... 2  
NUNCA ..... 3  
NS ..... 8  
NR ..... 9

AS QUESTÕES A SEGUIR REFEREM-SE À PRESENÇA DE ANIMAIS DOMÉSTICOS NO INTERIOR DA CASA/APARTAMENTO **PERTENCENTES** AO(A) IDOSO(A).

J. 43  
O(a) Sr(a) possui animais domésticos?

**J43**

Sim ..... 1  
Não ..... 2 Vá p/ a seção M  
NS ..... 8  
NR ..... 9

J. 43a  
Quanto e de que tipo são seus animais domésticos?

**J44**

Gato(s) ..... 1  
Número: |\_\_|\_\_|  
Cachorro(s) ..... 2  
Número: |\_\_|\_\_|  
Ave(s) ..... 3  
Número: |\_\_|\_\_|  
Outro(s) ..... 4  
Número: |\_\_|\_\_|  
NS ..... 8  
NR ..... 9

**SEÇÃO J- CARACTERÍSTICAS DA MORADIA**

J. 43b  
 O(a) Sr(a) costuma sair de casa por causa de seu(s) animal(is) doméstico(s) (para comprar comida, levar para passear, levar ao veterinário, etc)?

**J45**

- Sim ..... 1
- Não ..... 2
- Outra pessoa faz ..... 3
- NS ..... 8
- NR ..... 9

J. 43c  
 O(a) Sr(a), alguma vez, mudou sua rotina por causa de seu(s) animal(is) doméstico(s) (deixou de viajar ou sair, receber pessoas, etc)?

**J46**

- Sim ..... 1
- Não ..... 2
- NS ..... 8
- NR ..... 9

J. 43d  
 A presença de animal(is) doméstico(s) interfere no seu estado de humor (sente-se mais ou menos solitário, sente-se mais ou menos irritado, etc)?

**J47**

- Sim, positivamente ..... 1
- Sim, negativamente ..... 2
- Não ..... 3
- NS ..... 8
- NR ..... 9

J. 43e  
 A presença de animal(is) doméstico(s) interfere no(s) seu relacionamento(s) com amigo(s) ou familiares (visitam mais ou menos, viaja mais ou menos, etc)?

**J48**

- Sim, positivamente ..... 1
- Sim, negativamente ..... 2
- Não ..... 3
- NS ..... 8
- NR ..... 9

J. 43f  
 Quão **IMPORTANTE** para o(a) Sr(a) é seu animal(is) de estimação?

**J49**

- MUITO IMPORTANTE ..... 1
- IMPORTANTE ..... 2
- INDIFERENTE ..... 3
- POUCO IMPORTANTE ..... 4
- NADA IMPORTANTE ..... 5
- NS ..... 8
- NR ..... 9

Observações: \_\_\_\_\_  
 \_\_\_\_\_  
 \_\_\_\_\_  
 \_\_\_\_\_  
 \_\_\_\_\_

## SEÇÃO M. MAUS TRATOS

FAREMOS AGORA ALGUMAS PERGUNTAS SOBRE A SUA RELAÇÃO COM AS PESSOAS QUE O RODEIAM E A ATITUDE QUE ESSAS PESSOAS COSTUMAM TER COM O(A) SR(A).

**M.1**

No último ano, alguma das pessoas que o rodeiam tem gritado com o(a) Sr(a) SEM RAZÃO?

SIM ..... 1  
NÃO ..... 2  
NS ..... 8  
NR ..... 9

VÁ PARA  
**M.3**

**M.2**

Com que frequência?

TODOS OS DIAS ..... 1  
DUAS OU TRÊS VEZES POR SEMANA ..... 2  
UMA VEZ POR SEMANA ..... 3  
DUAS A TRÊS VEZES POR MES ..... 4  
UMA VEZ POR MÊS OU MENOS ..... 5  
NS ..... 8  
NR ..... 9

**M.3**

No último ano, alguma das pessoas que o rodeiam o(a) tem chamado por algum nome ou apelido que o(a) Sr(a) não goste?

SIM ..... 1  
NÃO ..... 2  
NS ..... 8  
NR ..... 9

VÁ PARA  
**M.5**

**M.4**

Com que frequência?

TODOS OS DIAS ..... 1  
DUAS OU TRÊS VEZES POR SEMANA ..... 2  
UMA VEZ POR SEMANA ..... 3  
DUAS A TRÊS VEZES POR MES ..... 4  
UMA VEZ POR MÊS OU MENOS ..... 5  
NS ..... 8  
NR ..... 9

**M.5**

No último ano, alguma das pessoas que o rodeiam tem usado ou mexido no seu dinheiro sem a sua autorização?

SIM ..... 1  
NÃO ..... 2  
NS ..... 8  
NR ..... 9

VÁ PARA  
**M.7**

**M.6**

Com que frequência?

TODOS OS DIAS ..... 1  
DUAS OU TRÊS VEZES POR SEMANA ..... 2  
UMA VEZ POR SEMANA ..... 3  
DUAS A TRÊS VEZES POR MES ..... 4  
UMA VEZ POR MÊS OU MENOS ..... 5  
NS ..... 8  
NR ..... 9

## SEÇÃO M. MAUS TRATOS

**M.7**

No último ano, alguma das pessoas que o rodeiam o(a) tem ameaçado(a) por não fazer o que eles querem que o(a) Sr(a) faça?

SIM ..... 1  
NÃO ..... 2  
NS ..... 8  
NR ..... 9

VÁ PARA  
**M.9**

**M.8**

Com que frequência?

TODOS OS DIAS ..... 1  
DUAS OU TRÊS VEZES POR SEMANA ..... 2  
UMA VEZ POR SEMANA ..... 3  
DUAS A TRÊS VEZES POR MES ..... 4  
UMA VEZ POR MÊS OU MENOS ..... 5  
NS ..... 8  
NR ..... 9

**M.9**

No último ano, alguma das pessoas que o rodeiam tem batido ou esbofeteado o(a) Sr(a)?

SIM ..... 1  
NÃO ..... 2  
NS ..... 8  
NR ..... 9

VÁ PARA  
**M.11**

**M.10**

Com que frequência?

TODOS OS DIAS ..... 1  
DUAS OU TRÊS VEZES POR SEMANA ..... 2  
UMA VEZ POR SEMANA ..... 3  
DUAS A TRÊS VEZES POR MES ..... 4  
UMA VEZ POR MÊS OU MENOS ..... 5  
NS ..... 8  
NR ..... 9

**M.11**

No último ano, alguma das pessoas que o rodeiam tem sacudido ou chacoalhado o(a) Sr(a)?

SIM ..... 1  
NÃO ..... 2  
NS ..... 8  
NR ..... 9

VÁ PARA  
**M.13**

**M.12**

Com que frequência?

TODOS OS DIAS ..... 1  
DUAS OU TRÊS VEZES POR SEMANA ..... 2  
UMA VEZ POR SEMANA ..... 3  
DUAS A TRÊS VEZES POR MES ..... 4  
UMA VEZ POR MÊS OU MENOS ..... 5  
NS ..... 8  
NR ..... 9

## SEÇÃO M. MAUS TRATOS

**M.13**

No último ano, alguma das pessoas que o rodeiam tem roubado seu dinheiro ou algum pertence importante para o(a) Sr(a)?

SIM ..... 1  
NÃO ..... 2  
NS ..... 8  
NR ..... 9

VÁ PARA  
perguntas e  
comentários  
finais

**M.14**

Com que frequência?

TODOS OS DIAS ..... 1  
DUAS OU TRÊS VEZES POR SEMANA ..... 2  
UMA VEZ POR SEMANA ..... 3  
DUAS A TRÊS VEZES POR MES ..... 4  
UMA VEZ POR MÊS OU MENOS ..... 5  
NS ..... 8  
NR ..... 9

## PERGUNTAS E COMENTÁRIOS FINAIS

|                                                                                                                               |
|-------------------------------------------------------------------------------------------------------------------------------|
| 1.<br><b>Observou situação de violência, abandono ou maus tratos de algum integrante da casa com relação ao entrevistado?</b> |
| 2.<br><b>Descreva a situação:</b>                                                                                             |
| 3.<br><b>Teve dificuldades para completar o questionário individual?</b>                                                      |
| 4.<br><b>De que tipo?</b>                                                                                                     |
| 5.<br><b>Ocorreu alguma situação especial que tenha dificultado seu trabalho durante a entrevista?</b>                        |
| 6.<br><b>Descreva a situação:</b>                                                                                             |
| 7.<br><b>Mais alguém esteve presente durante a entrevista (além do informante ou substituto)?</b>                             |

SIM ..... 1  
NÃO ..... 2 → **VÁ PARA 3**

Textual \_\_\_\_\_  
\_\_\_\_\_  
\_\_\_\_\_  
\_\_\_\_\_

SIM ..... 1  
NÃO ..... 2 → **VÁ PARA 5**

Textual \_\_\_\_\_  
\_\_\_\_\_  
\_\_\_\_\_  
\_\_\_\_\_

SIM ..... 1  
NÃO ..... 2 → **VÁ PARA 7**

Textual \_\_\_\_\_  
\_\_\_\_\_  
\_\_\_\_\_  
\_\_\_\_\_

SIM ..... 1  
NÃO ..... 2 → **VÁ PARA 9**

## PERGUNTAS E COMENTÁRIOS FINAIS

8. Que relação tinham com a pessoa entrevistada e que tipo de participação tiveram durante a entrevista?

Textual \_\_\_\_\_  
\_\_\_\_\_  
\_\_\_\_\_  
\_\_\_\_\_

9. Houve recusa e oposição da pessoa entrevistada durante o desenvolvimento da entrevista?

SIM ..... 1  
NÃO ..... 2 →

VÁ PARA  
11

10. Em que parte ou seção da entrevista?

Textual \_\_\_\_\_  
\_\_\_\_\_  
\_\_\_\_\_  
\_\_\_\_\_

11. Em que horário e dia da semana considera que é mais fácil encontrar a pessoa entrevistada, caso seja necessário um novo contato.

Textual \_\_\_\_\_  
\_\_\_\_\_  
\_\_\_\_\_  
\_\_\_\_\_

## SEÇÃO N - CUIDADORES

ESSA SEÇÃO DEVERÁ SER PREENCHIDA PARA AQUELES IDOSOS QUE **REFERIRAM RECEBER AJUDA** NO DESEMPENHO DE SUAS ATIVIDADES DE VIDA DIÁRIA (SEÇÃO D). ELAS DEVEM SER FEITAS AO “CUIDADOR” MAIS CITADO PELO(A) IDOSO(A) OU SEJA, AQUELA PESSOA QUE MAIS O AJUDA NO DESEMPENHO DESSAS ATIVIDADES.

FAÇA A ENTREVISTA COM O CUIDADOR **SEM** A PRESENÇA DA PESSOA IDOSA.

NOME DO CUIDADOR ENTREVISTADO: .....

|                                                                                  |                                                                                                                                                                                                                                                                                                                                                                                                                                                         |
|----------------------------------------------------------------------------------|---------------------------------------------------------------------------------------------------------------------------------------------------------------------------------------------------------------------------------------------------------------------------------------------------------------------------------------------------------------------------------------------------------------------------------------------------------|
| <p>N. 1a</p> <p>O(A) cuidador(a) é :</p>                                         | <p>HOMEM ..... 1</p> <p>MULHER ..... 2</p>                                                                                                                                                                                                                                                                                                                                                                                                              |
| <p>N. 1b</p> <p>O(A) cuidador(a) nasceu em que ano /tem qual idade?</p>          | <p>Ano de nascimento  __   __   __   __ </p> <p>Idade  __   __  anos</p> <p>NR..... 9</p>                                                                                                                                                                                                                                                                                                                                                               |
| <p>N. 1c</p> <p>O(A) cuidador(a) é :</p>                                         | <p>SOLTEIRO(A) ..... 1</p> <p>CASADO(A) / AMASIADO(A) ..... 2</p> <p>SEPARADO(A)/ DESQUITADO(A)/ DIVORCIADO(A) .. 3</p> <p>VIÚVO(A) ..... 4</p> <p>NR..... 9</p>                                                                                                                                                                                                                                                                                        |
| <p>N. 1d</p> <p>O(A) cuidador(a) sabe ler e escrever um recado :</p>             | <p>Sim ..... 1</p> <p>Não ..... 2</p> <p>NR..... 9</p>                                                                                                                                                                                                                                                                                                                                                                                                  |
| <p>N. 1e</p> <p>Qual o tipo de relação do(a) cuidador(a) com o(a) idoso(a) :</p> | <p>Esposo(a) / companheiro(a)..... 01</p> <p>Filho(a)..... 02</p> <p>Pais..... 03</p> <p>Sogros..... 04</p> <p>Irmãos..... 05</p> <p>Genro ou Nora..... 06</p> <p>Neto(a)..... 07</p> <p>Enteado(a)..... 08</p> <p>Outro familiar não remunerado..... 09</p> <p>Outro familiar remunerado..... 10</p> <p>Outro não familiar não remunerado..... 11</p> <p>Empregado Doméstico..... 12</p> <p>Cuidador ..... 13</p> <p>NS..... 98</p> <p>NR ..... 99</p> |
| <p>N. 1f</p> <p>Onde reside o(a) cuidador(a) ?</p>                               | <p>Na mesma casa junto com o(a) idoso(a) ..... 1</p> <p>Em outra casa próxima à casa do(a) idoso(a) ..... 2</p> <p>Em outra casa distante da casa do(a) idoso(a) ..... 3</p> <p>NR..... 9</p>                                                                                                                                                                                                                                                           |



## SEÇÃO N - CUIDADORES

|                                                                                                                              |                                                                                                                                                                                                                            |
|------------------------------------------------------------------------------------------------------------------------------|----------------------------------------------------------------------------------------------------------------------------------------------------------------------------------------------------------------------------|
| <p>N. 1g<br/>Com que frequência o(a) cuidador(a) auxilia o(a) idoso(a) no desempenho de suas atividades de vida diária ?</p> | <p>O tempo todo ..... 1<br/>Uma ou mais vezes ao dia ..... 2<br/>Em dias alternados ..... 3<br/>Pelo menos 1 vez por semana ..... 4<br/>Sempre que necessário ..... 5<br/>Outro..... 6<br/>(especifique)<br/>NR..... 9</p> |
| <p>N. 1h<br/>O(A) cuidador(a) precisou parar de trabalhar ou estudar para cuidar do(a) idoso(a)?</p>                         | <p>Sim ..... 1<br/>Não ..... 2<br/>NR..... 9</p>                                                                                                                                                                           |
| <p>N. 1i<br/>Há quanto tempo o(a) cuidador(a) auxilia o(a) idoso(a)?</p>                                                     | <p> __ __  dias<br/> __ __  meses<br/> __ __  anos<br/>NR..... 99</p>                                                                                                                                                      |
| <p>N. 1j<br/>Há alguém que auxilie o(a) cuidador(a) no cuidado do(a) idoso(a)?</p>                                           | <p>Sim ..... 1<br/>Não ..... 2<br/>NR..... 9</p>                                                                                                                                                                           |

### APGAR DO CUIDADOR (para ser aplicado em cuidadores familiares)

| <p>AS SEGUINTE PERGUNTAS FORAM ELABORADAS PARA NOS AJUDAR A COMPREENDER O(A) SR(A) E SUA FAMÍLIA. SINTA-SE À VONTADE PARA FAZER PERGUNTAS SOBRE QUALQUER ITEM DO QUESTIONÁRIO.</p> <p><b>“FAMÍLIA” É (SÃO) A(S) PESSOA(S) COM A(S) QUAL(AIS) HABITUALMENTE SE VIVE. CONSIDERE FAMÍLIA AQUELAS PESSOAS COM AS QUAIS TEM LAÇOS EMOCIONAIS MAIS FORTES.</b></p> |                                                                                                                                                               | SEMPRE | QUASE SEMPRE | ALGUMAS VEZES | RARAMENTE | NUNCA |
|--------------------------------------------------------------------------------------------------------------------------------------------------------------------------------------------------------------------------------------------------------------------------------------------------------------------------------------------------------------|---------------------------------------------------------------------------------------------------------------------------------------------------------------|--------|--------------|---------------|-----------|-------|
| N.23a                                                                                                                                                                                                                                                                                                                                                        | Estou satisfeito(a) pois posso recorrer à minha família em busca de ajuda quando alguma coisa está me incomodando ou preocupando.                             | 4      | 3            | 2             | 1         | 0     |
| N.23b                                                                                                                                                                                                                                                                                                                                                        | Estou satisfeito(a) com a maneira pela qual minha família e eu conversamos e compartilhamos os problemas.                                                     | 4      | 3            | 2             | 1         | 0     |
| N.23c                                                                                                                                                                                                                                                                                                                                                        | Estou satisfeito(a) com a maneira como minha família aceita e apóia meus desejos de iniciar ou buscar novas atividades e procurar novos caminhos ou direções. | 4      | 3            | 2             | 1         | 0     |
| N.23d                                                                                                                                                                                                                                                                                                                                                        | Estou satisfeito(a) com a maneira pela qual minha família demonstra afeição e reage às minhas emoções, tais como raiva, mágoa ou amor.                        | 4      | 3            | 2             | 1         | 0     |
| N.23e                                                                                                                                                                                                                                                                                                                                                        | Estou satisfeito(a) com a maneira pela qual minha família e eu compartilhamos o tempo juntos.                                                                 | 4      | 3            | 2             | 1         | 0     |

SEÇÃO N - CUIDADORES

|                                                                                                                                                                                                                                                                                                       | NUNCA | RARAMENTE | ALGUMAS VEZES | FREQUENTEMENTE | SEMPRE |
|-------------------------------------------------------------------------------------------------------------------------------------------------------------------------------------------------------------------------------------------------------------------------------------------------------|-------|-----------|---------------|----------------|--------|
| A SEGUIR ENCONTRA-SE UMA LISTA DE AFIRMATIVAS QUE REFLETEM COMO AS PESSOAS, ALGUMAS VEZES, PODEM SE SENTIR QUANDO CUIDAM DE OUTRA PESSOA. DEPOIS DE CADA AFIRMATIVA, INDIQUE COM QUE FREQUÊNCIA O(A) SR(A) SE SENTE EM RELAÇÃO AO QUE ESTÁ SENDO PERGUNTADO. NÃO EXISTEM RESPOSTAS CERTAS OU ERRADAS. |       |           |               |                |        |
| N. 1 - O(a) Sr(a) sente que <i>NOME DO IDOSO(A)</i> pede mais ajuda do que ele(a) necessita?                                                                                                                                                                                                          | 0     | 1         | 2             | 3              | 4      |
| N. 2 - O(a) Sr(a) sente que por causa do tempo que o (a) Sr(a) gasta com <i>NOME DO IDOSO(A)</i> não tem tempo suficiente para si mesmo(a)?                                                                                                                                                           | 0     | 1         | 2             | 3              | 4      |
| N. 3 - O(a) Sr(a) se sente estressado(a) entre cuidar de <i>NOME DO IDOSO(A)</i> e suas outras responsabilidades com a família e o trabalho?                                                                                                                                                          | 0     | 1         | 2             | 3              | 4      |
| N. 4 - O(a) Sr(a) sente envergonhado(a) com o comportamento de <i>NOME DO IDOSO(A)</i> ?                                                                                                                                                                                                              | 0     | 1         | 2             | 3              | 4      |
| N. 5 - O(a) Sr(a) sente irritado(a) quando <i>NOME DO IDOSO(A)</i> está por perto?                                                                                                                                                                                                                    | 0     | 1         | 2             | 3              | 4      |
| N. 6 - O(a) Sr(a) sente que <i>NOME DO IDOSO(A)</i> afeta negativamente seus relacionamentos com outros membros da família ou amigos?                                                                                                                                                                 | 0     | 1         | 2             | 3              | 4      |
| N. 7 - O(a) Sr(a) sente receio pelo futuro de <i>NOME DO IDOSO(A)</i> ?                                                                                                                                                                                                                               | 0     | 1         | 2             | 3              | 4      |
| N. 8 - O(a) Sr(a) sente que de <i>NOME DO IDOSO(A)</i> depende do(a) Sr(a)?                                                                                                                                                                                                                           | 0     | 1         | 2             | 3              | 4      |
| N. 9 - O(a) Sr(a) se sente tenso(a) quando <i>NOME DO IDOSO(A)</i> está por perto?                                                                                                                                                                                                                    | 0     | 1         | 2             | 3              | 4      |
| N. 10 - O(a) Sr(a) sente que sua saúde foi afetada por causa do seu envolvimento com <i>NOME DO IDOSO(A)</i> ?                                                                                                                                                                                        | 0     | 1         | 2             | 3              | 4      |
| N. 11 - O(a) Sr(a) sente que Não tem tanta privacidade como gostaria por causa de <i>NOME DO IDOSO(A)</i> ?                                                                                                                                                                                           | 0     | 1         | 2             | 3              | 4      |
| N. 12 - O(a) Sr(a) sente que sua vida social tem sido prejudicada em razão de ter de cuidar de <i>NOME DO IDOSO(A)</i> ?                                                                                                                                                                              | 0     | 1         | 2             | 3              | 4      |
| N. 13 - O(a) Sr(a) não se sente à vontade em receber visitas em casa por causa de <i>NOME DO IDOSO(A)</i> ?                                                                                                                                                                                           | 0     | 1         | 2             | 3              | 4      |
| N. 14 - O(a) Sr(a) sente que <i>NOME DO IDOSO(A)</i> espera que o(a) Sr(a) cuide dele(a) como se fosse a única pessoa de quem ele(a) pode depender?                                                                                                                                                   | 0     | 1         | 2             | 3              | 4      |
| N. 15 - O(a) Sr(a) sente que não tem dinheiro suficiente para cuidar de <i>NOME DO IDOSO(A)</i> somando-se às suas outras despesas?                                                                                                                                                                   | 0     | 1         | 2             | 3              | 4      |
| N. 16 - O(a) Sr(a) sente que será incapaz de cuidar de <i>NOME DO IDOSO(A)</i> por muito mais tempo?                                                                                                                                                                                                  | 0     | 1         | 2             | 3              | 4      |
| N. 17 - O(a) Sr(a) sente que perdeu o controle de sua vida desde a doença de <i>NOME DO IDOSO(A)</i> ?                                                                                                                                                                                                | 0     | 1         | 2             | 3              | 4      |
| N. 18 - O(a) Sr(a) gostaria de simplesmente deixar que outra pessoa cuidasse de <i>NOME DO IDOSO(A)</i> ?                                                                                                                                                                                             | 0     | 1         | 2             | 3              | 4      |
| N. 19 - O(a) Sr(a) se sente em dúvida sobre o que fazer por <i>NOME DO IDOSO(A)</i> ?                                                                                                                                                                                                                 | 0     | 1         | 2             | 3              | 4      |
| N. 20 - O(a) Sr(a) sente que deveria estar fazendo mais por <i>NOME DO IDOSO(A)</i> ?                                                                                                                                                                                                                 | 0     | 1         | 2             | 3              | 4      |
| N. 21 - O(a) Sr(a) sente que poderia cuidar melhor de <i>NOME DO IDOSO(A)</i> ?                                                                                                                                                                                                                       | 0     | 1         | 2             | 3              | 4      |
| N. 22 - De uma maneira geral, quanto o(a) Sr(a) se sente sobrecarregado por cuidar de <i>NOME DO IDOSO(A)</i> ?                                                                                                                                                                                       | 0     | 1         | 2             | 3              | 4      |

## SEÇÃO K. ANTROPOMETRIA

HORA DE INÍCIO: |\_\_|\_|:|\_\_|\_|

K.14

O(a) Sr.(a) fez alguma cirurgia no braço ou na mão que usa regularmente, nos últimos três meses?

SIM ..... 1 →  
NÃO ..... 2  
NS ..... 8  
NR ..... 9

VÁ PARA A  
K1a

K.15A

Agora vou usar um instrumento que se chama **DINAMÔMETRO** para testar a força da sua mão. Este teste somente pode ser feito se o Sr. **NÃO** sofreu nenhuma cirurgia no braço ou na mão, nos últimos três meses.

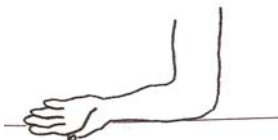

Use o braço que acha que tem mais força. Coloque o cotovelo sobre a mesa e estique o braço com a palma da mão para cima. Pegue as duas peças de metal juntas assim (faça a demonstração). Preciso ajustar o aparelho para o seu tamanho?

Agora, aperte bem forte. Tão forte quanto puder. As duas peças de metal não vão se mover, mas eu poderei ver qual a intensidade da força que o Sr. está usando. Vou fazer este teste 2 vezes. Avise-me se sentir alguma dor ou incômodo.

DINAMÔMETRO

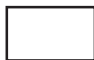

ANOTE A MÃO USADA NO TESTE:

1.DIREITA

2.ESQUERDA

→

### PRIMEIRA VEZ:

TENTOU MAS NÃO CONSEGUIU ..... 95  
NÃO TENTOU, POR ACHAR ARRISCADO ..... 96  
ENTREVISTADO INCAPACITADO ..... 97  
RECUSOU-SE A TENTAR ..... 98

COMPLETOU O TESTE:

|\_\_|\_|\_|,|\_\_|\_| kg

### SEGUNDA VEZ:

TENTOU MAS NÃO CONSEGUIU ..... 95  
NÃO TENTOU, POR ACHAR ARRISCADO ..... 96  
ENTREVISTADO INCAPACITADO ..... 97  
RECUSOU-SE A TENTAR ..... 98

COMPLETOU O TESTE:

|\_\_|\_|\_|,|\_\_|\_| kg

## SEÇÃO K. ANTROPOMETRIA

| ANOTE O APROPRIADO PARA A EXTREMIDADE CORRESPONDENTE |  | SIM               | NÃO |
|------------------------------------------------------|--|-------------------|-----|
| <b>PARA O BRAÇO ESQUERDO</b>                         |  |                   |     |
| K.1a<br>TEM TODOS OS DEDOS?                          |  | 1<br>VÁ PARA K.2a | 2   |
| K.1b<br>TEM A MÃO?                                   |  | 1<br>VÁ PARA K.1e | 2   |
| K.1c<br>TEM O ANTEBRAÇO?                             |  | 1<br>VÁ PARA K.1e | 2   |
| K.1d<br>TEM O BRAÇO?                                 |  | 1                 | 2   |
| K.1e<br>TEM ALGUM TIPO DE PRÓTESE?                   |  | 1                 | 2   |
| <b>PARA O BRAÇO DIREITO</b>                          |  |                   |     |
| K.2a<br>TEM TODOS OS DEDOS?                          |  | 1<br>VÁ PARA K.3a | 2   |
| K.2b<br>TEM A MÃO?                                   |  | 1<br>VÁ PARA K.2e | 2   |
| K.2c<br>TEM O ANTEBRAÇO?                             |  | 1<br>VÁ PARA K.2e | 2   |
| K.2d<br>TEM O BRAÇO?                                 |  | 1                 | 2   |
| K.2e<br>TEM ALGUM TIPO DE PRÓTESE?                   |  | 1                 | 2   |
| <b>PARA A PERNA ESQUERDA</b>                         |  |                   |     |
| K.3a<br>TEM TODOS OS DEDOS?                          |  | 1<br>VÁ PARA K.4a | 2   |
| K.3b<br>TEM O PÉ?                                    |  | 1<br>VÁ PARA K.3e | 2   |
| K.3c<br>TEM A PERNA?                                 |  | 1<br>VÁ PARA K.3e | 2   |
| K.3d<br>TEM A COXA?                                  |  | 1                 | 2   |
| K.3e<br>TEM ALGUM TIPO DE PRÓTESE?                   |  | 1                 | 2   |
| <b>PARA A PERNA DIREITA</b>                          |  |                   |     |
| K.4a<br>TEM TODOS OS DEDOS?                          |  | 1<br>VÁ PARA K.5  | 2   |
| K.4b<br>TEM O PÉ?                                    |  | 1<br>VÁ PARA K.4e | 2   |
| K.4c<br>TEM A PERNA?                                 |  | 1<br>VÁ PARA K.4e | 2   |
| K.4d<br>TEM A COXA?                                  |  | 1                 | 2   |
| K.4e<br>TEM ALGUM TIPO DE PRÓTESE?                   |  | 1                 | 2   |

**SEÇÃO K. ANTROPOMETRIA**

**TOMAR TRÊS MEDIDAS PARA TODAS AS PERGUNTAS ABAIXO**

|                                                                                                                                                                                                                                      |                                                                                  |
|--------------------------------------------------------------------------------------------------------------------------------------------------------------------------------------------------------------------------------------|----------------------------------------------------------------------------------|
| <p>K.5</p> <p><b>Precisamos medir sua altura e para isso, queremos que o(a) Sr(a) fique descalço(a). Coloque-se de pé, com pés e calcanhares juntos e com suas costas e cabeça encostadas na parede. Olhe bem para a frente.</b></p> | <p>ALTURA .....  __ __ __  cm</p> <p>NÃO CONSEGUE PARAR DE PÉ ..... 999</p>      |
| <p>K.6</p> <p><b>MEDIDA DA ALTURA DOS JOELHOS</b></p>                                                                                                                                                                                | <p>ALTURA .....  __ __ __  cm</p>                                                |
| <p>K.7</p> <p><b>CIRCUNFERÊNCIA DO BRAÇO</b></p>                                                                                                                                                                                     | <p>CIRCUNFERÊNCIA DO BRAÇO .....  __ __ __  cm</p>                               |
| <p>K.8</p> <p><b>CIRCUNFERÊNCIA DA CINTURA</b></p>                                                                                                                                                                                   | <p>CINTURA .....  __ __ __  cm</p> <p>NÃO CONSEGUE PARAR DE PÉ ..... 999</p>     |
| <p>K.9</p> <p><b>CIRCUNFERÊNCIA DO QUADRIL</b></p>                                                                                                                                                                                   | <p>QUADRIL .....  __ __ __  cm</p> <p>NÃO CONSEGUE PARAR DE PÉ ..... 999</p>     |
| <p>K.10</p> <p><b>DOBRA CUTÂNEA TRICIPITAL</b></p>                                                                                                                                                                                   | <p>PREGA TRICIPITAL .....  __ __ __  mm</p>                                      |
| <p>K.10a</p> <p><b>DOBRA CUTÂNEA SUBESCAPULAR</b></p>                                                                                                                                                                                | <p>PREGA SUBESCAPULAR .....  __ __ __  mm</p>                                    |
| <p>K.11</p> <p><b>PESO</b></p>                                                                                                                                                                                                       | <p>PESO .....  __ __ __  .  __  kg</p> <p>NÃO CONSEGUE PARAR DE PÉ ..... 999</p> |
| <p>K.12</p> <p><b>CIRCUNFERÊNCIA DE PANTURRILHA</b></p>                                                                                                                                                                              | <p>CIRCUNFERÊNCIA DE PANTURRILHA .....  __ __ __  cm</p>                         |
| <p>K.12a</p> <p><b>LARGURA DO COTOVELO</b></p>                                                                                                                                                                                       | <p>LARGURA DO COTOVELO .....  __ __ __  cm</p>                                   |
| <p>K.13</p> <p><b>CIRCUNFERÊNCIA DO PUNHO</b></p>                                                                                                                                                                                    | <p>CIRCUNFERÊNCIA DO PULSO .....  __ __ __  cm</p>                               |

SEÇÃO K. ANTROPOMETRIA

**OBS.: Se ele(a) não fez o teste do dinamômetro a 1ª vez, passe para a Seção L.**

K.15

Agora vamos repetir o teste com o dinamômetro, mas com o braço em outra posição.

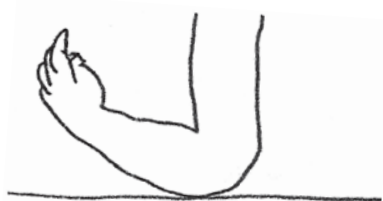

Use o braço que acha que tem mais força. Coloque o cotovelo sobre a mesa e estique o braço com a palma da mão para cima. Pegue as duas peças de metal juntas assim (faça a demonstração). Preciso ajustar o aparelho para o seu tamanho?

Agora, aperte bem forte. Tão forte quanto puder. As duas peças de metal não vão se mover, mas eu poderei ver qual a intensidade da força que o Sr. está usando. Vou fazer este teste 2 vezes. Avise-me se sentir alguma dor ou incômodo.

DINAMÔMETRO

**ANOTE A MÃO USADA NO TESTE:**

1.DIREITA     2.ESQUERDA    →   

**PRIMEIRA VEZ:**

- TENTOU MAS NÃO CONSEGUIU ..... 95
- NÃO TENTOU, POR ACHAR ARRISCADO ..... 96
- ENTREVISTADO INCAPACITADO ..... 97
- RECUSOU-SE A TENTAR ..... 98

COMPLETOU O TESTE:

|\_|\_|\_|\_|,|\_|\_|\_|kg

**SEGUNDA VEZ:**

- TENTOU MAS NÃO CONSEGUIU ..... 95
- NÃO TENTOU, POR ACHAR ARRISCADO ..... 96
- ENTREVISTADO INCAPACITADO ..... 97
- RECUSOU-SE A TENTAR ..... 98

COMPLETOU O TESTE:

|\_|\_|\_|\_|,|\_|\_|\_|kg

## SEÇÃO L. MOBILIDADE E FLEXIBILIDADE

PARA CONTINUARMOS PRECISO REALIZAR ALGUNS TESTES PARA MEDIR SUA MOBILIDADE E FLEXIBILIDADE. PRIMEIRO VOU-LHE MOSTRAR COMO FAZER CADA MOVIMENTO E, EM SEGUIDA, GOSTARIA QUE O(A) SR(A) TENTASSE REPETIR OS MEUS MOVIMENTOS. SE ACHAR QUE NÃO TEM CONDIÇÕES DE FAZÊ-LO, ACHAR ARRISCADO OU SE SENTIR INSEGURO(A) DIGA-ME E PASSAREMOS PARA OUTRO TESTE.

L.1 FILTRO

**INCAPACITADO PARA REALIZAR QUALQUER TESTE DE FLEXIBILIDADE E MOBILIDADE.**

SIM ..... 1  
NÃO ..... 2

ENCERRE A ENTREVISTA

### Timed Up & Go Test (TUGT)

L.10

#### ATENÇÃO:

Se **NÃO FOR POSSÍVEL LEVAR** a cadeira padrão, **USAR UMA CADEIRA COM BRAÇO** para o teste e medir a altura do assento e braço da cadeira conforme o desenho. Não havendo cadeira com braços não faça o teste e vá para L.1a.

Usou a cadeira padrão ( ) Sim ( ) Não

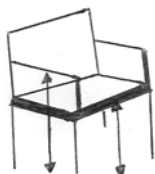

Altura do Braço: \_\_\_\_\_

Altura do Assento: \_\_\_\_\_

Nós vamos fazer um teste que consiste em se levantar da cadeira, caminhar o percurso delimitado, virar no final do percurso, retornar para a cadeira e sentar-se novamente (demonstre o teste). O(A) sr(a) pode utilizar qualquer dispositivo que esteja acostumado (bengala, andador ou muleta). Gostaria que o(a) sr(a) se sentasse, apoiasse suas costas no encosto da cadeira, apoiasse seus pés no chão e colocasse seus braços nos braços da cadeira (aguarde o(a) idoso(a) se posicionar e auxilie-o(a) se for necessário). Quando eu disser "já" gostaria que se levantasse e caminhasse por esse trajeto delimitado em sua velocidade habitual de caminhada, ou seja, da mesma forma que o(a) sr(a) caminharia na rua. No final do trajeto, gostaria que o(a) sr(a) virasse e retornasse para a cadeira e sentasse novamente. Podemos começar?

"JÁ" (acione o cronômetro)

**OBSERVAÇÕES:** Após o comando **JÁ** o cronômetro deve ser disparado. Mesmo que o idoso demore para se levantar da cadeira, esse tempo deverá ser contado no teste. O cronômetro deve ser parado somente quando o idoso retornar e sentar-se novamente na cadeira. Se o idoso parar ao levantar, ao girar ou antes de sentar-se o teste deverá ser repetido.

### TEMPO GASTO NA TAREFA

REALIZOU O TESTE EM: |\_\_| |\_\_|, |\_\_| |\_\_| segundos .... 1

NÃO REALIZOU O TESTE ..... 2

L.1a **PÉS LADO A LADO**

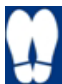

Quero que o Sr. fique em pé, com os pés juntos, um ao lado do outro, mantendo os olhos abertos. Por favor, mantenha essa posição até eu avisar (dez segundos).

Pode usar os braços, dobrar os joelhos ou mexer com o corpo, para se equilibrar; porém, tente não mexer os pés.

MANTEVE A POSIÇÃO POR 10 SEGUNDOS ..... 1 (1 PONTO) →

NÃO MANTEVE A POSIÇÃO POR 10 SEGUNDOS ..... 2 (0 PONTOS)

NÃO TENTOU ..... 98 (0 PONTOS)

REALIZOU O TESTE EM: segundos |\_\_| |\_\_|

ESCORE: |\_\_| |\_\_| pontos

VÁ PARA L.1c

## SEÇÃO L. MOBILIDADE E FLEXIBILIDADE

L. 1b

se o(a) idoso(a) **não tentou ou falhou** assinale o por que e depois vá para a questão L.3a

|                                                  |    |
|--------------------------------------------------|----|
| TENTOU MAS NÃO CONSEGUIU .....                   | 95 |
| NÃO PODE MANTER A POSIÇÃO SEM AUXÍLIO .....      | 90 |
| NÃO TENTOU, ENTREVISTADORA SENTIU-SE INSEGURA .  | 91 |
| NÃO TENTOU, IDOSO(A) SENTIU-SE INSEGURO(A) ..... | 96 |
| IDOSO(A) INCAPAZ DE COMPREENDER AS INSTRUÇÕES .  | 92 |
| OUTRO .....                                      | 93 |

*ESPECIFIQUE*

VÁ PARA  
L.3a

L.1c **UM PÉ UM POUCO À FRENTE DO OUTRO**

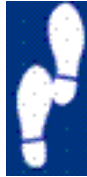

Agora, quero que o(a) Sr(a) tente ficar em pé, com o calcanhar de um dos pés encostado na lateral do dedão do pé oposto, por uns dez segundos. O Sr. pode usar qualquer pé, aquele que lhe dê mais segurança. Pode usar os braços, dobrar os joelhos ou mexer o corpo para se equilibrar; porém, tente não mexer os pés. Por favor, mantenha essa posição até eu avisar (dez segundos).

|                                             |               |
|---------------------------------------------|---------------|
| MANTEVE A POSIÇÃO POR 10 SEGUNDOS .....     | 1 (1 PONTO)   |
| NÃO MANTEVE A POSIÇÃO POR 10 SEGUNDOS ..... | 2 (0 PONTOS)  |
| NÃO TENTOU .....                            | 98 (0 PONTOS) |

VÁ PARA  
L.2

REALIZOU O TESTE EM: segundos |\_\_|\_\_|

SCORE: |\_\_| pontos

L. 1d

Se o(a) idoso(a) **não tentou ou falhou** assinale o por que e depois vá para a questão L.3a:

|                                                  |    |
|--------------------------------------------------|----|
| TENTOU MAS NÃO CONSEGUIU .....                   | 95 |
| NÃO PODE MANTER A POSIÇÃO SEM AUXÍLIO .....      | 90 |
| NÃO TENTOU, ENTREVISTADORA SENTIU-SE INSEGURA .  | 91 |
| NÃO TENTOU, IDOSO(A) SENTIU-SE INSEGURO(A) ..... | 96 |
| IDOSO(A) INCAPAZ DE COMPREENDER AS INSTRUÇÕES .  | 92 |
| OUTRO .....                                      | 93 |

*ESPECIFIQUE*

VÁ PARA  
L.3a

L.2 **UM PÉ ATRÁS DO OUTRO**

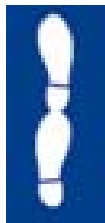

Agora, quero que o(a) Sr(a) tente ficar em pé, com o calcanhar de um dos pés na frente do outro pé, por uns dez segundos. O(A) Sr(a) pode usar qualquer pé, aquele que lhe dê mais segurança.

Pode usar os braços, dobrar os joelhos ou mexer o corpo para se equilibrar; porém, tente não mexer os pés. Por favor, mantenha essa posição até eu avisar (dez segundos).

|                                                 |               |
|-------------------------------------------------|---------------|
| MANTEVE A POSIÇÃO POR 10 SEGUNDOS .....         | 1 (2 PONTOS)  |
| MANTEVE A POSIÇÃO DE 3 A 9.99 SEGUNDOS .....    | 2 (1 PONTO)   |
| MANTEVE A POSIÇÃO POR MENOS DE 3 SEGUNDOS ..... | 3 (0 PONTOS)  |
| NÃO TENTOU .....                                | 98 (0 PONTOS) |

VÁ PARA  
L.3

REALIZOU O TESTE EM: segundos |\_\_|\_\_|

SCORE: |\_\_| pontos

L. 2a

Se o(a) idoso(a) **NÃO TENTOU OU FALHO** assinale o por que e depois vá para a questão L.3a:

|                                                     |    |
|-----------------------------------------------------|----|
| TENTOU MAS NÃO CONSEGUIU .....                      | 95 |
| NÃO PODE MANTER A POSIÇÃO SEM AUXÍLIO .....         | 90 |
| NÃO TENTOU, ENTREVISTADORA SENTIU-SE INSEGURA ..... | 91 |
| NÃO TENTOU, IDOSO(A) SENTIU-SE INSEGURO(A) .....    | 96 |
| IDOSO(A) INCAPAZ DE COMPREENDER AS INSTRUÇÕES ..... | 92 |
| OUTRO .....                                         | 93 |

*ESPECIFIQUE*

VÁ PARA  
L.3a



## SEÇÃO L. MOBILIDADE E FLEXIBILIDADE

L.3

Ficando de pé, gostaria que o(a) Sr(a) tentasse se equilibrar em um pé só, sem se apoiar em nada. Tente primeiro com qualquer um dos pés, depois tentaremos com o outro.

Eu contarei o tempo e vou lhe dizer quando começar e terminar (dez segundos). Podemos parar a qualquer momento que o(a) Sr(a) sinta que está perdendo o equilíbrio.

### PÉ DIREITO

TENTOU MAS NÃO CONSEGUIU ..... 95  
 NÃO TENTOU, POR ACHAR ARRISCADO ..... 96  
 RECUSOU-SE A TENTAR ..... 98

REALIZOU O TESTE EM: SEGUNDOS |\_\_|\_\_|

### PÉ ESQUERDO

TENTOU MAS NÃO CONSEGUIU ..... 95  
 NÃO TENTOU, POR ACHAR ARRISCADO ..... 96  
 RECUSOU-SE A TENTAR ..... 98

REALIZOU O TESTE EM: SEGUNDOS |\_\_|\_\_|

L.3a

### ESCORE DE EQUILÍBRIO

**TOTAL DE PONTOS** |\_\_|\_\_|

(Some os pontos das questões L1a, L1c e L2)

### L.3c CAMINHADA NÚMERO 1

#### DELIMITE O TRAJETO

Esse é o trajeto de caminhada. Eu gostaria que o(a) Sr(a) andasse de um ponto a outro desse percurso na sua velocidade habitual de caminhada ou seja, da mesma forma que o(a) Sr(a) caminharia numa rua para ir a uma loja.

REALIZOU O TESTE EM: |\_\_|\_\_|, |\_\_|\_\_| segundos .... 1

NÃO REALIZOU O TESTE ..... 2 →

VÁ PARA  
L.3e

### L.3d CAMINHADA NÚMERO 1

Para realizar a primeira caminhada o(a) idoso precisou utilizar algum dispositivo de ajuda?

SIM, BENGALA ..... 1  
 SIM, OUTRO ..... 2  
*ESPECIFIQUE*  
 NÃO ..... 3

L. 3e

Se o(a) idoso(a) **não tentou ou falhou** assinale o por que e depois vá para a questão L.3i:

TENTOU MAS NÃO CONSEGUIU ..... 90  
 NÃO PODE ANDAR SEM AUXÍLIO ..... 91  
 NÃO TENTOU, ENTREVISTADORA SENTIU-SE INSEGURA . 92  
 NÃO TENTOU, IDOSO(A) SENTIU-SE INSEGURO(A) ..... 93  
 IDOSO(A) INCAPAZ DE COMPREENDER AS INSTRUÇÕES . 94  
 OUTRO ..... 95  
*ESPECIFIQUE*  
 RECUSOU-SE ..... 96

VÁ PARA  
L.3i

### L.3f CAMINHADA NÚMERO 2

Agora, eu gostaria que o(a) Sr(a) repetisse a mesma caminhada. Lembre-se que é preciso andar de um ponto a outro do percurso na sua velocidade habitual de caminhada.

REALIZOU O TESTE EM: |\_\_|\_\_|, |\_\_|\_\_| segundos .. 1

NÃO REALIZOU O TESTE ..... 2 →

VÁ PARA  
L.3h

### L.3g CAMINHADA NÚMERO 2

Para realizar a segunda caminhada o(a) idoso precisou utilizar algum dispositivo de ajuda?

SIM, BENGALA ..... 1  
 SIM, OUTRO ..... 2  
*ESPECIFIQUE*  
 NÃO ..... 3

## SEÇÃO L. MOBILIDADE E FLEXIBILIDADE

L. 3h

Se o(a) idoso(a) **não tentou ou falhou** assinale o por que e depois vá para a questão L.3i:

|                                                  |    |                 |
|--------------------------------------------------|----|-----------------|
| TENTOU MAS NÃO CONSEGUIU .....                   | 90 | } VÁ PARA L. 3i |
| NÃO PODE ANDAR SEM AUXÍLIO .....                 | 91 |                 |
| NÃO TENTOU, ENTREVISTADORA SENTIU-SE INSEGURA .  | 92 |                 |
| NÃO TENTOU, IDOSO(A) SENTIU-SE INSEGURO(A) ..... | 93 |                 |
| IDOSO(A) INCAPAZ DE COMPREENDER AS INSTRUÇÕES .  | 94 |                 |
| OUTRO .....                                      | 95 |                 |
| <i>ESPECIFIQUE</i>                               |    |                 |
| RECUSOU-SE .....                                 | 96 |                 |

L. 3i

### TEMPO DE CAMINHADA E ESCORE

REGISTRE O MENOR TEMPO OBTIDO ENTRE AS DUAS CAMINHADAS. SE FEZ SÓ UMA, ANOTE ESSE TEMPO DE PERCURSO:

|\_|\_|\_|\_| . |\_|\_|\_|\_| segundos

Escore = |\_|\_|\_|\_| pontos

### PARA 3 METROS

|                                        |              |
|----------------------------------------|--------------|
| Não foi capaz de fazer o teste .....   | 1 (0 pontos) |
| Tempo maior que 6,52 segundos .....    | 2 (1 pontos) |
| Tempo entre 4,66 e 6,52 segundos ..... | 3 (2 pontos) |
| Tempo entre 3,62 e 4,65 segundos ..... | 4 (3 pontos) |
| Tempo menor que 3,62 segundos .....    | 5 (4 pontos) |

## O PROXIMO TESTE VAI MEDIR A FORÇA DE SUAS PERNAS.

L.4

O(A) Sr(a) se sente seguro(a) para tentar se levantar, rapidamente, da cadeira, sem utilizar seus braços?

|           |   |                |
|-----------|---|----------------|
| SIM ..... | 1 | } VÁ PARA L.5a |
| NÃO ..... | 2 |                |

L.5

Agora, quero que o(a) Sr(a) tente levantar e sentar da cadeira, **UMA ÚNICA VEZ** sem utilizar seus braços como apoio.

|                                               |    |               |
|-----------------------------------------------|----|---------------|
| REALIZOU O TESTE SEM UTILIZAR OS BRAÇOS ..... | 1  | } VÁ PARA L.6 |
| REALIZOU O TESTE UTILIZANDO OS BRAÇOS .....   | 2  |               |
| NÃO TENTOU .....                              | 98 |               |

L. 5a

se o(a) idoso(a) **não tentou ou falhou** assinale o por que e depois vá para a questão L.7b:

|                                                  |    |                |
|--------------------------------------------------|----|----------------|
| TENTOU MAS NÃO CONSEGUIU .....                   | 95 | } VÁ PARA L.7b |
| NÃO PODE REALIZAR O TESTE SEM AUXÍLIO .....      | 90 |                |
| NÃO TENTOU, ENTREVISTADORA SENTIU-SE INSEGURA .  | 91 |                |
| NÃO TENTOU, IDOSO(A) SENTIU-SE INSEGURO(A) ..... | 96 |                |
| IDOSO(A) INCAPAZ DE COMPREENDER AS INSTRUÇÕES .  | 92 |                |
| OUTRO .....                                      | 93 |                |
| <i>ESPECIFIQUE</i>                               |    |                |

## SEÇÃO L. MOBILIDADE E FLEXIBILIDADE

L.6

O Sr. se sente confiante para tentar levantar-se da cadeira, com os braços cruzados cinco vezes seguidas?

SIM ..... 1  
 NÃO ..... 2 →

VÁ PARA L.7a

L.7

Agora, mantendo os braços cruzados sobre o peito, quero que o(a) Sr(a) se levante da cadeira, o mais rapidamente possível, cinco vezes sem fazer nenhuma pausa. Cada vez que o Sr. conseguir ficar em pé, sente-se de novo e, levante-se novamente (60 segundos).

REALIZOU O TESTE SEM UTILIZAR OS BRAÇOS ..... 1  
 ..... EM: |\_\_| |\_\_| segundos →

VÁ PARA L.7b

ANOTE A ALTURA DO ASSENTO DA CADEIRA |\_\_| |\_\_| cm

REALIZOU O TESTE UTILIZANDO OS BRAÇOS ..... 2 (0 PONTOS)

NÃO TENTOU ..... 98 (0 PONTOS)

L. 7a

Se o(a) idoso(a) **não tentou ou falhou** assinale o por que e depois vá para a questão L.7b:

TENTOU MAS NÃO CONSEGUIU ..... 95  
 NÃO PODE REALIZAR O TESTE SEM AUXÍLIO ..... 90  
 NÃO TENTOU, ENTREVISTADORA SENTIU-SE INSEGURA . 91  
 NÃO TENTOU, IDOSO(A) SENTIU-SE INSEGURO(A) ..... 96  
 IDOSO(A) INCAPAZ DE COMPREENDER AS INSTRUÇÕES . 92  
 OUTRO ..... 93

VÁ PARA L.7b

ESPECIFIQUE

L. 7b

**ESCORE**

Não foi capaz de fazer o teste - não realizou os 5 movimentos ou utilizou um tempo > que 60 segundos para completar o teste ..... 1 (0 pontos)

Tempo utilizado no teste = 16,70 segundos ou mais ..... 2 (1 pontos)

Tempo utilizado no teste entre 13,70 e 16,69 segundos ..... 3 (2 pontos)

Tempo utilizado no teste entre 11,20 e 13,69 segundos ..... 4 (3 pontos)

Tempo utilizado no teste = 11,19 segundos ou menos ..... 5 (4 pontos)

**TOTAL DE PONTOS** |\_\_| |\_\_|

L. 7b

**ESCORE DA BATERIA DE TESTE DE DESEMPENHO FÍSICO**

ESCORE TOTAL DOS TESTES DE EQUILÍBRIO ..... |\_\_| |\_\_|

ESCORE TOTAL DOS TESTES DE VELOCIDADE ..... |\_\_| |\_\_|

ESCORE TOTAL DOS TESTES DE FORÇA DE MEMBROS INFERIORES |\_\_| |\_\_|

**ESCORE TOTAL** |\_\_| |\_\_| (some os pontos acima)

**O PROXIMO TESTE VAI MEDIR SUA FLEXIBILIDADE**

L.8

Nas últimas seis semanas, o Sr. fez cirurgia de catarata ou qualquer outro procedimento em seus olhos?

- SIM ..... 1 →
- NÃO ..... 2
- NS ..... 8
- NR ..... 9

ENCERREA ENTREVISTA

L.9

Para este próximo teste, o(a) Sr(a). terá que se agachar e apanhar um lápis do chão.

O(A) Sr(a) só poderá realizar esse teste se NÃO sofreu cirurgia de catarata nas últimas seis semanas.

Começando, fique em pé, agache-se, apanhe este lápis, e fique novamente em pé.

**COLOQUE O LÁPIS NO CHÃO, NA FRENTE DO ENTREVISTADO E AVISE-O QUANDO COMEÇAR. SE O ENTREVISTADO NÃO CONSEGUIR REALIZAR O TESTE EM MENOS DE 30 SEGUNDOS, NÃO O DEIXE CONTINUAR.**

- TENTOU MAS NÃO CONSEGUIU ..... 95
- NÃO PODE MANTER A POSIÇÃO SEM AUXÍLIO ..... 90
- NÃO TENTOU, ENTREVISTADOR SENTIU-SE INSEGURA . 91
- NÃO TENTOU, IDOSO(A) SENTIU-SE INSEGURO(A) ..... 96
- IDOSO(A) INCAPAZ DE COMPREENDER AS INSTRUÇÕES . 92
- OUTRO ..... 93
- ESPECIFIQUE*
- RECUSOU-SE A TENTAR ..... 98

COMPLETOU O TESTE EM:

segundos |\_\_| |\_\_|

HORA DE TÉRMINO: |\_\_| |\_\_| : |\_\_| |\_\_|
